# Supplementary material
Source: publisher figshare collection journal article supplement (https://acs.figshare.com/ndownloader/files/3590970)
Supplement: Supplementary file 1 [file 3590970]

REMARK    GENERATED BY TRJCONV
TITLE     Protein t=   0.00000
REMARK    THIS IS A SIMULATION BOX
CRYST1  137.560  142.890   68.130  90.00  90.00  90.00 P 1           1
MODEL        0
ATOM      1  N   MET A   1      86.140  45.880  23.650  1.00  0.00            
ATOM      2  H1  MET A   1      86.040  44.910  24.010  1.00  0.00            
ATOM      3  H2  MET A   1      85.410  46.500  24.060  1.00  0.00            
ATOM      4  H3  MET A   1      85.980  45.860  22.620  1.00  0.00            
ATOM      5  CA  MET A   1      87.520  46.410  23.900  1.00  0.00            
ATOM      6  HA  MET A   1      87.700  46.480  24.960  1.00  0.00            
ATOM      7  CB  MET A   1      88.530  45.440  23.250  1.00  0.00            
ATOM      8  HB1 MET A   1      88.290  45.320  22.160  1.00  0.00            
ATOM      9  HB2 MET A   1      89.560  45.890  23.290  1.00  0.00            
ATOM     10  CG  MET A   1      88.620  44.050  23.900  1.00  0.00            
ATOM     11  HG1 MET A   1      89.050  44.150  24.910  1.00  0.00            
ATOM     12  HG2 MET A   1      87.610  43.590  24.000  1.00  0.00            
ATOM     13  SD  MET A   1      89.650  42.930  22.910  1.00  0.00            
ATOM     14  CE  MET A   1      89.670  41.590  24.140  1.00  0.00            
ATOM     15  HE1 MET A   1      90.230  40.710  23.740  1.00  0.00            
ATOM     16  HE2 MET A   1      90.170  41.910  25.070  1.00  0.00            
ATOM     17  HE3 MET A   1      88.640  41.240  24.390  1.00  0.00            
ATOM     18  C   MET A   1      87.690  47.790  23.320  1.00  0.00            
ATOM     19  O   MET A   1      87.080  48.090  22.300  1.00  0.00            
ATOM     20  N   GLN A   2      88.480  48.670  23.970  1.00  0.00            
ATOM     21  HN  GLN A   2      88.950  48.460  24.820  1.00  0.00            
ATOM     22  CA  GLN A   2      88.900  49.940  23.410  1.00  0.00            
ATOM     23  HA  GLN A   2      88.940  49.890  22.330  1.00  0.00            
ATOM     24  CB  GLN A   2      88.050  51.150  23.890  1.00  0.00            
ATOM     25  HB1 GLN A   2      88.210  51.290  24.980  1.00  0.00            
ATOM     26  HB2 GLN A   2      88.410  52.060  23.360  1.00  0.00            
ATOM     27  CG  GLN A   2      86.530  50.990  23.650  1.00  0.00            
ATOM     28  HG1 GLN A   2      86.330  50.800  22.570  1.00  0.00            
ATOM     29  HG2 GLN A   2      86.130  50.140  24.230  1.00  0.00            
ATOM     30  CD  GLN A   2      85.730  52.220  24.060  1.00  0.00            
ATOM     31  OE1 GLN A   2      84.540  52.310  23.760  1.00  0.00            
ATOM     32  NE2 GLN A   2      86.330  53.160  24.830  1.00  0.00            
ATOM     33 1HE2 GLN A   2      87.290  53.050  25.050  1.00  0.00            
ATOM     34 2HE2 GLN A   2      85.890  54.050  24.900  1.00  0.00            
ATOM     35  C   GLN A   2      90.290  50.170  23.960  1.00  0.00            
ATOM     36  O   GLN A   2      90.480  50.020  25.160  1.00  0.00            
ATOM     37  N   THR A   3      91.260  50.550  23.110  1.00  0.00            
ATOM     38  HN  THR A   3      91.100  50.670  22.130  1.00  0.00            
ATOM     39  CA  THR A   3      92.640  50.740  23.530  1.00  0.00            
ATOM     40  HA  THR A   3      92.710  50.800  24.600  1.00  0.00            
ATOM     41  CB  THR A   3      93.570  49.630  23.020  1.00  0.00            
ATOM     42  HB  THR A   3      93.560  49.620  21.910  1.00  0.00            
ATOM     43  OG1 THR A   3      93.120  48.370  23.510  1.00  0.00            
ATOM     44  HG1 THR A   3      93.720  47.720  23.120  1.00  0.00            
ATOM     45  CG2 THR A   3      95.000  49.810  23.540  1.00  0.00            
ATOM     46 1HG2 THR A   3      95.640  48.980  23.190  1.00  0.00            
ATOM     47 2HG2 THR A   3      95.450  50.760  23.170  1.00  0.00            
ATOM     48 3HG2 THR A   3      95.010  49.820  24.650  1.00  0.00            
ATOM     49  C   THR A   3      93.120  52.050  22.950  1.00  0.00            
ATOM     50  O   THR A   3      93.080  52.210  21.730  1.00  0.00            
ATOM     51  N   ALA A   4      93.550  53.030  23.770  1.00  0.00            
ATOM     52  HN  ALA A   4      93.530  52.910  24.770  1.00  0.00            
ATOM     53  CA  ALA A   4      93.950  54.330  23.260  1.00  0.00            
ATOM     54  HA  ALA A   4      94.320  54.230  22.250  1.00  0.00            
ATOM     55  CB  ALA A   4      92.720  55.260  23.210  1.00  0.00            
ATOM     56  HB1 ALA A   4      93.000  56.260  22.810  1.00  0.00            
ATOM     57  HB2 ALA A   4      91.940  54.830  22.550  1.00  0.00            
ATOM     58  HB3 ALA A   4      92.290  55.400  24.230  1.00  0.00            
ATOM     59  C   ALA A   4      95.040  55.000  24.100  1.00  0.00            
ATOM     60  O   ALA A   4      94.730  55.560  25.150  1.00  0.00            
ATOM     61  N   PRO A   5      96.320  54.970  23.710  1.00  0.00            
ATOM     62  CD  PRO A   5      96.860  53.930  22.830  1.00  0.00            
ATOM     63  HD1 PRO A   5      96.460  54.040  21.790  1.00  0.00            
ATOM     64  HD2 PRO A   5      96.590  52.930  23.240  1.00  0.00            
ATOM     65  CA  PRO A   5      97.370  55.640  24.470  1.00  0.00            
ATOM     66  HA  PRO A   5      97.100  55.740  25.510  1.00  0.00            
ATOM     67  CB  PRO A   5      98.590  54.730  24.250  1.00  0.00            
ATOM     68  HB1 PRO A   5      99.560  55.270  24.350  1.00  0.00            
ATOM     69  HB2 PRO A   5      98.570  53.910  24.990  1.00  0.00            
ATOM     70  CG  PRO A   5      98.370  54.130  22.870  1.00  0.00            
ATOM     71  HG1 PRO A   5      98.670  54.870  22.090  1.00  0.00            
ATOM     72  HG2 PRO A   5      98.940  53.180  22.720  1.00  0.00            
ATOM     73  C   PRO A   5      97.680  57.040  23.980  1.00  0.00            
ATOM     74  O   PRO A   5      97.660  57.310  22.780  1.00  0.00            
ATOM     75  N   VAL A   6      98.020  57.960  24.910  1.00  0.00            
ATOM     76  HN  VAL A   6      97.940  57.720  25.880  1.00  0.00            
ATOM     77  CA  VAL A   6      98.660  59.230  24.610  1.00  0.00            
ATOM     78  HA  VAL A   6      98.410  59.510  23.600  1.00  0.00            
ATOM     79  CB  VAL A   6      98.160  60.340  25.540  1.00  0.00            
ATOM     80  HB  VAL A   6      98.470  60.130  26.590  1.00  0.00            
ATOM     81  CG1 VAL A   6      98.680  61.730  25.140  1.00  0.00            
ATOM     82 1HG1 VAL A   6      98.210  62.510  25.780  1.00  0.00            
ATOM     83 2HG1 VAL A   6      99.780  61.810  25.260  1.00  0.00            
ATOM     84 3HG1 VAL A   6      98.420  61.950  24.080  1.00  0.00            
ATOM     85  CG2 VAL A   6      96.610  60.360  25.500  1.00  0.00            
ATOM     86 1HG2 VAL A   6      96.210  61.190  26.120  1.00  0.00            
ATOM     87 2HG2 VAL A   6      96.260  60.500  24.450  1.00  0.00            
ATOM     88 3HG2 VAL A   6      96.180  59.410  25.890  1.00  0.00            
ATOM     89  C   VAL A   6     100.180  58.990  24.640  1.00  0.00            
ATOM     90  O   VAL A   6     100.620  57.950  25.140  1.00  0.00            
ATOM     91  N   PRO A   7     100.970  59.850  23.990  1.00  0.00            
ATOM     92  CD  PRO A   7     101.200  59.310  22.650  1.00  0.00            
ATOM     93  HD1 PRO A   7     101.290  60.190  21.970  1.00  0.00            
ATOM     94  HD2 PRO A   7     100.380  58.660  22.270  1.00  0.00            
ATOM     95  CA  PRO A   7     102.300  60.200  24.510  1.00  0.00            
ATOM     96  HA  PRO A   7     102.330  60.280  25.570  1.00  0.00            
ATOM     97  CB  PRO A   7     103.250  59.110  23.990  1.00  0.00            
ATOM     98  HB1 PRO A   7     104.260  59.490  23.770  1.00  0.00            
ATOM     99  HB2 PRO A   7     103.340  58.300  24.740  1.00  0.00            
ATOM    100  CG  PRO A   7     102.530  58.550  22.750  1.00  0.00            
ATOM    101  HG1 PRO A   7     103.130  58.680  21.830  1.00  0.00            
ATOM    102  HG2 PRO A   7     102.320  57.470  22.920  1.00  0.00            
ATOM    103  C   PRO A   7     102.780  61.580  24.070  1.00  0.00            
ATOM    104  O   PRO A   7     102.760  61.910  22.890  1.00  0.00            
ATOM    105  N   MET A   8     103.280  62.400  25.020  1.00  0.00            
ATOM    106  HN  MET A   8     103.230  62.160  26.000  1.00  0.00            
ATOM    107  CA  MET A   8     104.080  63.570  24.680  1.00  0.00            
ATOM    108  HA  MET A   8     103.930  63.820  23.640  1.00  0.00            
ATOM    109  CB  MET A   8     103.650  64.830  25.470  1.00  0.00            
ATOM    110  HB1 MET A   8     103.600  64.600  26.560  1.00  0.00            
ATOM    111  HB2 MET A   8     104.400  65.640  25.320  1.00  0.00            
ATOM    112  CG  MET A   8     102.280  65.340  24.980  1.00  0.00            
ATOM    113  HG1 MET A   8     102.350  65.470  23.880  1.00  0.00            
ATOM    114  HG2 MET A   8     101.530  64.540  25.150  1.00  0.00            
ATOM    115  SD  MET A   8     101.710  66.890  25.730  1.00  0.00            
ATOM    116  CE  MET A   8     100.180  66.890  24.740  1.00  0.00            
ATOM    117  HE1 MET A   8      99.540  67.770  24.990  1.00  0.00            
ATOM    118  HE2 MET A   8     100.410  66.930  23.650  1.00  0.00            
ATOM    119  HE3 MET A   8      99.580  65.980  24.930  1.00  0.00            
ATOM    120  C   MET A   8     105.560  63.240  24.790  1.00  0.00            
ATOM    121  O   MET A   8     105.950  62.190  25.290  1.00  0.00            
ATOM    122  N   PRO A   9     106.350  64.080  24.130  1.00  0.00            
ATOM    123  CD  PRO A   9     106.620  63.490  22.820  1.00  0.00            
ATOM    124  HD1 PRO A   9     106.650  64.330  22.090  1.00  0.00            
ATOM    125  HD2 PRO A   9     105.830  62.770  22.470  1.00  0.00            
ATOM    126  CA  PRO A   9     107.670  64.480  24.650  1.00  0.00            
ATOM    127  HA  PRO A   9     107.680  64.630  25.710  1.00  0.00            
ATOM    128  CB  PRO A   9     108.640  63.390  24.190  1.00  0.00            
ATOM    129  HB1 PRO A   9     109.660  63.770  24.010  1.00  0.00            
ATOM    130  HB2 PRO A   9     108.700  62.590  24.970  1.00  0.00            
ATOM    131  CG  PRO A   9     107.980  62.800  22.940  1.00  0.00            
ATOM    132  HG1 PRO A   9     108.600  62.990  22.030  1.00  0.00            
ATOM    133  HG2 PRO A   9     107.840  61.700  23.090  1.00  0.00            
ATOM    134  C   PRO A   9     108.110  65.850  24.130  1.00  0.00            
ATOM    135  O   PRO A   9     108.050  66.100  22.930  1.00  0.00            
ATOM    136  N   ASP A  10     108.590  66.740  25.020  1.00  0.00            
ATOM    137  HN  ASP A  10     108.610  66.560  26.010  1.00  0.00            
ATOM    138  CA  ASP A  10     109.090  68.040  24.610  1.00  0.00            
ATOM    139  HA  ASP A  10     109.160  68.090  23.530  1.00  0.00            
ATOM    140  CB  ASP A  10     108.150  69.130  25.170  1.00  0.00            
ATOM    141  HB1 ASP A  10     107.220  68.640  25.510  1.00  0.00            
ATOM    142  HB2 ASP A  10     108.580  69.680  26.030  1.00  0.00            
ATOM    143  CG  ASP A  10     107.780  70.130  24.090  1.00  0.00            
ATOM    144  OD1 ASP A  10     106.600  70.070  23.650  1.00  0.00            
ATOM    145  OD2 ASP A  10     108.610  71.000  23.760  1.00  0.00            
ATOM    146  C   ASP A  10     110.490  68.210  25.170  1.00  0.00            
ATOM    147  O   ASP A  10     110.710  68.180  26.380  1.00  0.00            
ATOM    148  N   LEU A  11     111.500  68.360  24.290  1.00  0.00            
ATOM    149  HN  LEU A  11     111.320  68.390  23.310  1.00  0.00            
ATOM    150  CA  LEU A  11     112.870  68.570  24.720  1.00  0.00            
ATOM    151  HA  LEU A  11     112.920  68.620  25.800  1.00  0.00            
ATOM    152  CB  LEU A  11     113.880  67.470  24.250  1.00  0.00            
ATOM    153  HB1 LEU A  11     114.040  67.570  23.160  1.00  0.00            
ATOM    154  HB2 LEU A  11     114.850  67.670  24.750  1.00  0.00            
ATOM    155  CG  LEU A  11     113.520  65.990  24.520  1.00  0.00            
ATOM    156  HG  LEU A  11     112.680  65.700  23.830  1.00  0.00            
ATOM    157  CD1 LEU A  11     114.730  65.090  24.230  1.00  0.00            
ATOM    158 1HD1 LEU A  11     114.470  64.020  24.390  1.00  0.00            
ATOM    159 2HD1 LEU A  11     115.090  65.220  23.190  1.00  0.00            
ATOM    160 3HD1 LEU A  11     115.560  65.340  24.920  1.00  0.00            
ATOM    161  CD2 LEU A  11     113.070  65.710  25.950  1.00  0.00            
ATOM    162 1HD2 LEU A  11     112.860  64.630  26.090  1.00  0.00            
ATOM    163 2HD2 LEU A  11     113.900  65.990  26.630  1.00  0.00            
ATOM    164 3HD2 LEU A  11     112.170  66.280  26.230  1.00  0.00            
ATOM    165  C   LEU A  11     113.360  69.900  24.170  1.00  0.00            
ATOM    166  O   LEU A  11     113.490  70.060  22.960  1.00  0.00            
ATOM    167  N   LYS A  12     113.680  70.850  25.080  1.00  0.00            
ATOM    168  HN  LYS A  12     113.400  70.670  26.030  1.00  0.00            
ATOM    169  CA  LYS A  12     114.520  72.020  24.870  1.00  0.00            
ATOM    170  HA  LYS A  12     115.250  71.870  25.640  1.00  0.00            
ATOM    171  CB  LYS A  12     115.430  72.030  23.600  1.00  0.00            
ATOM    172  HB1 LYS A  12     115.870  71.010  23.500  1.00  0.00            
ATOM    173  HB2 LYS A  12     114.780  72.190  22.710  1.00  0.00            
ATOM    174  CG  LYS A  12     116.590  73.030  23.610  1.00  0.00            
ATOM    175  HG1 LYS A  12     116.210  73.970  24.060  1.00  0.00            
ATOM    176  HG2 LYS A  12     117.400  72.630  24.270  1.00  0.00            
ATOM    177  CD  LYS A  12     117.130  73.350  22.210  1.00  0.00            
ATOM    178  HD1 LYS A  12     117.530  72.410  21.760  1.00  0.00            
ATOM    179  HD2 LYS A  12     116.260  73.670  21.600  1.00  0.00            
ATOM    180  CE  LYS A  12     118.200  74.450  22.180  1.00  0.00            
ATOM    181  HE1 LYS A  12     117.840  75.350  22.720  1.00  0.00            
ATOM    182  HE2 LYS A  12     119.140  74.090  22.660  1.00  0.00            
ATOM    183  NZ  LYS A  12     118.520  74.850  20.790  1.00  0.00            
ATOM    184  HZ1 LYS A  12     119.270  75.570  20.770  1.00  0.00            
ATOM    185  HZ2 LYS A  12     118.830  74.020  20.240  1.00  0.00            
ATOM    186  HZ3 LYS A  12     117.670  75.240  20.340  1.00  0.00            
ATOM    187  C   LYS A  12     113.900  73.380  25.260  1.00  0.00            
ATOM    188  O   LYS A  12     113.860  73.730  26.430  1.00  0.00            
ATOM    189  N   ASN A  13     113.510  74.270  24.330  1.00  0.00            
ATOM    190  HN  ASN A  13     113.390  74.000  23.380  1.00  0.00            
ATOM    191  CA  ASN A  13     113.140  75.640  24.710  1.00  0.00            
ATOM    192  HA  ASN A  13     113.130  75.760  25.790  1.00  0.00            
ATOM    193  CB  ASN A  13     114.110  76.690  24.100  1.00  0.00            
ATOM    194  HB1 ASN A  13     114.350  76.410  23.050  1.00  0.00            
ATOM    195  HB2 ASN A  13     113.630  77.690  24.070  1.00  0.00            
ATOM    196  CG  ASN A  13     115.410  76.810  24.890  1.00  0.00            
ATOM    197  OD1 ASN A  13     116.450  76.200  24.640  1.00  0.00            
ATOM    198  ND2 ASN A  13     115.380  77.690  25.930  1.00  0.00            
ATOM    199 1HD2 ASN A  13     114.530  78.180  26.120  1.00  0.00            
ATOM    200 2HD2 ASN A  13     116.220  77.870  26.430  1.00  0.00            
ATOM    201  C   ASN A  13     111.720  75.970  24.280  1.00  0.00            
ATOM    202  O   ASN A  13     111.440  76.130  23.100  1.00  0.00            
ATOM    203  N   VAL A  14     110.820  76.130  25.270  1.00  0.00            
ATOM    204  HN  VAL A  14     111.080  76.010  26.230  1.00  0.00            
ATOM    205  CA  VAL A  14     109.400  76.320  25.090  1.00  0.00            
ATOM    206  HA  VAL A  14     109.120  76.140  24.060  1.00  0.00            
ATOM    207  CB  VAL A  14     108.640  75.360  26.020  1.00  0.00            
ATOM    208  HB  VAL A  14     108.930  75.570  27.070  1.00  0.00            
ATOM    209  CG1 VAL A  14     107.120  75.530  25.890  1.00  0.00            
ATOM    210 1HG1 VAL A  14     106.610  74.790  26.540  1.00  0.00            
ATOM    211 2HG1 VAL A  14     106.780  76.540  26.180  1.00  0.00            
ATOM    212 3HG1 VAL A  14     106.820  75.330  24.840  1.00  0.00            
ATOM    213  CG2 VAL A  14     109.060  73.900  25.740  1.00  0.00            
ATOM    214 1HG2 VAL A  14     108.510  73.210  26.410  1.00  0.00            
ATOM    215 2HG2 VAL A  14     108.840  73.610  24.690  1.00  0.00            
ATOM    216 3HG2 VAL A  14     110.140  73.730  25.930  1.00  0.00            
ATOM    217  C   VAL A  14     109.040  77.740  25.490  1.00  0.00            
ATOM    218  O   VAL A  14     109.140  78.120  26.650  1.00  0.00            
ATOM    219  N   LYS A  15     108.630  78.610  24.530  1.00  0.00            
ATOM    220  HN  LYS A  15     108.580  78.330  23.580  1.00  0.00            
ATOM    221  CA  LYS A  15     108.210  79.960  24.900  1.00  0.00            
ATOM    222  HA  LYS A  15     108.660  80.210  25.840  1.00  0.00            
ATOM    223  CB  LYS A  15     108.700  81.060  23.930  1.00  0.00            
ATOM    224  HB1 LYS A  15     109.800  80.960  23.840  1.00  0.00            
ATOM    225  HB2 LYS A  15     108.260  80.910  22.920  1.00  0.00            
ATOM    226  CG  LYS A  15     108.350  82.470  24.460  1.00  0.00            
ATOM    227  HG1 LYS A  15     107.250  82.620  24.370  1.00  0.00            
ATOM    228  HG2 LYS A  15     108.590  82.500  25.550  1.00  0.00            
ATOM    229  CD  LYS A  15     109.080  83.610  23.730  1.00  0.00            
ATOM    230  HD1 LYS A  15     110.170  83.490  23.920  1.00  0.00            
ATOM    231  HD2 LYS A  15     108.900  83.480  22.640  1.00  0.00            
ATOM    232  CE  LYS A  15     108.600  84.990  24.180  1.00  0.00            
ATOM    233  HE1 LYS A  15     107.520  85.120  23.940  1.00  0.00            
ATOM    234  HE2 LYS A  15     108.740  85.110  25.270  1.00  0.00            
ATOM    235  NZ  LYS A  15     109.360  86.060  23.490  1.00  0.00            
ATOM    236  HZ1 LYS A  15     109.030  87.000  23.770  1.00  0.00            
ATOM    237  HZ2 LYS A  15     110.380  85.970  23.680  1.00  0.00            
ATOM    238  HZ3 LYS A  15     109.230  85.960  22.460  1.00  0.00            
ATOM    239  C   LYS A  15     106.720  80.090  25.140  1.00  0.00            
ATOM    240  O   LYS A  15     106.330  80.500  26.230  1.00  0.00            
ATOM    241  N   SER A  16     105.850  79.750  24.170  1.00  0.00            
ATOM    242  HN  SER A  16     106.120  79.510  23.240  1.00  0.00            
ATOM    243  CA  SER A  16     104.420  79.610  24.420  1.00  0.00            
ATOM    244  HA  SER A  16     104.270  79.470  25.480  1.00  0.00            
ATOM    245  CB  SER A  16     103.530  80.840  24.050  1.00  0.00            
ATOM    246  HB1 SER A  16     102.460  80.580  24.230  1.00  0.00            
ATOM    247  HB2 SER A  16     103.800  81.670  24.730  1.00  0.00            
ATOM    248  OG  SER A  16     103.720  81.290  22.710  1.00  0.00            
ATOM    249  HG1 SER A  16     102.950  81.820  22.470  1.00  0.00            
ATOM    250  C   SER A  16     103.910  78.350  23.760  1.00  0.00            
ATOM    251  O   SER A  16     104.090  78.120  22.570  1.00  0.00            
ATOM    252  N   LYS A  17     103.310  77.450  24.560  1.00  0.00            
ATOM    253  HN  LYS A  17     103.250  77.620  25.540  1.00  0.00            
ATOM    254  CA  LYS A  17     102.860  76.150  24.100  1.00  0.00            
ATOM    255  HA  LYS A  17     102.860  76.100  23.020  1.00  0.00            
ATOM    256  CB  LYS A  17     103.800  75.070  24.690  1.00  0.00            
ATOM    257  HB1 LYS A  17     104.810  75.250  24.250  1.00  0.00            
ATOM    258  HB2 LYS A  17     103.870  75.230  25.790  1.00  0.00            
ATOM    259  CG  LYS A  17     103.430  73.600  24.430  1.00  0.00            
ATOM    260  HG1 LYS A  17     102.420  73.380  24.840  1.00  0.00            
ATOM    261  HG2 LYS A  17     103.410  73.400  23.330  1.00  0.00            
ATOM    262  CD  LYS A  17     104.470  72.670  25.100  1.00  0.00            
ATOM    263  HD1 LYS A  17     105.430  72.780  24.550  1.00  0.00            
ATOM    264  HD2 LYS A  17     104.630  73.040  26.140  1.00  0.00            
ATOM    265  CE  LYS A  17     104.070  71.200  25.150  1.00  0.00            
ATOM    266  HE1 LYS A  17     103.140  71.050  25.740  1.00  0.00            
ATOM    267  HE2 LYS A  17     103.910  70.820  24.120  1.00  0.00            
ATOM    268  NZ  LYS A  17     105.150  70.400  25.760  1.00  0.00            
ATOM    269  HZ1 LYS A  17     104.910  69.400  25.850  1.00  0.00            
ATOM    270  HZ2 LYS A  17     105.920  70.400  25.010  1.00  0.00            
ATOM    271  HZ3 LYS A  17     105.580  70.740  26.650  1.00  0.00            
ATOM    272  C   LYS A  17     101.440  75.910  24.580  1.00  0.00            
ATOM    273  O   LYS A  17     101.160  75.970  25.770  1.00  0.00            
ATOM    274  N   ILE A  18     100.510  75.640  23.650  1.00  0.00            
ATOM    275  HN  ILE A  18     100.740  75.600  22.680  1.00  0.00            
ATOM    276  CA  ILE A  18      99.120  75.380  23.960  1.00  0.00            
ATOM    277  HA  ILE A  18      98.980  75.320  25.030  1.00  0.00            
ATOM    278  CB  ILE A  18      98.170  76.440  23.400  1.00  0.00            
ATOM    279  HB  ILE A  18      98.230  76.440  22.290  1.00  0.00            
ATOM    280  CG2 ILE A  18      96.720  76.120  23.820  1.00  0.00            
ATOM    281 1HG2 ILE A  18      96.010  76.870  23.410  1.00  0.00            
ATOM    282 2HG2 ILE A  18      96.390  75.130  23.430  1.00  0.00            
ATOM    283 3HG2 ILE A  18      96.630  76.110  24.930  1.00  0.00            
ATOM    284  CG1 ILE A  18      98.590  77.860  23.880  1.00  0.00            
ATOM    285 1HG1 ILE A  18      98.520  77.890  24.990  1.00  0.00            
ATOM    286 2HG1 ILE A  18      99.660  78.030  23.620  1.00  0.00            
ATOM    287  CD  ILE A  18      97.770  79.000  23.270  1.00  0.00            
ATOM    288  HD1 ILE A  18      98.150  79.980  23.620  1.00  0.00            
ATOM    289  HD2 ILE A  18      97.840  78.970  22.160  1.00  0.00            
ATOM    290  HD3 ILE A  18      96.700  78.920  23.550  1.00  0.00            
ATOM    291  C   ILE A  18      98.760  74.030  23.370  1.00  0.00            
ATOM    292  O   ILE A  18      98.930  73.800  22.170  1.00  0.00            
ATOM    293  N   GLY A  19      98.270  73.080  24.190  1.00  0.00            
ATOM    294  HN  GLY A  19      98.220  73.260  25.180  1.00  0.00            
ATOM    295  CA  GLY A  19      97.740  71.810  23.710  1.00  0.00            
ATOM    296  HA1 GLY A  19      97.650  71.820  22.630  1.00  0.00            
ATOM    297  HA2 GLY A  19      98.380  71.030  24.090  1.00  0.00            
ATOM    298  C   GLY A  19      96.380  71.570  24.280  1.00  0.00            
ATOM    299  O   GLY A  19      96.200  71.610  25.500  1.00  0.00            
ATOM    300  N   SER A  20      95.380  71.270  23.430  1.00  0.00            
ATOM    301  HN  SER A  20      95.500  71.280  22.440  1.00  0.00            
ATOM    302  CA  SER A  20      94.030  70.940  23.870  1.00  0.00            
ATOM    303  HA  SER A  20      94.030  70.780  24.930  1.00  0.00            
ATOM    304  CB  SER A  20      93.000  72.070  23.600  1.00  0.00            
ATOM    305  HB1 SER A  20      91.970  71.710  23.830  1.00  0.00            
ATOM    306  HB2 SER A  20      93.240  72.910  24.290  1.00  0.00            
ATOM    307  OG  SER A  20      93.070  72.570  22.260  1.00  0.00            
ATOM    308  HG1 SER A  20      92.300  73.140  22.120  1.00  0.00            
ATOM    309  C   SER A  20      93.570  69.640  23.250  1.00  0.00            
ATOM    310  O   SER A  20      93.630  69.430  22.040  1.00  0.00            
ATOM    311  N   THR A  21      93.110  68.700  24.100  1.00  0.00            
ATOM    312  HN  THR A  21      93.120  68.890  25.090  1.00  0.00            
ATOM    313  CA  THR A  21      92.680  67.370  23.690  1.00  0.00            
ATOM    314  HA  THR A  21      92.670  67.290  22.610  1.00  0.00            
ATOM    315  CB  THR A  21      93.580  66.270  24.260  1.00  0.00            
ATOM    316  HB  THR A  21      93.610  66.360  25.370  1.00  0.00            
ATOM    317  OG1 THR A  21      94.890  66.380  23.750  1.00  0.00            
ATOM    318  HG1 THR A  21      95.430  65.780  24.270  1.00  0.00            
ATOM    319  CG2 THR A  21      93.100  64.860  23.870  1.00  0.00            
ATOM    320 1HG2 THR A  21      93.800  64.090  24.270  1.00  0.00            
ATOM    321 2HG2 THR A  21      92.090  64.630  24.270  1.00  0.00            
ATOM    322 3HG2 THR A  21      93.080  64.760  22.760  1.00  0.00            
ATOM    323  C   THR A  21      91.290  67.130  24.200  1.00  0.00            
ATOM    324  O   THR A  21      91.070  67.060  25.410  1.00  0.00            
ATOM    325  N   GLU A  22      90.290  66.960  23.310  1.00  0.00            
ATOM    326  HN  GLU A  22      90.450  67.050  22.330  1.00  0.00            
ATOM    327  CA  GLU A  22      88.910  66.740  23.690  1.00  0.00            
ATOM    328  HA  GLU A  22      88.860  66.580  24.760  1.00  0.00            
ATOM    329  CB  GLU A  22      88.030  68.010  23.460  1.00  0.00            
ATOM    330  HB1 GLU A  22      86.970  67.800  23.700  1.00  0.00            
ATOM    331  HB2 GLU A  22      88.380  68.750  24.220  1.00  0.00            
ATOM    332  CG  GLU A  22      88.130  68.760  22.100  1.00  0.00            
ATOM    333  HG1 GLU A  22      89.170  68.770  21.720  1.00  0.00            
ATOM    334  HG2 GLU A  22      87.480  68.260  21.350  1.00  0.00            
ATOM    335  CD  GLU A  22      87.690  70.230  22.190  1.00  0.00            
ATOM    336  OE1 GLU A  22      88.340  71.030  22.930  1.00  0.00            
ATOM    337  OE2 GLU A  22      86.690  70.600  21.520  1.00  0.00            
ATOM    338  C   GLU A  22      88.390  65.420  23.090  1.00  0.00            
ATOM    339  O   GLU A  22      88.420  65.190  21.890  1.00  0.00            
ATOM    340  N   ASN A  23      87.990  64.460  23.960  1.00  0.00            
ATOM    341  HN  ASN A  23      88.000  64.660  24.950  1.00  0.00            
ATOM    342  CA  ASN A  23      87.620  63.100  23.560  1.00  0.00            
ATOM    343  HA  ASN A  23      87.580  63.030  22.480  1.00  0.00            
ATOM    344  CB  ASN A  23      88.570  62.020  24.140  1.00  0.00            
ATOM    345  HB1 ASN A  23      88.520  62.030  25.250  1.00  0.00            
ATOM    346  HB2 ASN A  23      88.270  61.010  23.790  1.00  0.00            
ATOM    347  CG  ASN A  23      90.050  62.190  23.780  1.00  0.00            
ATOM    348  OD1 ASN A  23      90.920  61.910  24.600  1.00  0.00            
ATOM    349  ND2 ASN A  23      90.360  62.620  22.540  1.00  0.00            
ATOM    350 1HD2 ASN A  23      89.660  63.020  21.950  1.00  0.00            
ATOM    351 2HD2 ASN A  23      91.330  62.670  22.320  1.00  0.00            
ATOM    352  C   ASN A  23      86.240  62.740  24.080  1.00  0.00            
ATOM    353  O   ASN A  23      86.050  62.610  25.290  1.00  0.00            
ATOM    354  N   LEU A  24      85.240  62.520  23.200  1.00  0.00            
ATOM    355  HN  LEU A  24      85.380  62.610  22.220  1.00  0.00            
ATOM    356  CA  LEU A  24      83.880  62.250  23.620  1.00  0.00            
ATOM    357  HA  LEU A  24      83.810  62.240  24.700  1.00  0.00            
ATOM    358  CB  LEU A  24      82.860  63.290  23.090  1.00  0.00            
ATOM    359  HB1 LEU A  24      82.720  63.160  21.990  1.00  0.00            
ATOM    360  HB2 LEU A  24      81.880  63.100  23.570  1.00  0.00            
ATOM    361  CG  LEU A  24      83.220  64.780  23.310  1.00  0.00            
ATOM    362  HG  LEU A  24      84.050  65.060  22.630  1.00  0.00            
ATOM    363  CD1 LEU A  24      82.010  65.680  23.000  1.00  0.00            
ATOM    364 1HD1 LEU A  24      82.280  66.750  23.160  1.00  0.00            
ATOM    365 2HD1 LEU A  24      81.670  65.540  21.960  1.00  0.00            
ATOM    366 3HD1 LEU A  24      81.170  65.430  23.690  1.00  0.00            
ATOM    367  CD2 LEU A  24      83.650  65.090  24.740  1.00  0.00            
ATOM    368 1HD2 LEU A  24      83.820  66.180  24.880  1.00  0.00            
ATOM    369 2HD2 LEU A  24      82.850  64.770  25.430  1.00  0.00            
ATOM    370 3HD2 LEU A  24      84.590  64.570  25.030  1.00  0.00            
ATOM    371  C   LEU A  24      83.420  60.880  23.130  1.00  0.00            
ATOM    372  O   LEU A  24      83.530  60.550  21.950  1.00  0.00            
ATOM    373  N   LYS A  25      82.890  60.030  24.040  1.00  0.00            
ATOM    374  HN  LYS A  25      82.910  60.270  25.010  1.00  0.00            
ATOM    375  CA  LYS A  25      82.320  58.750  23.680  1.00  0.00            
ATOM    376  HA  LYS A  25      82.280  58.630  22.600  1.00  0.00            
ATOM    377  CB  LYS A  25      83.120  57.570  24.290  1.00  0.00            
ATOM    378  HB1 LYS A  25      84.140  57.570  23.830  1.00  0.00            
ATOM    379  HB2 LYS A  25      83.250  57.770  25.380  1.00  0.00            
ATOM    380  CG  LYS A  25      82.470  56.190  24.100  1.00  0.00            
ATOM    381  HG1 LYS A  25      81.410  56.220  24.450  1.00  0.00            
ATOM    382  HG2 LYS A  25      82.450  55.920  23.020  1.00  0.00            
ATOM    383  CD  LYS A  25      83.150  55.080  24.910  1.00  0.00            
ATOM    384  HD1 LYS A  25      84.040  54.760  24.330  1.00  0.00            
ATOM    385  HD2 LYS A  25      83.500  55.520  25.870  1.00  0.00            
ATOM    386  CE  LYS A  25      82.190  53.920  25.180  1.00  0.00            
ATOM    387  HE1 LYS A  25      81.370  54.240  25.850  1.00  0.00            
ATOM    388  HE2 LYS A  25      81.760  53.560  24.220  1.00  0.00            
ATOM    389  NZ  LYS A  25      82.910  52.800  25.800  1.00  0.00            
ATOM    390  HZ1 LYS A  25      82.280  52.000  25.950  1.00  0.00            
ATOM    391  HZ2 LYS A  25      83.620  52.510  25.070  1.00  0.00            
ATOM    392  HZ3 LYS A  25      83.410  53.070  26.660  1.00  0.00            
ATOM    393  C   LYS A  25      80.900  58.640  24.190  1.00  0.00            
ATOM    394  O   LYS A  25      80.640  58.700  25.390  1.00  0.00            
ATOM    395  N   HSD A  26      79.930  58.400  23.290  1.00  0.00            
ATOM    396  HN  HSD A  26      80.130  58.380  22.310  1.00  0.00            
ATOM    397  CA  HSD A  26      78.570  58.060  23.670  1.00  0.00            
ATOM    398  HA  HSD A  26      78.440  58.180  24.740  1.00  0.00            
ATOM    399  CB  HSD A  26      77.530  58.950  22.950  1.00  0.00            
ATOM    400  HB1 HSD A  26      77.680  58.880  21.850  1.00  0.00            
ATOM    401  HB2 HSD A  26      76.500  58.580  23.180  1.00  0.00            
ATOM    402  ND1 HSD A  26      76.740  61.340  22.840  1.00  0.00            
ATOM    403  HD1 HSD A  26      76.060  61.200  22.120  1.00  0.00            
ATOM    404  CG  HSD A  26      77.580  60.390  23.360  1.00  0.00            
ATOM    405  CE1 HSD A  26      77.030  62.520  23.440  1.00  0.00            
ATOM    406  HE1 HSD A  26      76.530  63.460  23.210  1.00  0.00            
ATOM    407  NE2 HSD A  26      78.000  62.390  24.320  1.00  0.00            
ATOM    408  CD2 HSD A  26      78.360  61.060  24.270  1.00  0.00            
ATOM    409  HD2 HSD A  26      79.160  60.710  24.900  1.00  0.00            
ATOM    410  C   HSD A  26      78.290  56.610  23.350  1.00  0.00            
ATOM    411  O   HSD A  26      78.740  56.060  22.360  1.00  0.00            
ATOM    412  N   GLN A  27      77.510  55.950  24.230  1.00  0.00            
ATOM    413  HN  GLN A  27      77.170  56.380  25.050  1.00  0.00            
ATOM    414  CA  GLN A  27      76.960  54.630  23.970  1.00  0.00            
ATOM    415  HA  GLN A  27      77.050  54.400  22.920  1.00  0.00            
ATOM    416  CB  GLN A  27      77.750  53.540  24.740  1.00  0.00            
ATOM    417  HB1 GLN A  27      78.820  53.700  24.480  1.00  0.00            
ATOM    418  HB2 GLN A  27      77.650  53.690  25.830  1.00  0.00            
ATOM    419  CG  GLN A  27      77.400  52.080  24.340  1.00  0.00            
ATOM    420  HG1 GLN A  27      76.410  51.780  24.740  1.00  0.00            
ATOM    421  HG2 GLN A  27      77.360  51.990  23.240  1.00  0.00            
ATOM    422  CD  GLN A  27      78.440  51.070  24.830  1.00  0.00            
ATOM    423  OE1 GLN A  27      78.760  50.060  24.200  1.00  0.00            
ATOM    424  NE2 GLN A  27      79.010  51.330  26.030  1.00  0.00            
ATOM    425 1HE2 GLN A  27      78.690  52.130  26.520  1.00  0.00            
ATOM    426 2HE2 GLN A  27      79.410  50.540  26.490  1.00  0.00            
ATOM    427  C   GLN A  27      75.480  54.740  24.320  1.00  0.00            
ATOM    428  O   GLN A  27      75.100  55.730  24.960  1.00  0.00            
ATOM    429  N   PRO A  28      74.660  53.820  23.780  1.00  0.00            
ATOM    430  CD  PRO A  28      74.470  54.260  22.400  1.00  0.00            
ATOM    431  HD1 PRO A  28      74.430  53.340  21.770  1.00  0.00            
ATOM    432  HD2 PRO A  28      75.260  54.930  21.970  1.00  0.00            
ATOM    433  CA  PRO A  28      73.300  53.510  24.290  1.00  0.00            
ATOM    434  HA  PRO A  28      73.270  53.370  25.340  1.00  0.00            
ATOM    435  CB  PRO A  28      72.480  54.700  23.770  1.00  0.00            
ATOM    436  HB1 PRO A  28      71.390  54.470  23.670  1.00  0.00            
ATOM    437  HB2 PRO A  28      72.590  55.570  24.460  1.00  0.00            
ATOM    438  CG  PRO A  28      73.130  55.020  22.410  1.00  0.00            
ATOM    439  HG1 PRO A  28      72.500  54.640  21.570  1.00  0.00            
ATOM    440  HG2 PRO A  28      73.280  56.120  22.310  1.00  0.00            
ATOM    441  C   PRO A  28      72.670  52.220  23.730  1.00  0.00            
ATOM    442  O   PRO A  28      72.560  52.020  22.530  1.00  0.00            
ATOM    443  N   GLY A  29      72.190  51.310  24.610  1.00  0.00            
ATOM    444  HN  GLY A  29      72.250  51.470  25.610  1.00  0.00            
ATOM    445  CA  GLY A  29      71.550  50.070  24.180  1.00  0.00            
ATOM    446  HA1 GLY A  29      71.470  50.040  23.100  1.00  0.00            
ATOM    447  HA2 GLY A  29      72.140  49.250  24.560  1.00  0.00            
ATOM    448  C   GLY A  29      70.160  49.900  24.730  1.00  0.00            
ATOM    449  O   GLY A  29      69.940  49.960  25.940  1.00  0.00            
ATOM    450  N   GLY A  30      69.150  49.670  23.860  1.00  0.00            
ATOM    451  HN  GLY A  30      69.340  49.620  22.880  1.00  0.00            
ATOM    452  CA  GLY A  30      67.760  49.520  24.290  1.00  0.00            
ATOM    453  HA1 GLY A  30      67.690  49.520  25.370  1.00  0.00            
ATOM    454  HA2 GLY A  30      67.210  50.340  23.840  1.00  0.00            
ATOM    455  C   GLY A  30      67.110  48.250  23.800  1.00  0.00            
ATOM    456  O   GLY A  30      66.740  48.150  22.630  1.00  0.00            
ATOM    457  N   GLY A  31      66.890  47.270  24.700  1.00  0.00            
ATOM    458  HN  GLY A  31      67.100  47.430  25.670  1.00  0.00            
ATOM    459  CA  GLY A  31      66.280  45.980  24.370  1.00  0.00            
ATOM    460  HA1 GLY A  31      66.250  45.850  23.290  1.00  0.00            
ATOM    461  HA2 GLY A  31      66.880  45.220  24.860  1.00  0.00            
ATOM    462  C   GLY A  31      64.880  45.860  24.900  1.00  0.00            
ATOM    463  O   GLY A  31      64.570  46.310  26.010  1.00  0.00            
ATOM    464  N   LYS A  32      63.960  45.260  24.120  1.00  0.00            
ATOM    465  HN  LYS A  32      64.200  44.880  23.230  1.00  0.00            
ATOM    466  CA  LYS A  32      62.560  45.130  24.500  1.00  0.00            
ATOM    467  HA  LYS A  32      62.470  45.160  25.580  1.00  0.00            
ATOM    468  CB  LYS A  32      61.680  46.230  23.830  1.00  0.00            
ATOM    469  HB1 LYS A  32      61.450  45.920  22.780  1.00  0.00            
ATOM    470  HB2 LYS A  32      60.710  46.290  24.380  1.00  0.00            
ATOM    471  CG  LYS A  32      62.340  47.620  23.740  1.00  0.00            
ATOM    472  HG1 LYS A  32      62.630  47.960  24.750  1.00  0.00            
ATOM    473  HG2 LYS A  32      63.280  47.510  23.140  1.00  0.00            
ATOM    474  CD  LYS A  32      61.460  48.660  23.020  1.00  0.00            
ATOM    475  HD1 LYS A  32      61.090  48.170  22.080  1.00  0.00            
ATOM    476  HD2 LYS A  32      60.570  48.870  23.650  1.00  0.00            
ATOM    477  CE  LYS A  32      62.230  49.920  22.640  1.00  0.00            
ATOM    478  HE1 LYS A  32      62.640  50.410  23.550  1.00  0.00            
ATOM    479  HE2 LYS A  32      63.080  49.680  21.960  1.00  0.00            
ATOM    480  NZ  LYS A  32      61.350  50.890  21.940  1.00  0.00            
ATOM    481  HZ1 LYS A  32      61.890  51.740  21.670  1.00  0.00            
ATOM    482  HZ2 LYS A  32      60.980  50.440  21.080  1.00  0.00            
ATOM    483  HZ3 LYS A  32      60.560  51.160  22.550  1.00  0.00            
ATOM    484  C   LYS A  32      62.060  43.760  24.030  1.00  0.00            
ATOM    485  O   LYS A  32      62.170  43.450  22.850  1.00  0.00            
ATOM    486  N   VAL A  33      61.500  42.920  24.930  1.00  0.00            
ATOM    487  HN  VAL A  33      61.480  43.140  25.910  1.00  0.00            
ATOM    488  CA  VAL A  33      61.050  41.580  24.580  1.00  0.00            
ATOM    489  HA  VAL A  33      60.940  41.500  23.510  1.00  0.00            
ATOM    490  CB  VAL A  33      62.010  40.480  25.070  1.00  0.00            
ATOM    491  HB  VAL A  33      62.010  40.460  26.180  1.00  0.00            
ATOM    492  CG1 VAL A  33      61.570  39.100  24.530  1.00  0.00            
ATOM    493 1HG1 VAL A  33      62.290  38.330  24.850  1.00  0.00            
ATOM    494 2HG1 VAL A  33      60.570  38.810  24.910  1.00  0.00            
ATOM    495 3HG1 VAL A  33      61.540  39.110  23.420  1.00  0.00            
ATOM    496  CG2 VAL A  33      63.440  40.780  24.590  1.00  0.00            
ATOM    497 1HG2 VAL A  33      64.120  39.950  24.890  1.00  0.00            
ATOM    498 2HG2 VAL A  33      63.470  40.870  23.490  1.00  0.00            
ATOM    499 3HG2 VAL A  33      63.830  41.720  25.040  1.00  0.00            
ATOM    500  C   VAL A  33      59.680  41.320  25.200  1.00  0.00            
ATOM    501  O   VAL A  33      59.470  41.540  26.390  1.00  0.00            
ATOM    502  N   GLN A  34      58.690  40.850  24.410  1.00  0.00            
ATOM    503  HN  GLN A  34      58.840  40.670  23.440  1.00  0.00            
ATOM    504  CA  GLN A  34      57.360  40.530  24.900  1.00  0.00            
ATOM    505  HA  GLN A  34      57.390  40.440  25.980  1.00  0.00            
ATOM    506  CB  GLN A  34      56.310  41.620  24.520  1.00  0.00            
ATOM    507  HB1 GLN A  34      55.850  41.370  23.530  1.00  0.00            
ATOM    508  HB2 GLN A  34      55.500  41.600  25.290  1.00  0.00            
ATOM    509  CG  GLN A  34      56.900  43.050  24.410  1.00  0.00            
ATOM    510  HG1 GLN A  34      57.450  43.310  25.340  1.00  0.00            
ATOM    511  HG2 GLN A  34      57.620  43.080  23.570  1.00  0.00            
ATOM    512  CD  GLN A  34      55.890  44.170  24.160  1.00  0.00            
ATOM    513  OE1 GLN A  34      56.270  45.340  24.120  1.00  0.00            
ATOM    514  NE2 GLN A  34      54.590  43.840  23.960  1.00  0.00            
ATOM    515 1HE2 GLN A  34      54.330  42.880  23.940  1.00  0.00            
ATOM    516 2HE2 GLN A  34      53.960  44.580  23.780  1.00  0.00            
ATOM    517  C   GLN A  34      56.900  39.190  24.340  1.00  0.00            
ATOM    518  O   GLN A  34      56.920  38.990  23.130  1.00  0.00            
ATOM    519  N   ILE A  35      56.490  38.230  25.190  1.00  0.00            
ATOM    520  HN  ILE A  35      56.520  38.380  26.190  1.00  0.00            
ATOM    521  CA  ILE A  35      56.010  36.920  24.750  1.00  0.00            
ATOM    522  HA  ILE A  35      55.850  36.940  23.680  1.00  0.00            
ATOM    523  CB  ILE A  35      56.990  35.780  25.060  1.00  0.00            
ATOM    524  HB  ILE A  35      57.100  35.690  26.160  1.00  0.00            
ATOM    525  CG2 ILE A  35      56.430  34.440  24.500  1.00  0.00            
ATOM    526 1HG2 ILE A  35      57.120  33.600  24.720  1.00  0.00            
ATOM    527 2HG2 ILE A  35      55.450  34.170  24.960  1.00  0.00            
ATOM    528 3HG2 ILE A  35      56.300  34.500  23.400  1.00  0.00            
ATOM    529  CG1 ILE A  35      58.390  36.080  24.470  1.00  0.00            
ATOM    530 1HG1 ILE A  35      58.300  36.170  23.360  1.00  0.00            
ATOM    531 2HG1 ILE A  35      58.750  37.060  24.850  1.00  0.00            
ATOM    532  CD  ILE A  35      59.460  35.030  24.810  1.00  0.00            
ATOM    533  HD1 ILE A  35      60.440  35.340  24.390  1.00  0.00            
ATOM    534  HD2 ILE A  35      59.560  34.920  25.910  1.00  0.00            
ATOM    535  HD3 ILE A  35      59.200  34.040  24.380  1.00  0.00            
ATOM    536  C   ILE A  35      54.660  36.630  25.390  1.00  0.00            
ATOM    537  O   ILE A  35      54.490  36.690  26.610  1.00  0.00            
ATOM    538  N   ILE A  36      53.620  36.310  24.580  1.00  0.00            
ATOM    539  HN  ILE A  36      53.730  36.260  23.600  1.00  0.00            
ATOM    540  CA  ILE A  36      52.290  36.000  25.090  1.00  0.00            
ATOM    541  HA  ILE A  36      52.330  35.860  26.160  1.00  0.00            
ATOM    542  CB  ILE A  36      51.250  37.080  24.790  1.00  0.00            
ATOM    543  HB  ILE A  36      51.150  37.190  23.680  1.00  0.00            
ATOM    544  CG2 ILE A  36      49.880  36.680  25.390  1.00  0.00            
ATOM    545 1HG2 ILE A  36      49.130  37.470  25.180  1.00  0.00            
ATOM    546 2HG2 ILE A  36      49.510  35.740  24.930  1.00  0.00            
ATOM    547 3HG2 ILE A  36      49.970  36.540  26.480  1.00  0.00            
ATOM    548  CG1 ILE A  36      51.710  38.450  25.350  1.00  0.00            
ATOM    549 1HG1 ILE A  36      51.820  38.370  26.450  1.00  0.00            
ATOM    550 2HG1 ILE A  36      52.720  38.700  24.940  1.00  0.00            
ATOM    551  CD  ILE A  36      50.780  39.620  25.000  1.00  0.00            
ATOM    552  HD1 ILE A  36      51.190  40.570  25.390  1.00  0.00            
ATOM    553  HD2 ILE A  36      50.660  39.710  23.900  1.00  0.00            
ATOM    554  HD3 ILE A  36      49.770  39.480  25.450  1.00  0.00            
ATOM    555  C   ILE A  36      51.840  34.680  24.500  1.00  0.00            
ATOM    556  O   ILE A  36      51.830  34.500  23.280  1.00  0.00            
ATOM    557  N   ASN A  37      51.450  33.690  25.330  1.00  0.00            
ATOM    558  HN  ASN A  37      51.490  33.850  26.330  1.00  0.00            
ATOM    559  CA  ASN A  37      50.950  32.410  24.860  1.00  0.00            
ATOM    560  HA  ASN A  37      50.780  32.450  23.790  1.00  0.00            
ATOM    561  CB  ASN A  37      51.920  31.240  25.160  1.00  0.00            
ATOM    562  HB1 ASN A  37      51.980  31.070  26.260  1.00  0.00            
ATOM    563  HB2 ASN A  37      51.580  30.300  24.690  1.00  0.00            
ATOM    564  CG  ASN A  37      53.350  31.520  24.690  1.00  0.00            
ATOM    565  OD1 ASN A  37      54.300  31.410  25.460  1.00  0.00            
ATOM    566  ND2 ASN A  37      53.530  31.910  23.410  1.00  0.00            
ATOM    567 1HD2 ASN A  37      52.760  32.200  22.860  1.00  0.00            
ATOM    568 2HD2 ASN A  37      54.470  32.070  23.120  1.00  0.00            
ATOM    569  C   ASN A  37      49.600  32.120  25.500  1.00  0.00            
ATOM    570  O   ASN A  37      49.440  32.180  26.710  1.00  0.00            
ATOM    571  N   LYS A  38      48.570  31.810  24.680  1.00  0.00            
ATOM    572  HN  LYS A  38      48.680  31.740  23.700  1.00  0.00            
ATOM    573  CA  LYS A  38      47.230  31.540  25.180  1.00  0.00            
ATOM    574  HA  LYS A  38      47.250  31.420  26.250  1.00  0.00            
ATOM    575  CB  LYS A  38      46.220  32.670  24.790  1.00  0.00            
ATOM    576  HB1 LYS A  38      46.060  32.620  23.690  1.00  0.00            
ATOM    577  HB2 LYS A  38      45.250  32.440  25.280  1.00  0.00            
ATOM    578  CG  LYS A  38      46.640  34.120  25.140  1.00  0.00            
ATOM    579  HG1 LYS A  38      46.790  34.190  26.240  1.00  0.00            
ATOM    580  HG2 LYS A  38      47.630  34.310  24.670  1.00  0.00            
ATOM    581  CD  LYS A  38      45.650  35.220  24.650  1.00  0.00            
ATOM    582  HD1 LYS A  38      45.540  35.070  23.550  1.00  0.00            
ATOM    583  HD2 LYS A  38      44.660  35.020  25.110  1.00  0.00            
ATOM    584  CE  LYS A  38      46.090  36.690  24.920  1.00  0.00            
ATOM    585  HE1 LYS A  38      46.130  36.860  26.020  1.00  0.00            
ATOM    586  HE2 LYS A  38      47.100  36.850  24.500  1.00  0.00            
ATOM    587  NZ  LYS A  38      45.200  37.750  24.330  1.00  0.00            
ATOM    588  HZ1 LYS A  38      45.580  38.740  24.460  1.00  0.00            
ATOM    589  HZ2 LYS A  38      45.130  37.640  23.300  1.00  0.00            
ATOM    590  HZ3 LYS A  38      44.250  37.750  24.730  1.00  0.00            
ATOM    591  C   LYS A  38      46.770  30.200  24.590  1.00  0.00            
ATOM    592  O   LYS A  38      46.740  30.050  23.370  1.00  0.00            
ATOM    593  N   LYS A  39      46.420  29.200  25.420  1.00  0.00            
ATOM    594  HN  LYS A  39      46.480  29.310  26.410  1.00  0.00            
ATOM    595  CA  LYS A  39      45.900  27.920  24.940  1.00  0.00            
ATOM    596  HA  LYS A  39      45.720  27.960  23.880  1.00  0.00            
ATOM    597  CB  LYS A  39      46.870  26.730  25.240  1.00  0.00            
ATOM    598  HB1 LYS A  39      47.870  26.960  24.790  1.00  0.00            
ATOM    599  HB2 LYS A  39      47.010  26.640  26.340  1.00  0.00            
ATOM    600  CG  LYS A  39      46.350  25.400  24.650  1.00  0.00            
ATOM    601  HG1 LYS A  39      45.290  25.280  24.980  1.00  0.00            
ATOM    602  HG2 LYS A  39      46.330  25.470  23.540  1.00  0.00            
ATOM    603  CD  LYS A  39      47.050  24.100  25.080  1.00  0.00            
ATOM    604  HD1 LYS A  39      48.060  24.040  24.620  1.00  0.00            
ATOM    605  HD2 LYS A  39      47.150  24.090  26.180  1.00  0.00            
ATOM    606  CE  LYS A  39      46.150  22.950  24.600  1.00  0.00            
ATOM    607  HE1 LYS A  39      45.100  23.180  24.910  1.00  0.00            
ATOM    608  HE2 LYS A  39      46.160  22.860  23.500  1.00  0.00            
ATOM    609  NZ  LYS A  39      46.450  21.610  25.170  1.00  0.00            
ATOM    610  HZ1 LYS A  39      45.550  21.070  24.930  1.00  0.00            
ATOM    611  HZ2 LYS A  39      47.260  21.150  24.740  1.00  0.00            
ATOM    612  HZ3 LYS A  39      46.480  21.630  26.200  1.00  0.00            
ATOM    613  C   LYS A  39      44.570  27.610  25.620  1.00  0.00            
ATOM    614  O   LYS A  39      44.500  27.550  26.840  1.00  0.00            
ATOM    615  N   LEU A  40      43.490  27.350  24.850  1.00  0.00            
ATOM    616  HN  LEU A  40      43.530  27.380  23.850  1.00  0.00            
ATOM    617  CA  LEU A  40      42.230  26.880  25.400  1.00  0.00            
ATOM    618  HA  LEU A  40      42.320  26.730  26.460  1.00  0.00            
ATOM    619  CB  LEU A  40      41.050  27.860  25.140  1.00  0.00            
ATOM    620  HB1 LEU A  40      40.730  27.780  24.080  1.00  0.00            
ATOM    621  HB2 LEU A  40      40.190  27.530  25.770  1.00  0.00            
ATOM    622  CG  LEU A  40      41.310  29.360  25.420  1.00  0.00            
ATOM    623  HG  LEU A  40      42.080  29.720  24.710  1.00  0.00            
ATOM    624  CD1 LEU A  40      40.020  30.170  25.200  1.00  0.00            
ATOM    625 1HD1 LEU A  40      40.200  31.250  25.370  1.00  0.00            
ATOM    626 2HD1 LEU A  40      39.650  30.030  24.160  1.00  0.00            
ATOM    627 3HD1 LEU A  40      39.230  29.820  25.900  1.00  0.00            
ATOM    628  CD2 LEU A  40      41.800  29.650  26.840  1.00  0.00            
ATOM    629 1HD2 LEU A  40      41.950  30.740  27.000  1.00  0.00            
ATOM    630 2HD2 LEU A  40      41.030  29.300  27.550  1.00  0.00            
ATOM    631 3HD2 LEU A  40      42.750  29.130  27.080  1.00  0.00            
ATOM    632  C   LEU A  40      41.900  25.530  24.760  1.00  0.00            
ATOM    633  O   LEU A  40      42.050  25.380  23.550  1.00  0.00            
ATOM    634  N   ASP A  41      41.490  24.530  25.570  1.00  0.00            
ATOM    635  HN  ASP A  41      41.430  24.660  26.560  1.00  0.00            
ATOM    636  CA  ASP A  41      41.130  23.190  25.130  1.00  0.00            
ATOM    637  HA  ASP A  41      41.040  23.140  24.050  1.00  0.00            
ATOM    638  CB  ASP A  41      42.220  22.210  25.670  1.00  0.00            
ATOM    639  HB1 ASP A  41      43.070  22.800  26.070  1.00  0.00            
ATOM    640  HB2 ASP A  41      41.830  21.600  26.510  1.00  0.00            
ATOM    641  CG  ASP A  41      42.790  21.250  24.640  1.00  0.00            
ATOM    642  OD1 ASP A  41      44.010  20.920  24.760  1.00  0.00            
ATOM    643  OD2 ASP A  41      42.070  20.880  23.690  1.00  0.00            
ATOM    644  C   ASP A  41      39.750  22.900  25.760  1.00  0.00            
ATOM    645  O   ASP A  41      39.610  22.970  26.980  1.00  0.00            
ATOM    646  N   LEU A  42      38.660  22.640  24.990  1.00  0.00            
ATOM    647  HN  LEU A  42      38.760  22.470  24.010  1.00  0.00            
ATOM    648  CA  LEU A  42      37.310  22.600  25.560  1.00  0.00            
ATOM    649  HA  LEU A  42      37.380  22.380  26.620  1.00  0.00            
ATOM    650  CB  LEU A  42      36.440  23.880  25.320  1.00  0.00            
ATOM    651  HB1 LEU A  42      36.120  23.900  24.250  1.00  0.00            
ATOM    652  HB2 LEU A  42      35.510  23.780  25.940  1.00  0.00            
ATOM    653  CG  LEU A  42      36.990  25.280  25.610  1.00  0.00            
ATOM    654  HG  LEU A  42      37.850  25.490  24.930  1.00  0.00            
ATOM    655  CD1 LEU A  42      35.850  26.270  25.340  1.00  0.00            
ATOM    656 1HD1 LEU A  42      36.170  27.310  25.520  1.00  0.00            
ATOM    657 2HD1 LEU A  42      35.490  26.160  24.290  1.00  0.00            
ATOM    658 3HD1 LEU A  42      34.990  26.040  26.010  1.00  0.00            
ATOM    659  CD2 LEU A  42      37.450  25.480  27.050  1.00  0.00            
ATOM    660 1HD2 LEU A  42      37.780  26.520  27.230  1.00  0.00            
ATOM    661 2HD2 LEU A  42      36.590  25.260  27.710  1.00  0.00            
ATOM    662 3HD2 LEU A  42      38.270  24.800  27.330  1.00  0.00            
ATOM    663  C   LEU A  42      36.400  21.530  24.960  1.00  0.00            
ATOM    664  O   LEU A  42      36.610  21.040  23.850  1.00  0.00            
ATOM    665  N   SER A  43      35.250  21.260  25.640  1.00  0.00            
ATOM    666  HN  SER A  43      35.220  21.460  26.620  1.00  0.00            
ATOM    667  CA  SER A  43      34.010  20.890  24.960  1.00  0.00            
ATOM    668  HA  SER A  43      34.270  20.660  23.940  1.00  0.00            
ATOM    669  CB  SER A  43      33.370  19.560  25.460  1.00  0.00            
ATOM    670  HB1 SER A  43      32.450  19.340  24.890  1.00  0.00            
ATOM    671  HB2 SER A  43      34.110  18.740  25.260  1.00  0.00            
ATOM    672  OG  SER A  43      33.080  19.560  26.850  1.00  0.00            
ATOM    673  HG1 SER A  43      32.950  18.640  27.110  1.00  0.00            
ATOM    674  C   SER A  43      33.000  22.050  24.800  1.00  0.00            
ATOM    675  O   SER A  43      33.200  22.940  23.990  1.00  0.00            
ATOM    676  N   ASN A  44      31.820  22.040  25.470  1.00  0.00            
ATOM    677  HN  ASN A  44      31.700  21.380  26.210  1.00  0.00            
ATOM    678  CA  ASN A  44      30.620  22.760  25.000  1.00  0.00            
ATOM    679  HA  ASN A  44      30.860  23.330  24.110  1.00  0.00            
ATOM    680  CB  ASN A  44      29.460  21.770  24.700  1.00  0.00            
ATOM    681  HB1 ASN A  44      29.130  21.270  25.640  1.00  0.00            
ATOM    682  HB2 ASN A  44      28.580  22.310  24.300  1.00  0.00            
ATOM    683  CG  ASN A  44      29.780  20.640  23.720  1.00  0.00            
ATOM    684  OD1 ASN A  44      29.080  19.630  23.700  1.00  0.00            
ATOM    685  ND2 ASN A  44      30.830  20.780  22.880  1.00  0.00            
ATOM    686 1HD2 ASN A  44      31.440  21.560  22.960  1.00  0.00            
ATOM    687 2HD2 ASN A  44      31.000  20.020  22.260  1.00  0.00            
ATOM    688  C   ASN A  44      30.020  23.760  26.000  1.00  0.00            
ATOM    689  O   ASN A  44      29.590  23.400  27.090  1.00  0.00            
ATOM    690  N   VAL A  45      29.950  25.060  25.680  1.00  0.00            
ATOM    691  HN  VAL A  45      30.220  25.390  24.780  1.00  0.00            
ATOM    692  CA  VAL A  45      29.720  26.090  26.680  1.00  0.00            
ATOM    693  HA  VAL A  45      29.170  25.700  27.530  1.00  0.00            
ATOM    694  CB  VAL A  45      31.110  26.650  27.110  1.00  0.00            
ATOM    695  HB  VAL A  45      31.580  27.170  26.250  1.00  0.00            
ATOM    696  CG1 VAL A  45      30.990  27.600  28.290  1.00  0.00            
ATOM    697 1HG1 VAL A  45      31.960  28.030  28.580  1.00  0.00            
ATOM    698 2HG1 VAL A  45      30.290  28.410  28.060  1.00  0.00            
ATOM    699 3HG1 VAL A  45      30.580  27.060  29.150  1.00  0.00            
ATOM    700  CG2 VAL A  45      32.100  25.580  27.600  1.00  0.00            
ATOM    701 1HG2 VAL A  45      33.030  26.070  27.960  1.00  0.00            
ATOM    702 2HG2 VAL A  45      31.680  25.030  28.470  1.00  0.00            
ATOM    703 3HG2 VAL A  45      32.380  24.860  26.810  1.00  0.00            
ATOM    704  C   VAL A  45      28.890  27.240  26.090  1.00  0.00            
ATOM    705  O   VAL A  45      29.500  28.200  25.660  1.00  0.00            
ATOM    706  N   GLN A  46      27.530  27.240  25.990  1.00  0.00            
ATOM    707  HN  GLN A  46      26.980  26.490  26.340  1.00  0.00            
ATOM    708  CA  GLN A  46      26.780  28.300  25.280  1.00  0.00            
ATOM    709  HA  GLN A  46      27.200  28.340  24.280  1.00  0.00            
ATOM    710  CB  GLN A  46      25.270  27.980  25.120  1.00  0.00            
ATOM    711  HB1 GLN A  46      24.820  27.830  26.120  1.00  0.00            
ATOM    712  HB2 GLN A  46      24.750  28.860  24.660  1.00  0.00            
ATOM    713  CG  GLN A  46      25.000  26.760  24.200  1.00  0.00            
ATOM    714  HG1 GLN A  46      25.520  26.920  23.230  1.00  0.00            
ATOM    715  HG2 GLN A  46      25.380  25.830  24.660  1.00  0.00            
ATOM    716  CD  GLN A  46      23.520  26.580  23.860  1.00  0.00            
ATOM    717  OE1 GLN A  46      23.120  26.730  22.710  1.00  0.00            
ATOM    718  NE2 GLN A  46      22.680  26.240  24.860  1.00  0.00            
ATOM    719 1HE2 GLN A  46      22.980  26.280  25.820  1.00  0.00            
ATOM    720 2HE2 GLN A  46      21.720  26.120  24.630  1.00  0.00            
ATOM    721  C   GLN A  46      26.900  29.750  25.800  1.00  0.00            
ATOM    722  O   GLN A  46      26.630  30.020  26.970  1.00  0.00            
ATOM    723  N   SER A  47      27.260  30.710  24.900  1.00  0.00            
ATOM    724  HN  SER A  47      27.000  30.600  23.950  1.00  0.00            
ATOM    725  CA  SER A  47      28.520  31.450  25.000  1.00  0.00            
ATOM    726  HA  SER A  47      28.800  31.560  26.020  1.00  0.00            
ATOM    727  CB  SER A  47      29.640  30.780  24.140  1.00  0.00            
ATOM    728  HB1 SER A  47      30.450  31.480  23.820  1.00  0.00            
ATOM    729  HB2 SER A  47      30.170  30.040  24.760  1.00  0.00            
ATOM    730  OG  SER A  47      29.090  30.150  22.980  1.00  0.00            
ATOM    731  HG1 SER A  47      29.780  29.620  22.570  1.00  0.00            
ATOM    732  C   SER A  47      28.560  32.860  24.460  1.00  0.00            
ATOM    733  O   SER A  47      27.890  33.200  23.500  1.00  0.00            
ATOM    734  N   LYS A  48      29.500  33.650  25.050  1.00  0.00            
ATOM    735  HN  LYS A  48      29.870  33.390  25.940  1.00  0.00            
ATOM    736  CA  LYS A  48      30.280  34.680  24.350  1.00  0.00            
ATOM    737  HA  LYS A  48      30.440  34.350  23.330  1.00  0.00            
ATOM    738  CB  LYS A  48      29.640  36.100  24.360  1.00  0.00            
ATOM    739  HB1 LYS A  48      29.310  36.330  25.380  1.00  0.00            
ATOM    740  HB2 LYS A  48      30.400  36.860  24.070  1.00  0.00            
ATOM    741  CG  LYS A  48      28.470  36.210  23.370  1.00  0.00            
ATOM    742  HG1 LYS A  48      28.870  36.050  22.340  1.00  0.00            
ATOM    743  HG2 LYS A  48      27.750  35.380  23.580  1.00  0.00            
ATOM    744  CD  LYS A  48      27.630  37.480  23.440  1.00  0.00            
ATOM    745  HD1 LYS A  48      27.060  37.430  24.390  1.00  0.00            
ATOM    746  HD2 LYS A  48      28.290  38.380  23.460  1.00  0.00            
ATOM    747  CE  LYS A  48      26.640  37.520  22.270  1.00  0.00            
ATOM    748  HE1 LYS A  48      27.180  37.720  21.320  1.00  0.00            
ATOM    749  HE2 LYS A  48      26.120  36.540  22.200  1.00  0.00            
ATOM    750  NZ  LYS A  48      25.610  38.570  22.470  1.00  0.00            
ATOM    751  HZ1 LYS A  48      24.990  38.600  21.640  1.00  0.00            
ATOM    752  HZ2 LYS A  48      25.030  38.330  23.300  1.00  0.00            
ATOM    753  HZ3 LYS A  48      26.070  39.490  22.590  1.00  0.00            
ATOM    754  C   LYS A  48      31.660  34.780  25.010  1.00  0.00            
ATOM    755  O   LYS A  48      31.790  34.600  26.220  1.00  0.00            
ATOM    756  N   CYS A  49      32.720  35.090  24.230  1.00  0.00            
ATOM    757  HN  CYS A  49      32.630  35.210  23.240  1.00  0.00            
ATOM    758  CA  CYS A  49      34.040  35.420  24.750  1.00  0.00            
ATOM    759  HA  CYS A  49      33.960  35.640  25.800  1.00  0.00            
ATOM    760  CB  CYS A  49      35.090  34.290  24.550  1.00  0.00            
ATOM    761  HB1 CYS A  49      34.630  33.340  24.900  1.00  0.00            
ATOM    762  HB2 CYS A  49      35.290  34.170  23.460  1.00  0.00            
ATOM    763  SG  CYS A  49      36.650  34.570  25.460  1.00  0.00            
ATOM    764  HG1 CYS A  49      37.300  33.520  24.990  1.00  0.00            
ATOM    765  C   CYS A  49      34.510  36.680  24.040  1.00  0.00            
ATOM    766  O   CYS A  49      34.250  36.860  22.850  1.00  0.00            
ATOM    767  N   GLY A  50      35.190  37.590  24.760  1.00  0.00            
ATOM    768  HN  GLY A  50      35.330  37.460  25.750  1.00  0.00            
ATOM    769  CA  GLY A  50      35.850  38.750  24.160  1.00  0.00            
ATOM    770  HA1 GLY A  50      36.010  38.580  23.110  1.00  0.00            
ATOM    771  HA2 GLY A  50      35.240  39.620  24.370  1.00  0.00            
ATOM    772  C   GLY A  50      37.180  38.980  24.800  1.00  0.00            
ATOM    773  O   GLY A  50      37.340  38.830  26.010  1.00  0.00            
ATOM    774  N   SER A  51      38.190  39.410  24.020  1.00  0.00            
ATOM    775  HN  SER A  51      38.120  39.490  23.030  1.00  0.00            
ATOM    776  CA  SER A  51      39.470  39.830  24.560  1.00  0.00            
ATOM    777  HA  SER A  51      39.310  40.140  25.580  1.00  0.00            
ATOM    778  CB  SER A  51      40.570  38.740  24.600  1.00  0.00            
ATOM    779  HB1 SER A  51      41.520  39.180  24.970  1.00  0.00            
ATOM    780  HB2 SER A  51      40.240  37.960  25.320  1.00  0.00            
ATOM    781  OG  SER A  51      40.770  38.130  23.320  1.00  0.00            
ATOM    782  HG1 SER A  51      41.410  37.420  23.420  1.00  0.00            
ATOM    783  C   SER A  51      39.940  41.060  23.820  1.00  0.00            
ATOM    784  O   SER A  51      39.710  41.210  22.630  1.00  0.00            
ATOM    785  N   LYS A  52      40.560  42.010  24.550  1.00  0.00            
ATOM    786  HN  LYS A  52      40.720  41.880  25.520  1.00  0.00            
ATOM    787  CA  LYS A  52      41.050  43.230  23.930  1.00  0.00            
ATOM    788  HA  LYS A  52      41.260  43.040  22.890  1.00  0.00            
ATOM    789  CB  LYS A  52      40.030  44.390  24.070  1.00  0.00            
ATOM    790  HB1 LYS A  52      39.050  44.040  23.650  1.00  0.00            
ATOM    791  HB2 LYS A  52      39.870  44.590  25.150  1.00  0.00            
ATOM    792  CG  LYS A  52      40.470  45.660  23.330  1.00  0.00            
ATOM    793  HG1 LYS A  52      41.550  45.830  23.540  1.00  0.00            
ATOM    794  HG2 LYS A  52      40.380  45.510  22.230  1.00  0.00            
ATOM    795  CD  LYS A  52      39.740  46.940  23.760  1.00  0.00            
ATOM    796  HD1 LYS A  52      38.730  46.960  23.300  1.00  0.00            
ATOM    797  HD2 LYS A  52      39.630  46.910  24.870  1.00  0.00            
ATOM    798  CE  LYS A  52      40.590  48.150  23.340  1.00  0.00            
ATOM    799  HE1 LYS A  52      41.600  48.040  23.790  1.00  0.00            
ATOM    800  HE2 LYS A  52      40.690  48.200  22.230  1.00  0.00            
ATOM    801  NZ  LYS A  52      40.030  49.430  23.810  1.00  0.00            
ATOM    802  HZ1 LYS A  52      40.680  50.180  23.520  1.00  0.00            
ATOM    803  HZ2 LYS A  52      39.090  49.580  23.390  1.00  0.00            
ATOM    804  HZ3 LYS A  52      39.960  49.410  24.840  1.00  0.00            
ATOM    805  C   LYS A  52      42.370  43.650  24.570  1.00  0.00            
ATOM    806  O   LYS A  52      42.440  43.930  25.770  1.00  0.00            
ATOM    807  N   ASP A  53      43.420  43.780  23.750  1.00  0.00            
ATOM    808  HN  ASP A  53      43.330  43.580  22.780  1.00  0.00            
ATOM    809  CA  ASP A  53      44.790  43.960  24.190  1.00  0.00            
ATOM    810  HA  ASP A  53      44.830  44.030  25.260  1.00  0.00            
ATOM    811  CB  ASP A  53      45.660  42.730  23.690  1.00  0.00            
ATOM    812  HB1 ASP A  53      45.680  42.750  22.580  1.00  0.00            
ATOM    813  HB2 ASP A  53      46.690  42.860  24.060  1.00  0.00            
ATOM    814  CG  ASP A  53      45.210  41.290  24.080  1.00  0.00            
ATOM    815  OD1 ASP A  53      46.070  40.370  24.170  1.00  0.00            
ATOM    816  OD2 ASP A  53      43.990  41.020  24.230  1.00  0.00            
ATOM    817  C   ASP A  53      45.260  45.330  23.600  1.00  0.00            
ATOM    818  O   ASP A  53      45.080  45.600  22.420  1.00  0.00            
ATOM    819  N   ASN A  54      45.800  46.290  24.410  1.00  0.00            
ATOM    820  HN  ASN A  54      45.890  46.100  25.390  1.00  0.00            
ATOM    821  CA  ASN A  54      46.170  47.630  23.930  1.00  0.00            
ATOM    822  HA  ASN A  54      46.330  47.590  22.860  1.00  0.00            
ATOM    823  CB  ASN A  54      45.040  48.650  24.290  1.00  0.00            
ATOM    824  HB1 ASN A  54      44.180  48.080  24.710  1.00  0.00            
ATOM    825  HB2 ASN A  54      45.370  49.350  25.080  1.00  0.00            
ATOM    826  CG  ASN A  54      44.490  49.510  23.150  1.00  0.00            
ATOM    827  OD1 ASN A  54      43.270  49.630  23.000  1.00  0.00            
ATOM    828  ND2 ASN A  54      45.380  50.210  22.420  1.00  0.00            
ATOM    829 1HD2 ASN A  54      46.350  50.190  22.630  1.00  0.00            
ATOM    830 2HD2 ASN A  54      45.020  50.760  21.660  1.00  0.00            
ATOM    831  C   ASN A  54      47.490  48.140  24.570  1.00  0.00            
ATOM    832  O   ASN A  54      47.580  48.250  25.790  1.00  0.00            
ATOM    833  N   ILE A  55      48.520  48.490  23.770  1.00  0.00            
ATOM    834  HN  ILE A  55      48.470  48.440  22.780  1.00  0.00            
ATOM    835  CA  ILE A  55      49.870  48.810  24.280  1.00  0.00            
ATOM    836  HA  ILE A  55      49.820  48.960  25.350  1.00  0.00            
ATOM    837  CB  ILE A  55      50.850  47.660  24.010  1.00  0.00            
ATOM    838  HB  ILE A  55      50.950  47.520  22.910  1.00  0.00            
ATOM    839  CG2 ILE A  55      52.240  47.980  24.600  1.00  0.00            
ATOM    840 1HG2 ILE A  55      52.950  47.140  24.410  1.00  0.00            
ATOM    841 2HG2 ILE A  55      52.690  48.880  24.140  1.00  0.00            
ATOM    842 3HG2 ILE A  55      52.180  48.130  25.700  1.00  0.00            
ATOM    843  CG1 ILE A  55      50.310  46.320  24.590  1.00  0.00            
ATOM    844 1HG1 ILE A  55      50.210  46.420  25.700  1.00  0.00            
ATOM    845 2HG1 ILE A  55      49.290  46.120  24.190  1.00  0.00            
ATOM    846  CD  ILE A  55      51.160  45.080  24.270  1.00  0.00            
ATOM    847  HD1 ILE A  55      50.670  44.170  24.670  1.00  0.00            
ATOM    848  HD2 ILE A  55      51.260  44.960  23.170  1.00  0.00            
ATOM    849  HD3 ILE A  55      52.170  45.160  24.720  1.00  0.00            
ATOM    850  C   ILE A  55      50.390  50.130  23.660  1.00  0.00            
ATOM    851  O   ILE A  55      50.210  50.370  22.470  1.00  0.00            
ATOM    852  N   LYS A  56      51.040  51.040  24.450  1.00  0.00            
ATOM    853  HN  LYS A  56      51.100  50.860  25.440  1.00  0.00            
ATOM    854  CA  LYS A  56      51.640  52.280  23.950  1.00  0.00            
ATOM    855  HA  LYS A  56      51.860  52.140  22.900  1.00  0.00            
ATOM    856  CB  LYS A  56      50.660  53.500  24.100  1.00  0.00            
ATOM    857  HB1 LYS A  56      49.690  53.200  23.640  1.00  0.00            
ATOM    858  HB2 LYS A  56      50.480  53.660  25.180  1.00  0.00            
ATOM    859  CG  LYS A  56      51.110  54.830  23.440  1.00  0.00            
ATOM    860  HG1 LYS A  56      52.110  55.100  23.820  1.00  0.00            
ATOM    861  HG2 LYS A  56      51.190  54.670  22.340  1.00  0.00            
ATOM    862  CD  LYS A  56      50.160  56.040  23.690  1.00  0.00            
ATOM    863  HD1 LYS A  56      49.160  55.810  23.250  1.00  0.00            
ATOM    864  HD2 LYS A  56      50.030  56.150  24.790  1.00  0.00            
ATOM    865  CE  LYS A  56      50.680  57.380  23.090  1.00  0.00            
ATOM    866  HE1 LYS A  56      51.740  57.530  23.400  1.00  0.00            
ATOM    867  HE2 LYS A  56      50.650  57.330  21.980  1.00  0.00            
ATOM    868  NZ  LYS A  56      49.930  58.580  23.520  1.00  0.00            
ATOM    869  HZ1 LYS A  56      50.390  59.440  23.070  1.00  0.00            
ATOM    870  HZ2 LYS A  56      48.960  58.660  23.180  1.00  0.00            
ATOM    871  HZ3 LYS A  56      49.980  58.810  24.530  1.00  0.00            
ATOM    872  C   LYS A  56      52.970  52.600  24.650  1.00  0.00            
ATOM    873  O   LYS A  56      53.110  52.490  25.870  1.00  0.00            
ATOM    874  N   HSD A  57      54.030  53.020  23.920  1.00  0.00            
ATOM    875  HN  HSD A  57      53.950  53.110  22.930  1.00  0.00            
ATOM    876  CA  HSD A  57      55.320  53.400  24.510  1.00  0.00            
ATOM    877  HA  HSD A  57      55.350  53.150  25.560  1.00  0.00            
ATOM    878  CB  HSD A  57      56.530  52.760  23.770  1.00  0.00            
ATOM    879  HB1 HSD A  57      56.490  53.070  22.700  1.00  0.00            
ATOM    880  HB2 HSD A  57      57.470  53.160  24.210  1.00  0.00            
ATOM    881  ND1 HSD A  57      57.750  50.650  23.190  1.00  0.00            
ATOM    882  HD1 HSD A  57      58.340  51.110  22.550  1.00  0.00            
ATOM    883  CG  HSD A  57      56.660  51.260  23.790  1.00  0.00            
ATOM    884  CE1 HSD A  57      57.540  49.310  23.290  1.00  0.00            
ATOM    885  HE1 HSD A  57      58.190  48.540  22.860  1.00  0.00            
ATOM    886  NE2 HSD A  57      56.420  49.040  23.910  1.00  0.00            
ATOM    887  CD2 HSD A  57      55.840  50.260  24.200  1.00  0.00            
ATOM    888  HD2 HSD A  57      54.860  50.280  24.650  1.00  0.00            
ATOM    889  C   HSD A  57      55.560  54.910  24.360  1.00  0.00            
ATOM    890  O   HSD A  57      55.440  55.430  23.260  1.00  0.00            
ATOM    891  N   VAL A  58      55.960  55.620  25.440  1.00  0.00            
ATOM    892  HN  VAL A  58      55.910  55.250  26.370  1.00  0.00            
ATOM    893  CA  VAL A  58      56.190  57.070  25.450  1.00  0.00            
ATOM    894  HA  VAL A  58      56.280  57.430  24.440  1.00  0.00            
ATOM    895  CB  VAL A  58      55.020  57.810  26.130  1.00  0.00            
ATOM    896  HB  VAL A  58      55.030  57.620  27.230  1.00  0.00            
ATOM    897  CG1 VAL A  58      55.090  59.330  25.900  1.00  0.00            
ATOM    898 1HG1 VAL A  58      54.220  59.830  26.390  1.00  0.00            
ATOM    899 2HG1 VAL A  58      56.010  59.780  26.330  1.00  0.00            
ATOM    900 3HG1 VAL A  58      55.060  59.570  24.820  1.00  0.00            
ATOM    901  CG2 VAL A  58      53.660  57.320  25.580  1.00  0.00            
ATOM    902 1HG2 VAL A  58      52.850  57.920  26.040  1.00  0.00            
ATOM    903 2HG2 VAL A  58      53.630  57.470  24.490  1.00  0.00            
ATOM    904 3HG2 VAL A  58      53.480  56.250  25.820  1.00  0.00            
ATOM    905  C   VAL A  58      57.510  57.460  26.180  1.00  0.00            
ATOM    906  O   VAL A  58      57.480  58.110  27.220  1.00  0.00            
ATOM    907  N   PRO A  59      58.700  57.030  25.770  1.00  0.00            
ATOM    908  CD  PRO A  59      59.090  55.700  26.280  1.00  0.00            
ATOM    909  HD1 PRO A  59      58.720  54.930  25.580  1.00  0.00            
ATOM    910  HD2 PRO A  59      58.660  55.550  27.300  1.00  0.00            
ATOM    911  CA  PRO A  59      59.870  57.890  25.970  1.00  0.00            
ATOM    912  HA  PRO A  59      59.910  58.150  27.000  1.00  0.00            
ATOM    913  CB  PRO A  59      61.020  56.960  25.620  1.00  0.00            
ATOM    914  HB1 PRO A  59      61.030  56.770  24.520  1.00  0.00            
ATOM    915  HB2 PRO A  59      62.000  57.370  25.940  1.00  0.00            
ATOM    916  CG  PRO A  59      60.620  55.700  26.380  1.00  0.00            
ATOM    917  HG1 PRO A  59      61.100  54.800  25.960  1.00  0.00            
ATOM    918  HG2 PRO A  59      60.930  55.830  27.450  1.00  0.00            
ATOM    919  C   PRO A  59      60.030  59.190  25.190  1.00  0.00            
ATOM    920  O   PRO A  59      59.740  59.240  24.000  1.00  0.00            
ATOM    921  N   GLY A  60      60.610  60.220  25.850  1.00  0.00            
ATOM    922  HN  GLY A  60      60.700  60.160  26.850  1.00  0.00            
ATOM    923  CA  GLY A  60      61.200  61.370  25.180  1.00  0.00            
ATOM    924  HA1 GLY A  60      61.390  61.130  24.140  1.00  0.00            
ATOM    925  HA2 GLY A  60      60.530  62.200  25.310  1.00  0.00            
ATOM    926  C   GLY A  60      62.520  61.760  25.800  1.00  0.00            
ATOM    927  O   GLY A  60      62.620  61.960  27.010  1.00  0.00            
ATOM    928  N   GLY A  61      63.580  61.910  24.980  1.00  0.00            
ATOM    929  HN  GLY A  61      63.480  61.740  24.000  1.00  0.00            
ATOM    930  CA  GLY A  61      64.900  62.400  25.400  1.00  0.00            
ATOM    931  HA1 GLY A  61      64.940  62.500  26.480  1.00  0.00            
ATOM    932  HA2 GLY A  61      65.630  61.710  25.010  1.00  0.00            
ATOM    933  C   GLY A  61      65.200  63.750  24.800  1.00  0.00            
ATOM    934  O   GLY A  61      64.570  64.170  23.830  1.00  0.00            
ATOM    935  N   GLY A  62      66.200  64.460  25.350  1.00  0.00            
ATOM    936  HN  GLY A  62      66.650  64.170  26.190  1.00  0.00            
ATOM    937  CA  GLY A  62      66.700  65.700  24.750  1.00  0.00            
ATOM    938  HA1 GLY A  62      66.840  65.560  23.690  1.00  0.00            
ATOM    939  HA2 GLY A  62      66.010  66.490  25.000  1.00  0.00            
ATOM    940  C   GLY A  62      68.020  66.050  25.370  1.00  0.00            
ATOM    941  O   GLY A  62      68.140  66.040  26.590  1.00  0.00            
ATOM    942  N   SER A  63      69.050  66.340  24.560  1.00  0.00            
ATOM    943  HN  SER A  63      68.980  66.340  23.570  1.00  0.00            
ATOM    944  CA  SER A  63      70.390  66.610  25.050  1.00  0.00            
ATOM    945  HA  SER A  63      70.380  66.740  26.120  1.00  0.00            
ATOM    946  CB  SER A  63      71.380  65.460  24.740  1.00  0.00            
ATOM    947  HB1 SER A  63      72.420  65.750  25.030  1.00  0.00            
ATOM    948  HB2 SER A  63      71.080  64.580  25.350  1.00  0.00            
ATOM    949  OG  SER A  63      71.350  65.070  23.360  1.00  0.00            
ATOM    950  HG1 SER A  63      72.030  64.410  23.210  1.00  0.00            
ATOM    951  C   SER A  63      70.930  67.920  24.470  1.00  0.00            
ATOM    952  O   SER A  63      70.850  68.170  23.270  1.00  0.00            
ATOM    953  N   VAL A  64      71.460  68.810  25.340  1.00  0.00            
ATOM    954  HN  VAL A  64      71.440  68.620  26.320  1.00  0.00            
ATOM    955  CA  VAL A  64      71.970  70.110  24.940  1.00  0.00            
ATOM    956  HA  VAL A  64      72.010  70.180  23.860  1.00  0.00            
ATOM    957  CB  VAL A  64      71.090  71.260  25.460  1.00  0.00            
ATOM    958  HB  VAL A  64      71.120  71.260  26.580  1.00  0.00            
ATOM    959  CG1 VAL A  64      71.590  72.620  24.940  1.00  0.00            
ATOM    960 1HG1 VAL A  64      70.930  73.430  25.310  1.00  0.00            
ATOM    961 2HG1 VAL A  64      72.620  72.840  25.290  1.00  0.00            
ATOM    962 3HG1 VAL A  64      71.580  72.640  23.830  1.00  0.00            
ATOM    963  CG2 VAL A  64      69.630  71.040  25.020  1.00  0.00            
ATOM    964 1HG2 VAL A  64      69.000  71.890  25.370  1.00  0.00            
ATOM    965 2HG2 VAL A  64      69.570  70.980  23.920  1.00  0.00            
ATOM    966 3HG2 VAL A  64      69.210  70.110  25.460  1.00  0.00            
ATOM    967  C   VAL A  64      73.380  70.290  25.460  1.00  0.00            
ATOM    968  O   VAL A  64      73.640  70.140  26.660  1.00  0.00            
ATOM    969  N   GLN A  65      74.360  70.620  24.590  1.00  0.00            
ATOM    970  HN  GLN A  65      74.160  70.720  23.610  1.00  0.00            
ATOM    971  CA  GLN A  65      75.730  70.890  24.980  1.00  0.00            
ATOM    972  HA  GLN A  65      75.810  70.960  26.050  1.00  0.00            
ATOM    973  CB  GLN A  65      76.680  69.780  24.470  1.00  0.00            
ATOM    974  HB1 GLN A  65      76.260  68.790  24.770  1.00  0.00            
ATOM    975  HB2 GLN A  65      76.690  69.810  23.360  1.00  0.00            
ATOM    976  CG  GLN A  65      78.130  69.880  25.010  1.00  0.00            
ATOM    977  HG1 GLN A  65      78.500  70.930  24.930  1.00  0.00            
ATOM    978  HG2 GLN A  65      78.190  69.580  26.070  1.00  0.00            
ATOM    979  CD  GLN A  65      79.110  69.040  24.190  1.00  0.00            
ATOM    980  OE1 GLN A  65      80.060  69.550  23.600  1.00  0.00            
ATOM    981  NE2 GLN A  65      78.880  67.710  24.130  1.00  0.00            
ATOM    982 1HE2 GLN A  65      78.090  67.320  24.600  1.00  0.00            
ATOM    983 2HE2 GLN A  65      79.520  67.170  23.590  1.00  0.00            
ATOM    984  C   GLN A  65      76.180  72.220  24.390  1.00  0.00            
ATOM    985  O   GLN A  65      76.080  72.430  23.190  1.00  0.00            
ATOM    986  N   ILE A  66      76.680  73.160  25.230  1.00  0.00            
ATOM    987  HN  ILE A  66      76.690  73.000  26.220  1.00  0.00            
ATOM    988  CA  ILE A  66      77.170  74.460  24.780  1.00  0.00            
ATOM    989  HA  ILE A  66      77.270  74.450  23.700  1.00  0.00            
ATOM    990  CB  ILE A  66      76.250  75.620  25.180  1.00  0.00            
ATOM    991  HB  ILE A  66      76.210  75.670  26.290  1.00  0.00            
ATOM    992  CG2 ILE A  66      76.830  76.950  24.630  1.00  0.00            
ATOM    993 1HG2 ILE A  66      76.170  77.800  24.910  1.00  0.00            
ATOM    994 2HG2 ILE A  66      77.830  77.170  25.050  1.00  0.00            
ATOM    995 3HG2 ILE A  66      76.900  76.910  23.520  1.00  0.00            
ATOM    996  CG1 ILE A  66      74.810  75.380  24.660  1.00  0.00            
ATOM    997 1HG1 ILE A  66      74.830  75.350  23.540  1.00  0.00            
ATOM    998 2HG1 ILE A  66      74.450  74.390  25.010  1.00  0.00            
ATOM    999  CD  ILE A  66      73.790  76.430  25.120  1.00  0.00            
ATOM   1000  HD1 ILE A  66      72.780  76.180  24.750  1.00  0.00            
ATOM   1001  HD2 ILE A  66      73.750  76.460  26.230  1.00  0.00            
ATOM   1002  HD3 ILE A  66      74.050  77.440  24.750  1.00  0.00            
ATOM   1003  C   ILE A  66      78.570  74.690  25.350  1.00  0.00            
ATOM   1004  O   ILE A  66      78.770  74.650  26.560  1.00  0.00            
ATOM   1005  N   VAL A  67      79.580  74.960  24.490  1.00  0.00            
ATOM   1006  HN  VAL A  67      79.420  74.990  23.510  1.00  0.00            
ATOM   1007  CA  VAL A  67      80.960  75.130  24.910  1.00  0.00            
ATOM   1008  HA  VAL A  67      81.020  75.160  25.990  1.00  0.00            
ATOM   1009  CB  VAL A  67      81.850  73.990  24.410  1.00  0.00            
ATOM   1010  HB  VAL A  67      81.850  73.980  23.300  1.00  0.00            
ATOM   1011  CG1 VAL A  67      83.290  74.160  24.920  1.00  0.00            
ATOM   1012 1HG1 VAL A  67      83.890  73.280  24.590  1.00  0.00            
ATOM   1013 2HG1 VAL A  67      83.770  75.070  24.510  1.00  0.00            
ATOM   1014 3HG1 VAL A  67      83.310  74.200  26.030  1.00  0.00            
ATOM   1015  CG2 VAL A  67      81.300  72.640  24.910  1.00  0.00            
ATOM   1016 1HG2 VAL A  67      81.960  71.810  24.570  1.00  0.00            
ATOM   1017 2HG2 VAL A  67      81.240  72.620  26.020  1.00  0.00            
ATOM   1018 3HG2 VAL A  67      80.280  72.440  24.500  1.00  0.00            
ATOM   1019  C   VAL A  67      81.520  76.460  24.400  1.00  0.00            
ATOM   1020  O   VAL A  67      81.470  76.750  23.210  1.00  0.00            
ATOM   1021  N   TYR A  68      82.060  77.310  25.300  1.00  0.00            
ATOM   1022  HN  TYR A  68      82.020  77.080  26.280  1.00  0.00            
ATOM   1023  CA  TYR A  68      82.660  78.590  24.960  1.00  0.00            
ATOM   1024  HA  TYR A  68      82.760  78.640  23.890  1.00  0.00            
ATOM   1025  CB  TYR A  68      81.650  79.740  25.360  1.00  0.00            
ATOM   1026  HB1 TYR A  68      81.320  80.210  24.400  1.00  0.00            
ATOM   1027  HB2 TYR A  68      80.740  79.230  25.760  1.00  0.00            
ATOM   1028  CG  TYR A  68      81.900  80.910  26.310  1.00  0.00            
ATOM   1029  CD1 TYR A  68      83.050  81.180  27.090  1.00  0.00            
ATOM   1030  HD1 TYR A  68      83.900  80.540  27.110  1.00  0.00            
ATOM   1031  CE1 TYR A  68      83.140  82.330  27.880  1.00  0.00            
ATOM   1032  HE1 TYR A  68      84.040  82.520  28.450  1.00  0.00            
ATOM   1033  CZ  TYR A  68      82.090  83.240  27.930  1.00  0.00            
ATOM   1034  OH  TYR A  68      82.230  84.410  28.690  1.00  0.00            
ATOM   1035  HH  TYR A  68      81.380  84.870  28.660  1.00  0.00            
ATOM   1036  CD2 TYR A  68      80.840  81.830  26.420  1.00  0.00            
ATOM   1037  HD2 TYR A  68      79.930  81.650  25.860  1.00  0.00            
ATOM   1038  CE2 TYR A  68      80.920  82.980  27.220  1.00  0.00            
ATOM   1039  HE2 TYR A  68      80.090  83.660  27.270  1.00  0.00            
ATOM   1040  C   TYR A  68      84.100  78.650  25.490  1.00  0.00            
ATOM   1041  O   TYR A  68      84.370  78.320  26.650  1.00  0.00            
ATOM   1042  N   LYS A  69      85.090  79.050  24.650  1.00  0.00            
ATOM   1043  HN  LYS A  69      84.900  79.230  23.690  1.00  0.00            
ATOM   1044  CA  LYS A  69      86.490  79.160  25.060  1.00  0.00            
ATOM   1045  HA  LYS A  69      86.530  79.290  26.130  1.00  0.00            
ATOM   1046  CB  LYS A  69      87.310  77.850  24.700  1.00  0.00            
ATOM   1047  HB1 LYS A  69      87.460  77.830  23.590  1.00  0.00            
ATOM   1048  HB2 LYS A  69      88.310  77.940  25.170  1.00  0.00            
ATOM   1049  CG  LYS A  69      86.680  76.490  25.100  1.00  0.00            
ATOM   1050  HG1 LYS A  69      86.390  76.530  26.170  1.00  0.00            
ATOM   1051  HG2 LYS A  69      85.740  76.370  24.510  1.00  0.00            
ATOM   1052  CD  LYS A  69      87.560  75.220  24.850  1.00  0.00            
ATOM   1053  HD1 LYS A  69      87.960  75.270  23.810  1.00  0.00            
ATOM   1054  HD2 LYS A  69      88.420  75.260  25.550  1.00  0.00            
ATOM   1055  CE  LYS A  69      86.800  73.870  25.010  1.00  0.00            
ATOM   1056  HE1 LYS A  69      86.320  73.860  26.010  1.00  0.00            
ATOM   1057  HE2 LYS A  69      86.000  73.810  24.240  1.00  0.00            
ATOM   1058  NZ  LYS A  69      87.610  72.630  24.900  1.00  0.00            
ATOM   1059  HZ1 LYS A  69      87.050  71.820  25.290  1.00  0.00            
ATOM   1060  HZ2 LYS A  69      87.860  72.300  23.930  1.00  0.00            
ATOM   1061  HZ3 LYS A  69      88.460  72.620  25.490  1.00  0.00            
ATOM   1062  C   LYS A  69      87.200  80.400  24.440  1.00  0.00            
ATOM   1063  O   LYS A  69      87.840  80.240  23.400  1.00  0.00            
ATOM   1064  N   PRO A  70      87.150  81.650  24.960  1.00  0.00            
ATOM   1065  CD  PRO A  70      86.020  82.080  25.780  1.00  0.00            
ATOM   1066  HD1 PRO A  70      86.180  81.790  26.840  1.00  0.00            
ATOM   1067  HD2 PRO A  70      85.080  81.610  25.400  1.00  0.00            
ATOM   1068  CA  PRO A  70      87.750  82.810  24.270  1.00  0.00            
ATOM   1069  HA  PRO A  70      88.060  82.560  23.260  1.00  0.00            
ATOM   1070  CB  PRO A  70      86.610  83.850  24.280  1.00  0.00            
ATOM   1071  HB1 PRO A  70      86.980  84.890  24.190  1.00  0.00            
ATOM   1072  HB2 PRO A  70      85.910  83.640  23.440  1.00  0.00            
ATOM   1073  CG  PRO A  70      85.910  83.600  25.610  1.00  0.00            
ATOM   1074  HG1 PRO A  70      86.490  84.110  26.410  1.00  0.00            
ATOM   1075  HG2 PRO A  70      84.860  83.950  25.630  1.00  0.00            
ATOM   1076  C   PRO A  70      88.980  83.390  24.980  1.00  0.00            
ATOM   1077  O   PRO A  70      88.990  83.530  26.210  1.00  0.00            
ATOM   1078  N   VAL A  71      90.040  83.770  24.240  1.00  0.00            
ATOM   1079  HN  VAL A  71      90.030  83.680  23.250  1.00  0.00            
ATOM   1080  CA  VAL A  71      91.280  84.290  24.800  1.00  0.00            
ATOM   1081  HA  VAL A  71      91.170  84.410  25.870  1.00  0.00            
ATOM   1082  CB  VAL A  71      92.440  83.330  24.560  1.00  0.00            
ATOM   1083  HB  VAL A  71      92.630  83.230  23.470  1.00  0.00            
ATOM   1084  CG1 VAL A  71      93.730  83.840  25.250  1.00  0.00            
ATOM   1085 1HG1 VAL A  71      94.550  83.100  25.100  1.00  0.00            
ATOM   1086 2HG1 VAL A  71      94.060  84.800  24.810  1.00  0.00            
ATOM   1087 3HG1 VAL A  71      93.570  83.970  26.340  1.00  0.00            
ATOM   1088  CG2 VAL A  71      92.080  81.940  25.130  1.00  0.00            
ATOM   1089 1HG2 VAL A  71      92.940  81.240  25.010  1.00  0.00            
ATOM   1090 2HG2 VAL A  71      91.850  82.020  26.220  1.00  0.00            
ATOM   1091 3HG2 VAL A  71      91.210  81.500  24.610  1.00  0.00            
ATOM   1092  C   VAL A  71      91.580  85.670  24.220  1.00  0.00            
ATOM   1093  O   VAL A  71      91.450  85.890  23.020  1.00  0.00            
ATOM   1094  N   ASP A  72      91.950  86.650  25.080  1.00  0.00            
ATOM   1095  HN  ASP A  72      92.000  86.460  26.060  1.00  0.00            
ATOM   1096  CA  ASP A  72      92.220  88.030  24.700  1.00  0.00            
ATOM   1097  HA  ASP A  72      92.340  88.110  23.620  1.00  0.00            
ATOM   1098  CB  ASP A  72      91.000  88.860  25.220  1.00  0.00            
ATOM   1099  HB1 ASP A  72      90.100  88.220  25.100  1.00  0.00            
ATOM   1100  HB2 ASP A  72      91.130  89.060  26.300  1.00  0.00            
ATOM   1101  CG  ASP A  72      90.710  90.160  24.500  1.00  0.00            
ATOM   1102  OD1 ASP A  72      89.850  90.940  25.010  1.00  0.00            
ATOM   1103  OD2 ASP A  72      91.240  90.430  23.400  1.00  0.00            
ATOM   1104  C   ASP A  72      93.540  88.460  25.380  1.00  0.00            
ATOM   1105  O   ASP A  72      93.590  88.540  26.610  1.00  0.00            
ATOM   1106  N   LEU A  73      94.650  88.710  24.660  1.00  0.00            
ATOM   1107  HN  LEU A  73      94.650  88.730  23.660  1.00  0.00            
ATOM   1108  CA  LEU A  73      95.940  88.970  25.300  1.00  0.00            
ATOM   1109  HA  LEU A  73      95.820  89.050  26.370  1.00  0.00            
ATOM   1110  CB  LEU A  73      97.020  87.870  25.040  1.00  0.00            
ATOM   1111  HB1 LEU A  73      97.360  87.940  23.980  1.00  0.00            
ATOM   1112  HB2 LEU A  73      97.900  88.090  25.680  1.00  0.00            
ATOM   1113  CG  LEU A  73      96.600  86.400  25.300  1.00  0.00            
ATOM   1114  HG  LEU A  73      95.790  86.140  24.570  1.00  0.00            
ATOM   1115  CD1 LEU A  73      97.790  85.460  25.070  1.00  0.00            
ATOM   1116 1HD1 LEU A  73      97.490  84.410  25.250  1.00  0.00            
ATOM   1117 2HD1 LEU A  73      98.180  85.560  24.030  1.00  0.00            
ATOM   1118 3HD1 LEU A  73      98.610  85.710  25.780  1.00  0.00            
ATOM   1119  CD2 LEU A  73      96.090  86.160  26.710  1.00  0.00            
ATOM   1120 1HD2 LEU A  73      95.820  85.100  26.870  1.00  0.00            
ATOM   1121 2HD2 LEU A  73      96.890  86.420  27.420  1.00  0.00            
ATOM   1122 3HD2 LEU A  73      95.200  86.780  26.950  1.00  0.00            
ATOM   1123  C   LEU A  73      96.550  90.300  24.860  1.00  0.00            
ATOM   1124  O   LEU A  73      96.340  90.720  23.730  1.00  0.00            
ATOM   1125  N   SER A  74      97.290  90.970  25.780  1.00  0.00            
ATOM   1126  HN  SER A  74      97.270  90.660  26.740  1.00  0.00            
ATOM   1127  CA  SER A  74      98.130  92.150  25.550  1.00  0.00            
ATOM   1128  HA  SER A  74      98.360  92.470  26.550  1.00  0.00            
ATOM   1129  CB  SER A  74      99.540  91.900  24.940  1.00  0.00            
ATOM   1130  HB1 SER A  74     100.050  92.880  24.770  1.00  0.00            
ATOM   1131  HB2 SER A  74     100.130  91.330  25.690  1.00  0.00            
ATOM   1132  OG  SER A  74      99.530  91.130  23.740  1.00  0.00            
ATOM   1133  HG1 SER A  74     100.400  91.200  23.340  1.00  0.00            
ATOM   1134  C   SER A  74      97.430  93.360  24.980  1.00  0.00            
ATOM   1135  O   SER A  74      97.540  93.720  23.810  1.00  0.00            
ATOM   1136  N   LYS A  75      96.620  94.040  25.830  1.00  0.00            
ATOM   1137  HN  LYS A  75      96.670  93.860  26.810  1.00  0.00            
ATOM   1138  CA  LYS A  75      95.530  94.850  25.320  1.00  0.00            
ATOM   1139  HA  LYS A  75      95.710  95.080  24.280  1.00  0.00            
ATOM   1140  CB  LYS A  75      94.260  93.990  25.420  1.00  0.00            
ATOM   1141  HB1 LYS A  75      94.490  93.020  24.920  1.00  0.00            
ATOM   1142  HB2 LYS A  75      94.040  93.760  26.490  1.00  0.00            
ATOM   1143  CG  LYS A  75      93.040  94.620  24.740  1.00  0.00            
ATOM   1144  HG1 LYS A  75      92.580  95.400  25.380  1.00  0.00            
ATOM   1145  HG2 LYS A  75      93.400  95.130  23.800  1.00  0.00            
ATOM   1146  CD  LYS A  75      92.050  93.530  24.350  1.00  0.00            
ATOM   1147  HD1 LYS A  75      92.640  92.740  23.820  1.00  0.00            
ATOM   1148  HD2 LYS A  75      91.640  93.060  25.260  1.00  0.00            
ATOM   1149  CE  LYS A  75      90.940  94.020  23.430  1.00  0.00            
ATOM   1150  HE1 LYS A  75      90.220  94.660  23.970  1.00  0.00            
ATOM   1151  HE2 LYS A  75      91.360  94.580  22.560  1.00  0.00            
ATOM   1152  NZ  LYS A  75      90.250  92.820  22.920  1.00  0.00            
ATOM   1153  HZ1 LYS A  75      89.480  93.030  22.270  1.00  0.00            
ATOM   1154  HZ2 LYS A  75      90.950  92.180  22.470  1.00  0.00            
ATOM   1155  HZ3 LYS A  75      89.940  92.210  23.720  1.00  0.00            
ATOM   1156  C   LYS A  75      95.280  96.170  26.020  1.00  0.00            
ATOM   1157  O   LYS A  75      95.170  96.270  27.240  1.00  0.00            
ATOM   1158  N   VAL A  76      95.120  97.240  25.230  1.00  0.00            
ATOM   1159  HN  VAL A  76      95.240  97.160  24.240  1.00  0.00            
ATOM   1160  CA  VAL A  76      94.870  98.580  25.720  1.00  0.00            
ATOM   1161  HA  VAL A  76      94.490  98.540  26.730  1.00  0.00            
ATOM   1162  CB  VAL A  76      96.150  99.440  25.730  1.00  0.00            
ATOM   1163  HB  VAL A  76      96.520  99.550  24.680  1.00  0.00            
ATOM   1164  CG1 VAL A  76      95.930 100.840  26.330  1.00  0.00            
ATOM   1165 1HG1 VAL A  76      96.870 101.430  26.250  1.00  0.00            
ATOM   1166 2HG1 VAL A  76      95.130 101.400  25.810  1.00  0.00            
ATOM   1167 3HG1 VAL A  76      95.680 100.770  27.410  1.00  0.00            
ATOM   1168  CG2 VAL A  76      97.260  98.740  26.560  1.00  0.00            
ATOM   1169 1HG2 VAL A  76      98.150  99.390  26.650  1.00  0.00            
ATOM   1170 2HG2 VAL A  76      96.890  98.510  27.580  1.00  0.00            
ATOM   1171 3HG2 VAL A  76      97.580  97.790  26.090  1.00  0.00            
ATOM   1172  C   VAL A  76      93.780  99.220  24.840  1.00  0.00            
ATOM   1173  O   VAL A  76      94.050 100.140  24.080  1.00  0.00            
ATOM   1174  N   THR A  77      92.510  98.710  24.900  1.00  0.00            
ATOM   1175  HN  THR A  77      92.350  97.890  25.450  1.00  0.00            
ATOM   1176  CA  THR A  77      91.260  99.470  24.620  1.00  0.00            
ATOM   1177  HA  THR A  77      91.310 100.350  25.250  1.00  0.00            
ATOM   1178  CB  THR A  77      90.950  99.980  23.230  1.00  0.00            
ATOM   1179  HB  THR A  77      89.850 100.020  23.020  1.00  0.00            
ATOM   1180  OG1 THR A  77      91.540  99.170  22.240  1.00  0.00            
ATOM   1181  HG1 THR A  77      92.290  99.680  21.920  1.00  0.00            
ATOM   1182  CG2 THR A  77      91.430 101.440  23.110  1.00  0.00            
ATOM   1183 1HG2 THR A  77      91.250 101.820  22.090  1.00  0.00            
ATOM   1184 2HG2 THR A  77      90.890 102.090  23.830  1.00  0.00            
ATOM   1185 3HG2 THR A  77      92.510 101.550  23.330  1.00  0.00            
ATOM   1186  C   THR A  77      89.980  98.770  25.110  1.00  0.00            
ATOM   1187  O   THR A  77      89.950  97.560  25.350  1.00  0.00            
ATOM   1188  N   SER A  78      88.910  99.590  25.280  1.00  0.00            
ATOM   1189  HN  SER A  78      89.020 100.560  25.130  1.00  0.00            
ATOM   1190  CA  SER A  78      87.510  99.240  25.470  1.00  0.00            
ATOM   1191  HA  SER A  78      87.380  99.080  26.530  1.00  0.00            
ATOM   1192  CB  SER A  78      86.550 100.410  25.110  1.00  0.00            
ATOM   1193  HB1 SER A  78      85.500 100.070  25.040  1.00  0.00            
ATOM   1194  HB2 SER A  78      86.600 101.170  25.920  1.00  0.00            
ATOM   1195  OG  SER A  78      86.960 101.060  23.900  1.00  0.00            
ATOM   1196  HG1 SER A  78      86.220 101.600  23.580  1.00  0.00            
ATOM   1197  C   SER A  78      87.020  97.970  24.790  1.00  0.00            
ATOM   1198  O   SER A  78      87.170  97.750  23.590  1.00  0.00            
ATOM   1199  N   LYS A  79      86.380  97.090  25.580  1.00  0.00            
ATOM   1200  HN  LYS A  79      86.340  97.250  26.560  1.00  0.00            
ATOM   1201  CA  LYS A  79      85.820  95.860  25.070  1.00  0.00            
ATOM   1202  HA  LYS A  79      85.790  95.860  23.990  1.00  0.00            
ATOM   1203  CB  LYS A  79      86.640  94.650  25.580  1.00  0.00            
ATOM   1204  HB1 LYS A  79      87.690  94.800  25.230  1.00  0.00            
ATOM   1205  HB2 LYS A  79      86.650  94.680  26.690  1.00  0.00            
ATOM   1206  CG  LYS A  79      86.140  93.270  25.100  1.00  0.00            
ATOM   1207  HG1 LYS A  79      85.070  93.130  25.380  1.00  0.00            
ATOM   1208  HG2 LYS A  79      86.200  93.230  23.990  1.00  0.00            
ATOM   1209  CD  LYS A  79      86.960  92.130  25.720  1.00  0.00            
ATOM   1210  HD1 LYS A  79      88.020  92.350  25.470  1.00  0.00            
ATOM   1211  HD2 LYS A  79      86.850  92.170  26.820  1.00  0.00            
ATOM   1212  CE  LYS A  79      86.590  90.730  25.200  1.00  0.00            
ATOM   1213  HE1 LYS A  79      85.590  90.430  25.560  1.00  0.00            
ATOM   1214  HE2 LYS A  79      86.600  90.720  24.080  1.00  0.00            
ATOM   1215  NZ  LYS A  79      87.600  89.740  25.660  1.00  0.00            
ATOM   1216  HZ1 LYS A  79      87.440  88.810  25.230  1.00  0.00            
ATOM   1217  HZ2 LYS A  79      88.550  90.100  25.350  1.00  0.00            
ATOM   1218  HZ3 LYS A  79      87.620  89.660  26.690  1.00  0.00            
ATOM   1219  C   LYS A  79      84.400  95.710  25.570  1.00  0.00            
ATOM   1220  O   LYS A  79      84.150  95.810  26.770  1.00  0.00            
ATOM   1221  N   CYS A  80      83.440  95.440  24.670  1.00  0.00            
ATOM   1222  HN  CYS A  80      83.640  95.410  23.690  1.00  0.00            
ATOM   1223  CA  CYS A  80      82.120  94.990  25.040  1.00  0.00            
ATOM   1224  HA  CYS A  80      82.060  94.850  26.110  1.00  0.00            
ATOM   1225  CB  CYS A  80      81.000  95.980  24.600  1.00  0.00            
ATOM   1226  HB1 CYS A  80      81.340  97.000  24.890  1.00  0.00            
ATOM   1227  HB2 CYS A  80      80.910  95.960  23.490  1.00  0.00            
ATOM   1228  SG  CYS A  80      79.390  95.640  25.400  1.00  0.00            
ATOM   1229  HG1 CYS A  80      78.710  96.590  24.770  1.00  0.00            
ATOM   1230  C   CYS A  80      81.910  93.630  24.400  1.00  0.00            
ATOM   1231  O   CYS A  80      82.450  93.350  23.330  1.00  0.00            
ATOM   1232  N   GLY A  81      81.150  92.740  25.050  1.00  0.00            
ATOM   1233  HN  GLY A  81      80.770  92.960  25.950  1.00  0.00            
ATOM   1234  CA  GLY A  81      80.730  91.480  24.460  1.00  0.00            
ATOM   1235  HA1 GLY A  81      80.610  91.590  23.390  1.00  0.00            
ATOM   1236  HA2 GLY A  81      81.450  90.720  24.740  1.00  0.00            
ATOM   1237  C   GLY A  81      79.410  91.080  25.050  1.00  0.00            
ATOM   1238  O   GLY A  81      79.320  90.880  26.250  1.00  0.00            
ATOM   1239  N   SER A  82      78.360  90.970  24.220  1.00  0.00            
ATOM   1240  HN  SER A  82      78.420  91.140  23.240  1.00  0.00            
ATOM   1241  CA  SER A  82      77.010  90.710  24.670  1.00  0.00            
ATOM   1242  HA  SER A  82      77.000  90.560  25.740  1.00  0.00            
ATOM   1243  CB  SER A  82      76.040  91.890  24.370  1.00  0.00            
ATOM   1244  HB1 SER A  82      74.990  91.590  24.600  1.00  0.00            
ATOM   1245  HB2 SER A  82      76.320  92.720  25.060  1.00  0.00            
ATOM   1246  OG  SER A  82      76.160  92.360  23.030  1.00  0.00            
ATOM   1247  HG1 SER A  82      75.410  92.950  22.870  1.00  0.00            
ATOM   1248  C   SER A  82      76.480  89.430  24.040  1.00  0.00            
ATOM   1249  O   SER A  82      76.420  89.290  22.830  1.00  0.00            
ATOM   1250  N   LEU A  83      76.120  88.430  24.870  1.00  0.00            
ATOM   1251  HN  LEU A  83      76.160  88.570  25.870  1.00  0.00            
ATOM   1252  CA  LEU A  83      75.690  87.130  24.390  1.00  0.00            
ATOM   1253  HA  LEU A  83      75.640  87.130  23.310  1.00  0.00            
ATOM   1254  CB  LEU A  83      76.610  85.950  24.830  1.00  0.00            
ATOM   1255  HB1 LEU A  83      76.460  85.770  25.920  1.00  0.00            
ATOM   1256  HB2 LEU A  83      76.280  85.030  24.300  1.00  0.00            
ATOM   1257  CG  LEU A  83      78.130  86.130  24.600  1.00  0.00            
ATOM   1258  HG  LEU A  83      78.490  86.920  25.310  1.00  0.00            
ATOM   1259  CD1 LEU A  83      78.850  84.810  24.920  1.00  0.00            
ATOM   1260 1HD1 LEU A  83      79.950  84.950  24.920  1.00  0.00            
ATOM   1261 2HD1 LEU A  83      78.540  84.420  25.920  1.00  0.00            
ATOM   1262 3HD1 LEU A  83      78.590  84.040  24.170  1.00  0.00            
ATOM   1263  CD2 LEU A  83      78.530  86.560  23.190  1.00  0.00            
ATOM   1264 1HD2 LEU A  83      79.640  86.650  23.130  1.00  0.00            
ATOM   1265 2HD2 LEU A  83      78.190  85.820  22.440  1.00  0.00            
ATOM   1266 3HD2 LEU A  83      78.110  87.550  22.930  1.00  0.00            
ATOM   1267  C   LEU A  83      74.290  86.820  24.900  1.00  0.00            
ATOM   1268  O   LEU A  83      74.030  86.860  26.100  1.00  0.00            
ATOM   1269  N   GLY A  84      73.340  86.480  24.000  1.00  0.00            
ATOM   1270  HN  GLY A  84      73.550  86.460  23.030  1.00  0.00            
ATOM   1271  CA  GLY A  84      71.980  86.110  24.390  1.00  0.00            
ATOM   1272  HA1 GLY A  84      71.900  86.040  25.460  1.00  0.00            
ATOM   1273  HA2 GLY A  84      71.320  86.860  23.960  1.00  0.00            
ATOM   1274  C   GLY A  84      71.570  84.780  23.800  1.00  0.00            
ATOM   1275  O   GLY A  84      71.580  84.600  22.590  1.00  0.00            
ATOM   1276  N   ASN A  85      71.180  83.810  24.650  1.00  0.00            
ATOM   1277  HN  ASN A  85      71.200  83.980  25.640  1.00  0.00            
ATOM   1278  CA  ASN A  85      70.740  82.500  24.200  1.00  0.00            
ATOM   1279  HA  ASN A  85      70.660  82.490  23.120  1.00  0.00            
ATOM   1280  CB  ASN A  85      71.710  81.370  24.640  1.00  0.00            
ATOM   1281  HB1 ASN A  85      71.680  81.260  25.750  1.00  0.00            
ATOM   1282  HB2 ASN A  85      71.410  80.390  24.200  1.00  0.00            
ATOM   1283  CG  ASN A  85      73.160  81.650  24.250  1.00  0.00            
ATOM   1284  OD1 ASN A  85      74.060  81.630  25.090  1.00  0.00            
ATOM   1285  ND2 ASN A  85      73.420  81.930  22.960  1.00  0.00            
ATOM   1286 1HD2 ASN A  85      72.680  82.050  22.310  1.00  0.00            
ATOM   1287 2HD2 ASN A  85      74.370  82.110  22.730  1.00  0.00            
ATOM   1288  C   ASN A  85      69.360  82.190  24.750  1.00  0.00            
ATOM   1289  O   ASN A  85      69.150  82.250  25.960  1.00  0.00            
ATOM   1290  N   ILE A  86      68.390  81.860  23.870  1.00  0.00            
ATOM   1291  HN  ILE A  86      68.560  81.810  22.890  1.00  0.00            
ATOM   1292  CA  ILE A  86      67.000  81.590  24.240  1.00  0.00            
ATOM   1293  HA  ILE A  86      66.910  81.500  25.310  1.00  0.00            
ATOM   1294  CB  ILE A  86      66.050  82.700  23.770  1.00  0.00            
ATOM   1295  HB  ILE A  86      66.070  82.750  22.650  1.00  0.00            
ATOM   1296  CG2 ILE A  86      64.610  82.360  24.210  1.00  0.00            
ATOM   1297 1HG2 ILE A  86      63.890  83.140  23.870  1.00  0.00            
ATOM   1298 2HG2 ILE A  86      64.250  81.400  23.790  1.00  0.00            
ATOM   1299 3HG2 ILE A  86      64.530  82.310  25.320  1.00  0.00            
ATOM   1300  CG1 ILE A  86      66.490  84.080  24.320  1.00  0.00            
ATOM   1301 1HG1 ILE A  86      66.430  84.050  25.430  1.00  0.00            
ATOM   1302 2HG1 ILE A  86      67.540  84.280  24.040  1.00  0.00            
ATOM   1303  CD  ILE A  86      65.640  85.250  23.810  1.00  0.00            
ATOM   1304  HD1 ILE A  86      66.020  86.220  24.200  1.00  0.00            
ATOM   1305  HD2 ILE A  86      65.650  85.290  22.700  1.00  0.00            
ATOM   1306  HD3 ILE A  86      64.580  85.150  24.130  1.00  0.00            
ATOM   1307  C   ILE A  86      66.610  80.240  23.630  1.00  0.00            
ATOM   1308  O   ILE A  86      66.770  80.040  22.430  1.00  0.00            
ATOM   1309  N   HSD A  87      66.110  79.270  24.430  1.00  0.00            
ATOM   1310  HN  HSD A  87      66.010  79.470  25.410  1.00  0.00            
ATOM   1311  CA  HSD A  87      65.730  77.940  23.960  1.00  0.00            
ATOM   1312  HA  HSD A  87      65.710  77.910  22.880  1.00  0.00            
ATOM   1313  CB  HSD A  87      66.680  76.840  24.520  1.00  0.00            
ATOM   1314  HB1 HSD A  87      66.770  76.990  25.620  1.00  0.00            
ATOM   1315  HB2 HSD A  87      66.240  75.840  24.340  1.00  0.00            
ATOM   1316  ND1 HSD A  87      69.020  75.940  24.440  1.00  0.00            
ATOM   1317  HD1 HSD A  87      69.000  75.490  25.340  1.00  0.00            
ATOM   1318  CG  HSD A  87      68.060  76.780  23.930  1.00  0.00            
ATOM   1319  CE1 HSD A  87      70.110  76.040  23.640  1.00  0.00            
ATOM   1320  HE1 HSD A  87      71.030  75.470  23.800  1.00  0.00            
ATOM   1321  NE2 HSD A  87      69.920  76.890  22.660  1.00  0.00            
ATOM   1322  CD2 HSD A  87      68.630  77.360  22.840  1.00  0.00            
ATOM   1323  HD2 HSD A  87      68.220  78.080  22.140  1.00  0.00            
ATOM   1324  C   HSD A  87      64.350  77.540  24.460  1.00  0.00            
ATOM   1325  O   HSD A  87      64.160  77.360  25.660  1.00  0.00            
ATOM   1326  N   HSD A  88      63.360  77.320  23.560  1.00  0.00            
ATOM   1327  HN  HSD A  88      63.510  77.440  22.580  1.00  0.00            
ATOM   1328  CA  HSD A  88      61.980  77.000  23.930  1.00  0.00            
ATOM   1329  HA  HSD A  88      61.900  76.910  25.010  1.00  0.00            
ATOM   1330  CB  HSD A  88      60.990  78.120  23.480  1.00  0.00            
ATOM   1331  HB1 HSD A  88      61.070  78.250  22.380  1.00  0.00            
ATOM   1332  HB2 HSD A  88      59.940  77.820  23.720  1.00  0.00            
ATOM   1333  ND1 HSD A  88      60.660  80.650  23.780  1.00  0.00            
ATOM   1334  HD1 HSD A  88      59.990  80.870  23.060  1.00  0.00            
ATOM   1335  CG  HSD A  88      61.240  79.450  24.140  1.00  0.00            
ATOM   1336  CE1 HSD A  88      61.100  81.600  24.650  1.00  0.00            
ATOM   1337  HE1 HSD A  88      60.780  82.640  24.610  1.00  0.00            
ATOM   1338  NE2 HSD A  88      61.930  81.080  25.540  1.00  0.00            
ATOM   1339  CD2 HSD A  88      62.010  79.740  25.230  1.00  0.00            
ATOM   1340  HD2 HSD A  88      62.600  79.120  25.880  1.00  0.00            
ATOM   1341  C   HSD A  88      61.480  75.660  23.370  1.00  0.00            
ATOM   1342  O   HSD A  88      61.800  75.280  22.240  1.00  0.00            
ATOM   1343  N   LYS A  89      60.670  74.900  24.160  1.00  0.00            
ATOM   1344  HN  LYS A  89      60.560  75.190  25.110  1.00  0.00            
ATOM   1345  CA  LYS A  89      59.790  73.840  23.660  1.00  0.00            
ATOM   1346  HA  LYS A  89      60.070  73.620  22.640  1.00  0.00            
ATOM   1347  CB  LYS A  89      60.020  72.540  24.500  1.00  0.00            
ATOM   1348  HB1 LYS A  89      61.080  72.580  24.840  1.00  0.00            
ATOM   1349  HB2 LYS A  89      59.400  72.560  25.410  1.00  0.00            
ATOM   1350  CG  LYS A  89      59.860  71.230  23.700  1.00  0.00            
ATOM   1351  HG1 LYS A  89      58.830  71.170  23.290  1.00  0.00            
ATOM   1352  HG2 LYS A  89      60.550  71.270  22.830  1.00  0.00            
ATOM   1353  CD  LYS A  89      60.160  69.960  24.530  1.00  0.00            
ATOM   1354  HD1 LYS A  89      61.250  69.950  24.750  1.00  0.00            
ATOM   1355  HD2 LYS A  89      59.600  70.040  25.480  1.00  0.00            
ATOM   1356  CE  LYS A  89      59.750  68.670  23.780  1.00  0.00            
ATOM   1357  HE1 LYS A  89      58.670  68.720  23.530  1.00  0.00            
ATOM   1358  HE2 LYS A  89      60.340  68.560  22.850  1.00  0.00            
ATOM   1359  NZ  LYS A  89      59.970  67.470  24.620  1.00  0.00            
ATOM   1360  HZ1 LYS A  89      59.670  66.620  24.080  1.00  0.00            
ATOM   1361  HZ2 LYS A  89      60.970  67.380  24.850  1.00  0.00            
ATOM   1362  HZ3 LYS A  89      59.380  67.530  25.470  1.00  0.00            
ATOM   1363  C   LYS A  89      58.370  74.470  23.580  1.00  0.00            
ATOM   1364  O   LYS A  89      58.390  75.590  23.070  1.00  0.00            
ATOM   1365  N   PRO A  90      57.120  74.140  23.950  1.00  0.00            
ATOM   1366  CD  PRO A  90      56.580  75.190  24.830  1.00  0.00            
ATOM   1367  HD1 PRO A  90      55.850  75.830  24.300  1.00  0.00            
ATOM   1368  HD2 PRO A  90      57.370  75.850  25.290  1.00  0.00            
ATOM   1369  CA  PRO A  90      56.570  72.830  24.340  1.00  0.00            
ATOM   1370  HA  PRO A  90      57.130  72.020  23.920  1.00  0.00            
ATOM   1371  CB  PRO A  90      56.510  72.990  25.840  1.00  0.00            
ATOM   1372  HB1 PRO A  90      55.880  72.220  26.330  1.00  0.00            
ATOM   1373  HB2 PRO A  90      57.530  72.960  26.270  1.00  0.00            
ATOM   1374  CG  PRO A  90      55.940  74.420  25.970  1.00  0.00            
ATOM   1375  HG1 PRO A  90      54.830  74.410  25.850  1.00  0.00            
ATOM   1376  HG2 PRO A  90      56.140  74.940  26.920  1.00  0.00            
ATOM   1377  C   PRO A  90      55.100  72.590  23.900  1.00  0.00            
ATOM   1378  O   PRO A  90      54.620  71.470  24.070  1.00  0.00            
ATOM   1379  N   GLY A  91      54.360  73.630  23.460  1.00  0.00            
ATOM   1380  HN  GLY A  91      54.820  74.510  23.360  1.00  0.00            
ATOM   1381  CA  GLY A  91      52.910  73.700  23.300  1.00  0.00            
ATOM   1382  HA1 GLY A  91      52.640  73.210  22.380  1.00  0.00            
ATOM   1383  HA2 GLY A  91      52.420  73.310  24.190  1.00  0.00            
ATOM   1384  C   GLY A  91      52.590  75.170  23.190  1.00  0.00            
ATOM   1385  O   GLY A  91      53.360  75.910  22.580  1.00  0.00            
ATOM   1386  N   GLY A  92      51.490  75.670  23.780  1.00  0.00            
ATOM   1387  HN  GLY A  92      50.850  75.100  24.290  1.00  0.00            
ATOM   1388  CA  GLY A  92      51.240  77.110  23.840  1.00  0.00            
ATOM   1389  HA1 GLY A  92      52.140  77.600  24.180  1.00  0.00            
ATOM   1390  HA2 GLY A  92      50.900  77.430  22.870  1.00  0.00            
ATOM   1391  C   GLY A  92      50.160  77.370  24.860  1.00  0.00            
ATOM   1392  O   GLY A  92      49.760  76.450  25.570  1.00  0.00            
ATOM   1393  N   GLY A  93      49.600  78.590  24.980  1.00  0.00            
ATOM   1394  HN  GLY A  93      48.890  78.640  25.680  1.00  0.00            
ATOM   1395  CA  GLY A  93      49.910  79.830  24.270  1.00  0.00            
ATOM   1396  HA1 GLY A  93      50.180  79.600  23.250  1.00  0.00            
ATOM   1397  HA2 GLY A  93      49.040  80.460  24.330  1.00  0.00            
ATOM   1398  C   GLY A  93      51.040  80.630  24.870  1.00  0.00            
ATOM   1399  O   GLY A  93      51.420  80.420  26.020  1.00  0.00            
ATOM   1400  N   GLN A  94      51.600  81.580  24.090  1.00  0.00            
ATOM   1401  HN  GLN A  94      51.250  81.810  23.180  1.00  0.00            
ATOM   1402  CA  GLN A  94      52.860  82.220  24.420  1.00  0.00            
ATOM   1403  HA  GLN A  94      52.990  82.260  25.490  1.00  0.00            
ATOM   1404  CB  GLN A  94      53.960  81.360  23.750  1.00  0.00            
ATOM   1405  HB1 GLN A  94      53.720  80.310  24.010  1.00  0.00            
ATOM   1406  HB2 GLN A  94      53.870  81.450  22.640  1.00  0.00            
ATOM   1407  CG  GLN A  94      55.430  81.610  24.150  1.00  0.00            
ATOM   1408  HG1 GLN A  94      55.860  82.510  23.670  1.00  0.00            
ATOM   1409  HG2 GLN A  94      55.520  81.730  25.250  1.00  0.00            
ATOM   1410  CD  GLN A  94      56.240  80.370  23.750  1.00  0.00            
ATOM   1411  OE1 GLN A  94      56.660  79.550  24.560  1.00  0.00            
ATOM   1412  NE2 GLN A  94      56.370  80.150  22.420  1.00  0.00            
ATOM   1413 1HE2 GLN A  94      56.090  80.850  21.780  1.00  0.00            
ATOM   1414 2HE2 GLN A  94      56.910  79.350  22.170  1.00  0.00            
ATOM   1415  C   GLN A  94      52.890  83.650  23.890  1.00  0.00            
ATOM   1416  O   GLN A  94      52.590  83.880  22.720  1.00  0.00            
ATOM   1417  N   VAL A  95      53.260  84.640  24.740  1.00  0.00            
ATOM   1418  HN  VAL A  95      53.380  84.450  25.720  1.00  0.00            
ATOM   1419  CA  VAL A  95      53.590  86.000  24.320  1.00  0.00            
ATOM   1420  HA  VAL A  95      53.680  86.050  23.250  1.00  0.00            
ATOM   1421  CB  VAL A  95      52.590  87.050  24.810  1.00  0.00            
ATOM   1422  HB  VAL A  95      52.540  87.030  25.920  1.00  0.00            
ATOM   1423  CG1 VAL A  95      53.020  88.470  24.370  1.00  0.00            
ATOM   1424 1HG1 VAL A  95      52.260  89.220  24.690  1.00  0.00            
ATOM   1425 2HG1 VAL A  95      53.990  88.770  24.820  1.00  0.00            
ATOM   1426 3HG1 VAL A  95      53.110  88.530  23.260  1.00  0.00            
ATOM   1427  CG2 VAL A  95      51.180  86.750  24.260  1.00  0.00            
ATOM   1428 1HG2 VAL A  95      50.470  87.540  24.590  1.00  0.00            
ATOM   1429 2HG2 VAL A  95      51.200  86.740  23.150  1.00  0.00            
ATOM   1430 3HG2 VAL A  95      50.810  85.770  24.620  1.00  0.00            
ATOM   1431  C   VAL A  95      54.940  86.320  24.940  1.00  0.00            
ATOM   1432  O   VAL A  95      55.080  86.260  26.150  1.00  0.00            
ATOM   1433  N   GLU A  96      55.960  86.650  24.130  1.00  0.00            
ATOM   1434  HN  GLU A  96      55.880  86.680  23.140  1.00  0.00            
ATOM   1435  CA  GLU A  96      57.270  86.980  24.640  1.00  0.00            
ATOM   1436  HA  GLU A  96      57.220  87.120  25.710  1.00  0.00            
ATOM   1437  CB  GLU A  96      58.290  85.840  24.400  1.00  0.00            
ATOM   1438  HB1 GLU A  96      59.280  86.110  24.840  1.00  0.00            
ATOM   1439  HB2 GLU A  96      57.930  84.950  24.970  1.00  0.00            
ATOM   1440  CG  GLU A  96      58.500  85.400  22.930  1.00  0.00            
ATOM   1441  HG1 GLU A  96      57.540  85.140  22.460  1.00  0.00            
ATOM   1442  HG2 GLU A  96      58.980  86.210  22.350  1.00  0.00            
ATOM   1443  CD  GLU A  96      59.400  84.170  22.840  1.00  0.00            
ATOM   1444  OE1 GLU A  96      58.850  83.050  22.640  1.00  0.00            
ATOM   1445  OE2 GLU A  96      60.650  84.340  22.900  1.00  0.00            
ATOM   1446  C   GLU A  96      57.760  88.310  24.090  1.00  0.00            
ATOM   1447  O   GLU A  96      57.690  88.590  22.890  1.00  0.00            
ATOM   1448  N   VAL A  97      58.220  89.200  24.990  1.00  0.00            
ATOM   1449  HN  VAL A  97      58.200  88.970  25.970  1.00  0.00            
ATOM   1450  CA  VAL A  97      58.670  90.540  24.670  1.00  0.00            
ATOM   1451  HA  VAL A  97      58.740  90.650  23.590  1.00  0.00            
ATOM   1452  CB  VAL A  97      57.730  91.620  25.210  1.00  0.00            
ATOM   1453  HB  VAL A  97      57.710  91.570  26.330  1.00  0.00            
ATOM   1454  CG1 VAL A  97      58.210  93.020  24.780  1.00  0.00            
ATOM   1455 1HG1 VAL A  97      57.480  93.790  25.140  1.00  0.00            
ATOM   1456 2HG1 VAL A  97      59.200  93.280  25.200  1.00  0.00            
ATOM   1457 3HG1 VAL A  97      58.250  93.100  23.670  1.00  0.00            
ATOM   1458  CG2 VAL A  97      56.300  91.380  24.700  1.00  0.00            
ATOM   1459 1HG2 VAL A  97      55.630  92.200  25.050  1.00  0.00            
ATOM   1460 2HG2 VAL A  97      56.280  91.370  23.590  1.00  0.00            
ATOM   1461 3HG2 VAL A  97      55.890  90.420  25.080  1.00  0.00            
ATOM   1462  C   VAL A  97      60.050  90.750  25.260  1.00  0.00            
ATOM   1463  O   VAL A  97      60.260  90.690  26.470  1.00  0.00            
ATOM   1464  N   LYS A  98      61.060  91.040  24.410  1.00  0.00            
ATOM   1465  HN  LYS A  98      60.920  91.050  23.430  1.00  0.00            
ATOM   1466  CA  LYS A  98      62.390  91.370  24.890  1.00  0.00            
ATOM   1467  HA  LYS A  98      62.380  91.460  25.970  1.00  0.00            
ATOM   1468  CB  LYS A  98      63.430  90.290  24.510  1.00  0.00            
ATOM   1469  HB1 LYS A  98      63.040  89.290  24.810  1.00  0.00            
ATOM   1470  HB2 LYS A  98      63.570  90.280  23.410  1.00  0.00            
ATOM   1471  CG  LYS A  98      64.780  90.530  25.220  1.00  0.00            
ATOM   1472  HG1 LYS A  98      65.060  91.610  25.100  1.00  0.00            
ATOM   1473  HG2 LYS A  98      64.650  90.340  26.310  1.00  0.00            
ATOM   1474  CD  LYS A  98      65.960  89.720  24.680  1.00  0.00            
ATOM   1475  HD1 LYS A  98      65.770  88.630  24.770  1.00  0.00            
ATOM   1476  HD2 LYS A  98      66.090  89.980  23.600  1.00  0.00            
ATOM   1477  CE  LYS A  98      67.210  90.130  25.470  1.00  0.00            
ATOM   1478  HE1 LYS A  98      67.140  91.220  25.670  1.00  0.00            
ATOM   1479  HE2 LYS A  98      67.260  89.590  26.440  1.00  0.00            
ATOM   1480  NZ  LYS A  98      68.470  89.930  24.750  1.00  0.00            
ATOM   1481  HZ1 LYS A  98      69.250  90.400  25.270  1.00  0.00            
ATOM   1482  HZ2 LYS A  98      68.700  88.970  24.490  1.00  0.00            
ATOM   1483  HZ3 LYS A  98      68.420  90.540  23.870  1.00  0.00            
ATOM   1484  C   LYS A  98      62.820  92.720  24.340  1.00  0.00            
ATOM   1485  O   LYS A  98      62.820  92.940  23.130  1.00  0.00            
ATOM   1486  N   SER A  99      63.210  93.660  25.220  1.00  0.00            
ATOM   1487  HN  SER A  99      63.140  93.510  26.210  1.00  0.00            
ATOM   1488  CA  SER A  99      63.780  94.940  24.800  1.00  0.00            
ATOM   1489  HA  SER A  99      63.940  94.920  23.740  1.00  0.00            
ATOM   1490  CB  SER A  99      62.850  96.160  25.090  1.00  0.00            
ATOM   1491  HB1 SER A  99      63.280  97.070  24.620  1.00  0.00            
ATOM   1492  HB2 SER A  99      61.860  95.950  24.610  1.00  0.00            
ATOM   1493  OG  SER A  99      62.630  96.420  26.480  1.00  0.00            
ATOM   1494  HG1 SER A  99      61.790  96.880  26.560  1.00  0.00            
ATOM   1495  C   SER A  99      65.150  95.150  25.430  1.00  0.00            
ATOM   1496  O   SER A  99      65.340  95.040  26.640  1.00  0.00            
ATOM   1497  N   GLU A 100      66.170  95.450  24.600  1.00  0.00            
ATOM   1498  HN  GLU A 100      66.070  95.470  23.610  1.00  0.00            
ATOM   1499  CA  GLU A 100      67.510  95.710  25.090  1.00  0.00            
ATOM   1500  HA  GLU A 100      67.480  95.860  26.160  1.00  0.00            
ATOM   1501  CB  GLU A 100      68.450  94.490  24.870  1.00  0.00            
ATOM   1502  HB1 GLU A 100      69.450  94.690  25.320  1.00  0.00            
ATOM   1503  HB2 GLU A 100      68.000  93.660  25.460  1.00  0.00            
ATOM   1504  CG  GLU A 100      68.640  93.980  23.420  1.00  0.00            
ATOM   1505  HG1 GLU A 100      67.700  94.060  22.840  1.00  0.00            
ATOM   1506  HG2 GLU A 100      69.430  94.560  22.900  1.00  0.00            
ATOM   1507  CD  GLU A 100      69.040  92.510  23.410  1.00  0.00            
ATOM   1508  OE1 GLU A 100      68.290  91.690  22.800  1.00  0.00            
ATOM   1509  OE2 GLU A 100      70.020  92.110  24.080  1.00  0.00            
ATOM   1510  C   GLU A 100      68.030  97.020  24.520  1.00  0.00            
ATOM   1511  O   GLU A 100      68.040  97.250  23.320  1.00  0.00            
ATOM   1512  N   LYS A 101      68.430  97.960  25.410  1.00  0.00            
ATOM   1513  HN  LYS A 101      68.380  97.750  26.400  1.00  0.00            
ATOM   1514  CA  LYS A 101      68.920  99.270  25.040  1.00  0.00            
ATOM   1515  HA  LYS A 101      69.060  99.320  23.970  1.00  0.00            
ATOM   1516  CB  LYS A 101      67.950 100.420  25.480  1.00  0.00            
ATOM   1517  HB1 LYS A 101      66.930 100.180  25.130  1.00  0.00            
ATOM   1518  HB2 LYS A 101      67.930 100.450  26.590  1.00  0.00            
ATOM   1519  CG  LYS A 101      68.400 101.780  24.900  1.00  0.00            
ATOM   1520  HG1 LYS A 101      69.510 101.840  25.000  1.00  0.00            
ATOM   1521  HG2 LYS A 101      68.170 101.800  23.810  1.00  0.00            
ATOM   1522  CD  LYS A 101      67.860 103.050  25.590  1.00  0.00            
ATOM   1523  HD1 LYS A 101      66.780 103.170  25.400  1.00  0.00            
ATOM   1524  HD2 LYS A 101      68.030 102.950  26.680  1.00  0.00            
ATOM   1525  CE  LYS A 101      68.660 104.250  25.030  1.00  0.00            
ATOM   1526  HE1 LYS A 101      69.710 103.920  24.900  1.00  0.00            
ATOM   1527  HE2 LYS A 101      68.270 104.570  24.040  1.00  0.00            
ATOM   1528  NZ  LYS A 101      68.720 105.430  25.920  1.00  0.00            
ATOM   1529  HZ1 LYS A 101      69.590 105.940  25.560  1.00  0.00            
ATOM   1530  HZ2 LYS A 101      67.910 106.070  25.890  1.00  0.00            
ATOM   1531  HZ3 LYS A 101      69.030 105.190  26.870  1.00  0.00            
ATOM   1532  C   LYS A 101      70.260  99.540  25.700  1.00  0.00            
ATOM   1533  O   LYS A 101      70.350  99.640  26.920  1.00  0.00            
ATOM   1534  N   LEU A 102      71.340  99.720  24.910  1.00  0.00            
ATOM   1535  HN  LEU A 102      71.290  99.660  23.920  1.00  0.00            
ATOM   1536  CA  LEU A 102      72.640 100.050  25.460  1.00  0.00            
ATOM   1537  HA  LEU A 102      72.590 100.140  26.530  1.00  0.00            
ATOM   1538  CB  LEU A 102      73.720  99.000  25.100  1.00  0.00            
ATOM   1539  HB1 LEU A 102      74.010  99.110  24.040  1.00  0.00            
ATOM   1540  HB2 LEU A 102      74.630  99.220  25.720  1.00  0.00            
ATOM   1541  CG  LEU A 102      73.330  97.520  25.320  1.00  0.00            
ATOM   1542  HG  LEU A 102      72.520  97.260  24.600  1.00  0.00            
ATOM   1543  CD1 LEU A 102      74.530  96.600  25.070  1.00  0.00            
ATOM   1544 1HD1 LEU A 102      74.240  95.540  25.220  1.00  0.00            
ATOM   1545 2HD1 LEU A 102      74.910  96.730  24.030  1.00  0.00            
ATOM   1546 3HD1 LEU A 102      75.350  96.840  25.780  1.00  0.00            
ATOM   1547  CD2 LEU A 102      72.820  97.230  26.730  1.00  0.00            
ATOM   1548 1HD2 LEU A 102      72.580  96.150  26.860  1.00  0.00            
ATOM   1549 2HD2 LEU A 102      73.610  97.500  27.460  1.00  0.00            
ATOM   1550 3HD2 LEU A 102      71.900  97.800  26.980  1.00  0.00            
ATOM   1551  C   LEU A 102      73.070 101.410  24.920  1.00  0.00            
ATOM   1552  O   LEU A 102      73.000 101.640  23.720  1.00  0.00            
ATOM   1553  N   ASP A 103      73.500 102.320  25.820  1.00  0.00            
ATOM   1554  HN  ASP A 103      73.500 102.120  26.800  1.00  0.00            
ATOM   1555  CA  ASP A 103      73.980 103.650  25.490  1.00  0.00            
ATOM   1556  HA  ASP A 103      74.020 103.770  24.420  1.00  0.00            
ATOM   1557  CB  ASP A 103      73.060 104.720  26.150  1.00  0.00            
ATOM   1558  HB1 ASP A 103      72.320 104.240  26.820  1.00  0.00            
ATOM   1559  HB2 ASP A 103      73.640 105.440  26.770  1.00  0.00            
ATOM   1560  CG  ASP A 103      72.330 105.550  25.110  1.00  0.00            
ATOM   1561  OD1 ASP A 103      71.130 105.870  25.340  1.00  0.00            
ATOM   1562  OD2 ASP A 103      72.920 105.820  24.040  1.00  0.00            
ATOM   1563  C   ASP A 103      75.410 103.810  26.000  1.00  0.00            
ATOM   1564  O   ASP A 103      75.770 103.310  27.060  1.00  0.00            
ATOM   1565  N   PHE A 104      76.280 104.490  25.230  1.00  0.00            
ATOM   1566  HN  PHE A 104      75.970 104.920  24.380  1.00  0.00            
ATOM   1567  CA  PHE A 104      77.640 104.750  25.670  1.00  0.00            
ATOM   1568  HA  PHE A 104      77.610 104.930  26.730  1.00  0.00            
ATOM   1569  CB  PHE A 104      78.570 103.520  25.370  1.00  0.00            
ATOM   1570  HB1 PHE A 104      78.120 102.630  25.860  1.00  0.00            
ATOM   1571  HB2 PHE A 104      78.580 103.350  24.270  1.00  0.00            
ATOM   1572  CG  PHE A 104      80.010 103.590  25.860  1.00  0.00            
ATOM   1573  CD1 PHE A 104      80.960 102.750  25.240  1.00  0.00            
ATOM   1574  HD1 PHE A 104      80.640 102.110  24.440  1.00  0.00            
ATOM   1575  CE1 PHE A 104      82.290 102.730  25.660  1.00  0.00            
ATOM   1576  HE1 PHE A 104      82.990 102.060  25.180  1.00  0.00            
ATOM   1577  CZ  PHE A 104      82.710 103.560  26.710  1.00  0.00            
ATOM   1578  HZ  PHE A 104      83.730 103.530  27.050  1.00  0.00            
ATOM   1579  CD2 PHE A 104      80.450 104.400  26.920  1.00  0.00            
ATOM   1580  HD2 PHE A 104      79.750 105.020  27.450  1.00  0.00            
ATOM   1581  CE2 PHE A 104      81.790 104.400  27.340  1.00  0.00            
ATOM   1582  HE2 PHE A 104      82.080 105.020  28.170  1.00  0.00            
ATOM   1583  C   PHE A 104      78.200 106.020  25.020  1.00  0.00            
ATOM   1584  O   PHE A 104      78.280 106.130  23.800  1.00  0.00            
ATOM   1585  N   LYS A 105      78.670 106.970  25.850  1.00  0.00            
ATOM   1586  HN  LYS A 105      78.510 106.850  26.840  1.00  0.00            
ATOM   1587  CA  LYS A 105      79.290 108.210  25.440  1.00  0.00            
ATOM   1588  HA  LYS A 105      79.500 108.720  26.360  1.00  0.00            
ATOM   1589  CB  LYS A 105      80.680 108.050  24.750  1.00  0.00            
ATOM   1590  HB1 LYS A 105      81.270 107.290  25.310  1.00  0.00            
ATOM   1591  HB2 LYS A 105      80.510 107.660  23.730  1.00  0.00            
ATOM   1592  CG  LYS A 105      81.470 109.380  24.680  1.00  0.00            
ATOM   1593  HG1 LYS A 105      80.760 110.170  24.330  1.00  0.00            
ATOM   1594  HG2 LYS A 105      81.760 109.690  25.700  1.00  0.00            
ATOM   1595  CD  LYS A 105      82.630 109.380  23.680  1.00  0.00            
ATOM   1596  HD1 LYS A 105      83.520 108.880  24.130  1.00  0.00            
ATOM   1597  HD2 LYS A 105      82.300 108.760  22.810  1.00  0.00            
ATOM   1598  CE  LYS A 105      82.930 110.790  23.160  1.00  0.00            
ATOM   1599  HE1 LYS A 105      82.010 111.230  22.710  1.00  0.00            
ATOM   1600  HE2 LYS A 105      83.270 111.450  23.990  1.00  0.00            
ATOM   1601  NZ  LYS A 105      83.980 110.760  22.110  1.00  0.00            
ATOM   1602  HZ1 LYS A 105      84.160 111.730  21.760  1.00  0.00            
ATOM   1603  HZ2 LYS A 105      84.860 110.340  22.470  1.00  0.00            
ATOM   1604  HZ3 LYS A 105      83.630 110.190  21.310  1.00  0.00            
ATOM   1605  C   LYS A 105      78.390 109.190  24.670  1.00  0.00            
ATOM   1606  O   LYS A 105      78.680 109.570  23.530  1.00  0.00            
ATOM   1607  N   ASP A 106      77.330 109.670  25.330  1.00  0.00            
ATOM   1608  HN  ASP A 106      77.070 109.340  26.230  1.00  0.00            
ATOM   1609  CA  ASP A 106      76.570 110.810  24.850  1.00  0.00            
ATOM   1610  HA  ASP A 106      76.570 110.780  23.770  1.00  0.00            
ATOM   1611  CB  ASP A 106      75.080 110.700  25.310  1.00  0.00            
ATOM   1612  HB1 ASP A 106      74.740 109.650  25.200  1.00  0.00            
ATOM   1613  HB2 ASP A 106      74.970 110.980  26.380  1.00  0.00            
ATOM   1614  CG  ASP A 106      74.090 111.540  24.490  1.00  0.00            
ATOM   1615  OD1 ASP A 106      72.870 111.500  24.780  1.00  0.00            
ATOM   1616  OD2 ASP A 106      74.550 112.260  23.560  1.00  0.00            
ATOM   1617  C   ASP A 106      77.240 112.130  25.270  1.00  0.00            
ATOM   1618  O   ASP A 106      78.290 112.180  25.940  1.00  0.00            
ATOM   1619  N   ARG A 107      76.630 113.230  24.820  1.00  0.00            
ATOM   1620  HN  ARG A 107      75.830 113.020  24.220  1.00  0.00            
ATOM   1621  CA  ARG A 107      76.760 114.580  25.280  1.00  0.00            
ATOM   1622  HA  ARG A 107      76.390 114.570  26.300  1.00  0.00            
ATOM   1623  CB  ARG A 107      78.190 115.200  25.240  1.00  0.00            
ATOM   1624  HB1 ARG A 107      78.870 114.520  25.800  1.00  0.00            
ATOM   1625  HB2 ARG A 107      78.530 115.210  24.180  1.00  0.00            
ATOM   1626  CG  ARG A 107      78.270 116.610  25.850  1.00  0.00            
ATOM   1627  HG1 ARG A 107      77.420 117.220  25.460  1.00  0.00            
ATOM   1628  HG2 ARG A 107      78.130 116.510  26.950  1.00  0.00            
ATOM   1629  CD  ARG A 107      79.570 117.370  25.570  1.00  0.00            
ATOM   1630  HD1 ARG A 107      80.440 116.810  25.990  1.00  0.00            
ATOM   1631  HD2 ARG A 107      79.690 117.520  24.470  1.00  0.00            
ATOM   1632  NE  ARG A 107      79.420 118.690  26.270  1.00  0.00            
ATOM   1633  HE  ARG A 107      78.510 118.910  26.610  1.00  0.00            
ATOM   1634  CZ  ARG A 107      80.340 119.670  26.250  1.00  0.00            
ATOM   1635  NH1 ARG A 107      81.530 119.490  25.690  1.00  0.00            
ATOM   1636 1HH1 ARG A 107      81.670 118.660  25.160  1.00  0.00            
ATOM   1637 2HH1 ARG A 107      82.150 120.260  25.580  1.00  0.00            
ATOM   1638  NH2 ARG A 107      80.060 120.850  26.800  1.00  0.00            
ATOM   1639 1HH2 ARG A 107      79.120 121.030  27.070  1.00  0.00            
ATOM   1640 2HH2 ARG A 107      80.680 121.610  26.640  1.00  0.00            
ATOM   1641  C   ARG A 107      75.830 115.460  24.450  1.00  0.00            
ATOM   1642  O   ARG A 107      76.210 115.900  23.370  1.00  0.00            
ATOM   1643  N   VAL A 108      74.620 115.750  25.000  1.00  0.00            
ATOM   1644  HN  VAL A 108      74.360 115.160  25.770  1.00  0.00            
ATOM   1645  CA  VAL A 108      73.660 116.820  24.700  1.00  0.00            
ATOM   1646  HA  VAL A 108      73.840 117.520  25.490  1.00  0.00            
ATOM   1647  CB  VAL A 108      73.850 117.760  23.490  1.00  0.00            
ATOM   1648  HB  VAL A 108      74.000 117.150  22.570  1.00  0.00            
ATOM   1649  CG1 VAL A 108      72.660 118.730  23.300  1.00  0.00            
ATOM   1650 1HG1 VAL A 108      72.890 119.440  22.470  1.00  0.00            
ATOM   1651 2HG1 VAL A 108      71.720 118.210  23.040  1.00  0.00            
ATOM   1652 3HG1 VAL A 108      72.510 119.330  24.220  1.00  0.00            
ATOM   1653  CG2 VAL A 108      75.070 118.690  23.730  1.00  0.00            
ATOM   1654 1HG2 VAL A 108      75.220 119.340  22.840  1.00  0.00            
ATOM   1655 2HG2 VAL A 108      74.890 119.330  24.620  1.00  0.00            
ATOM   1656 3HG2 VAL A 108      76.000 118.120  23.890  1.00  0.00            
ATOM   1657  C   VAL A 108      72.230 116.380  25.020  1.00  0.00            
ATOM   1658  O   VAL A 108      71.850 116.460  26.180  1.00  0.00            
ATOM   1659  N   GLN A 109      71.360 115.970  24.070  1.00  0.00            
ATOM   1660  HN  GLN A 109      71.660 115.770  23.140  1.00  0.00            
ATOM   1661  CA  GLN A 109      69.950 115.770  24.400  1.00  0.00            
ATOM   1662  HA  GLN A 109      69.800 115.760  25.470  1.00  0.00            
ATOM   1663  CB  GLN A 109      69.080 116.920  23.800  1.00  0.00            
ATOM   1664  HB1 GLN A 109      69.480 117.880  24.190  1.00  0.00            
ATOM   1665  HB2 GLN A 109      69.230 116.910  22.690  1.00  0.00            
ATOM   1666  CG  GLN A 109      67.560 116.830  24.110  1.00  0.00            
ATOM   1667  HG1 GLN A 109      67.180 115.820  23.860  1.00  0.00            
ATOM   1668  HG2 GLN A 109      67.390 117.000  25.190  1.00  0.00            
ATOM   1669  CD  GLN A 109      66.680 117.820  23.330  1.00  0.00            
ATOM   1670  OE1 GLN A 109      65.470 117.650  23.240  1.00  0.00            
ATOM   1671  NE2 GLN A 109      67.290 118.880  22.750  1.00  0.00            
ATOM   1672 1HE2 GLN A 109      68.280 118.970  22.810  1.00  0.00            
ATOM   1673 2HE2 GLN A 109      66.730 119.500  22.220  1.00  0.00            
ATOM   1674  C   GLN A 109      69.440 114.440  23.890  1.00  0.00            
ATOM   1675  O   GLN A 109      69.240 114.260  22.690  1.00  0.00            
ATOM   1676  N   SER A 110      69.140 113.510  24.800  1.00  0.00            
ATOM   1677  HN  SER A 110      69.320 113.660  25.780  1.00  0.00            
ATOM   1678  CA  SER A 110      68.610 112.200  24.450  1.00  0.00            
ATOM   1679  HA  SER A 110      68.620 112.110  23.370  1.00  0.00            
ATOM   1680  CB  SER A 110      69.490 111.010  24.950  1.00  0.00            
ATOM   1681  HB1 SER A 110      69.340 110.140  24.280  1.00  0.00            
ATOM   1682  HB2 SER A 110      70.550 111.320  24.850  1.00  0.00            
ATOM   1683  OG  SER A 110      69.260 110.600  26.300  1.00  0.00            
ATOM   1684  HG1 SER A 110      70.150 110.430  26.650  1.00  0.00            
ATOM   1685  C   SER A 110      67.160 112.110  24.890  1.00  0.00            
ATOM   1686  O   SER A 110      66.780 112.340  26.040  1.00  0.00            
ATOM   1687  N   LYS A 111      66.240 111.820  23.950  1.00  0.00            
ATOM   1688  HN  LYS A 111      66.520 111.690  23.000  1.00  0.00            
ATOM   1689  CA  LYS A 111      64.840 111.680  24.260  1.00  0.00            
ATOM   1690  HA  LYS A 111      64.680 111.680  25.330  1.00  0.00            
ATOM   1691  CB  LYS A 111      64.000 112.840  23.640  1.00  0.00            
ATOM   1692  HB1 LYS A 111      64.350 113.790  24.100  1.00  0.00            
ATOM   1693  HB2 LYS A 111      64.240 112.890  22.560  1.00  0.00            
ATOM   1694  CG  LYS A 111      62.480 112.700  23.820  1.00  0.00            
ATOM   1695  HG1 LYS A 111      62.160 111.720  23.380  1.00  0.00            
ATOM   1696  HG2 LYS A 111      62.240 112.660  24.910  1.00  0.00            
ATOM   1697  CD  LYS A 111      61.700 113.820  23.110  1.00  0.00            
ATOM   1698  HD1 LYS A 111      61.930 114.780  23.610  1.00  0.00            
ATOM   1699  HD2 LYS A 111      62.110 113.880  22.070  1.00  0.00            
ATOM   1700  CE  LYS A 111      60.200 113.550  23.040  1.00  0.00            
ATOM   1701  HE1 LYS A 111      60.010 112.570  22.530  1.00  0.00            
ATOM   1702  HE2 LYS A 111      59.760 113.500  24.060  1.00  0.00            
ATOM   1703  NZ  LYS A 111      59.510 114.610  22.270  1.00  0.00            
ATOM   1704  HZ1 LYS A 111      58.490 114.430  22.220  1.00  0.00            
ATOM   1705  HZ2 LYS A 111      59.690 115.550  22.680  1.00  0.00            
ATOM   1706  HZ3 LYS A 111      59.890 114.620  21.290  1.00  0.00            
ATOM   1707  C   LYS A 111      64.330 110.350  23.750  1.00  0.00            
ATOM   1708  O   LYS A 111      64.240 110.100  22.550  1.00  0.00            
ATOM   1709  N   ILE A 112      63.920 109.460  24.680  1.00  0.00            
ATOM   1710  HN  ILE A 112      64.040 109.670  25.660  1.00  0.00            
ATOM   1711  CA  ILE A 112      63.340 108.170  24.380  1.00  0.00            
ATOM   1712  HA  ILE A 112      63.340 108.030  23.300  1.00  0.00            
ATOM   1713  CB  ILE A 112      64.100 106.960  24.980  1.00  0.00            
ATOM   1714  HB  ILE A 112      64.500 106.390  24.110  1.00  0.00            
ATOM   1715  CG2 ILE A 112      65.340 107.430  25.780  1.00  0.00            
ATOM   1716 1HG2 ILE A 112      65.930 106.570  26.130  1.00  0.00            
ATOM   1717 2HG2 ILE A 112      66.010 108.060  25.160  1.00  0.00            
ATOM   1718 3HG2 ILE A 112      65.030 108.010  26.670  1.00  0.00            
ATOM   1719  CG1 ILE A 112      63.220 105.960  25.790  1.00  0.00            
ATOM   1720 1HG1 ILE A 112      62.770 106.480  26.660  1.00  0.00            
ATOM   1721 2HG1 ILE A 112      62.380 105.610  25.140  1.00  0.00            
ATOM   1722  CD  ILE A 112      63.970 104.710  26.290  1.00  0.00            
ATOM   1723  HD1 ILE A 112      63.250 104.020  26.790  1.00  0.00            
ATOM   1724  HD2 ILE A 112      64.440 104.170  25.440  1.00  0.00            
ATOM   1725  HD3 ILE A 112      64.750 104.980  27.030  1.00  0.00            
ATOM   1726  C   ILE A 112      61.870 108.220  24.780  1.00  0.00            
ATOM   1727  O   ILE A 112      61.510 108.660  25.870  1.00  0.00            
ATOM   1728  N   GLY A 113      60.990 107.770  23.880  1.00  0.00            
ATOM   1729  HN  GLY A 113      61.280 107.510  22.960  1.00  0.00            
ATOM   1730  CA  GLY A 113      59.600 107.460  24.180  1.00  0.00            
ATOM   1731  HA1 GLY A 113      59.450 107.380  25.250  1.00  0.00            
ATOM   1732  HA2 GLY A 113      58.980 108.220  23.720  1.00  0.00            
ATOM   1733  C   GLY A 113      59.260 106.150  23.540  1.00  0.00            
ATOM   1734  O   GLY A 113      59.350 106.030  22.320  1.00  0.00            
ATOM   1735  N   SER A 114      58.870 105.130  24.320  1.00  0.00            
ATOM   1736  HN  SER A 114      58.880 105.210  25.320  1.00  0.00            
ATOM   1737  CA  SER A 114      58.450 103.830  23.800  1.00  0.00            
ATOM   1738  HA  SER A 114      58.390 103.870  22.720  1.00  0.00            
ATOM   1739  CB  SER A 114      59.390 102.650  24.190  1.00  0.00            
ATOM   1740  HB1 SER A 114      58.880 101.680  24.020  1.00  0.00            
ATOM   1741  HB2 SER A 114      60.280 102.690  23.520  1.00  0.00            
ATOM   1742  OG  SER A 114      59.850 102.730  25.540  1.00  0.00            
ATOM   1743  HG1 SER A 114      60.180 101.860  25.770  1.00  0.00            
ATOM   1744  C   SER A 114      57.050 103.520  24.300  1.00  0.00            
ATOM   1745  O   SER A 114      56.800 103.560  25.500  1.00  0.00            
ATOM   1746  N   LEU A 115      56.100 103.240  23.390  1.00  0.00            
ATOM   1747  HN  LEU A 115      56.300 103.170  22.410  1.00  0.00            
ATOM   1748  CA  LEU A 115      54.710 103.000  23.730  1.00  0.00            
ATOM   1749  HA  LEU A 115      54.580 103.000  24.810  1.00  0.00            
ATOM   1750  CB  LEU A 115      53.730 104.030  23.090  1.00  0.00            
ATOM   1751  HB1 LEU A 115      53.620 103.810  22.000  1.00  0.00            
ATOM   1752  HB2 LEU A 115      52.720 103.860  23.550  1.00  0.00            
ATOM   1753  CG  LEU A 115      54.060 105.530  23.220  1.00  0.00            
ATOM   1754  HG  LEU A 115      54.880 105.780  22.510  1.00  0.00            
ATOM   1755  CD1 LEU A 115      52.820 106.370  22.870  1.00  0.00            
ATOM   1756 1HD1 LEU A 115      53.040 107.460  22.970  1.00  0.00            
ATOM   1757 2HD1 LEU A 115      52.480 106.160  21.840  1.00  0.00            
ATOM   1758 3HD1 LEU A 115      51.990 106.130  23.570  1.00  0.00            
ATOM   1759  CD2 LEU A 115      54.500 105.940  24.620  1.00  0.00            
ATOM   1760 1HD2 LEU A 115      54.560 107.040  24.730  1.00  0.00            
ATOM   1761 2HD2 LEU A 115      53.760 105.550  25.340  1.00  0.00            
ATOM   1762 3HD2 LEU A 115      55.490 105.520  24.890  1.00  0.00            
ATOM   1763  C   LEU A 115      54.290 101.620  23.240  1.00  0.00            
ATOM   1764  O   LEU A 115      54.400 101.350  22.040  1.00  0.00            
ATOM   1765  N   ASP A 116      53.780 100.750  24.130  1.00  0.00            
ATOM   1766  HN  ASP A 116      53.780 100.950  25.110  1.00  0.00            
ATOM   1767  CA  ASP A 116      53.300  99.420  23.790  1.00  0.00            
ATOM   1768  HA  ASP A 116      53.420  99.250  22.730  1.00  0.00            
ATOM   1769  CB  ASP A 116      54.100  98.350  24.580  1.00  0.00            
ATOM   1770  HB1 ASP A 116      55.160  98.680  24.680  1.00  0.00            
ATOM   1771  HB2 ASP A 116      53.700  98.200  25.600  1.00  0.00            
ATOM   1772  CG  ASP A 116      54.100  97.040  23.830  1.00  0.00            
ATOM   1773  OD1 ASP A 116      55.200  96.510  23.540  1.00  0.00            
ATOM   1774  OD2 ASP A 116      52.980  96.600  23.430  1.00  0.00            
ATOM   1775  C   ASP A 116      51.800  99.330  24.120  1.00  0.00            
ATOM   1776  O   ASP A 116      51.340  99.800  25.160  1.00  0.00            
ATOM   1777  N   ASN A 117      50.980  98.780  23.200  1.00  0.00            
ATOM   1778  HN  ASN A 117      51.390  98.290  22.440  1.00  0.00            
ATOM   1779  CA  ASN A 117      49.550  98.610  23.410  1.00  0.00            
ATOM   1780  HA  ASN A 117      49.330  98.630  24.470  1.00  0.00            
ATOM   1781  CB  ASN A 117      48.680  99.660  22.640  1.00  0.00            
ATOM   1782  HB1 ASN A 117      48.920  99.620  21.560  1.00  0.00            
ATOM   1783  HB2 ASN A 117      47.600  99.420  22.760  1.00  0.00            
ATOM   1784  CG  ASN A 117      48.840 101.120  23.070  1.00  0.00            
ATOM   1785  OD1 ASN A 117      48.560 102.030  22.280  1.00  0.00            
ATOM   1786  ND2 ASN A 117      49.200 101.390  24.330  1.00  0.00            
ATOM   1787 1HD2 ASN A 117      49.680 100.680  24.870  1.00  0.00            
ATOM   1788 2HD2 ASN A 117      49.160 102.320  24.670  1.00  0.00            
ATOM   1789  C   ASN A 117      49.090  97.240  22.900  1.00  0.00            
ATOM   1790  O   ASN A 117      49.030  97.000  21.700  1.00  0.00            
ATOM   1791  N   ILE A 118      48.700  96.330  23.810  1.00  0.00            
ATOM   1792  HN  ILE A 118      48.800  96.530  24.800  1.00  0.00            
ATOM   1793  CA  ILE A 118      48.270  94.980  23.470  1.00  0.00            
ATOM   1794  HA  ILE A 118      48.400  94.810  22.410  1.00  0.00            
ATOM   1795  CB  ILE A 118      49.060  93.920  24.230  1.00  0.00            
ATOM   1796  HB  ILE A 118      48.900  94.060  25.330  1.00  0.00            
ATOM   1797  CG2 ILE A 118      48.580  92.500  23.850  1.00  0.00            
ATOM   1798 1HG2 ILE A 118      49.160  91.730  24.400  1.00  0.00            
ATOM   1799 2HG2 ILE A 118      47.510  92.330  24.110  1.00  0.00            
ATOM   1800 3HG2 ILE A 118      48.720  92.320  22.760  1.00  0.00            
ATOM   1801  CG1 ILE A 118      50.580  94.100  23.980  1.00  0.00            
ATOM   1802 1HG1 ILE A 118      50.790  94.040  22.890  1.00  0.00            
ATOM   1803 2HG1 ILE A 118      50.890  95.120  24.310  1.00  0.00            
ATOM   1804  CD  ILE A 118      51.480  93.100  24.730  1.00  0.00            
ATOM   1805  HD1 ILE A 118      52.550  93.370  24.550  1.00  0.00            
ATOM   1806  HD2 ILE A 118      51.300  93.160  25.820  1.00  0.00            
ATOM   1807  HD3 ILE A 118      51.310  92.070  24.380  1.00  0.00            
ATOM   1808  C   ILE A 118      46.790  94.810  23.810  1.00  0.00            
ATOM   1809  O   ILE A 118      46.380  94.960  24.950  1.00  0.00            
ATOM   1810  N   THR A 119      45.940  94.480  22.810  1.00  0.00            
ATOM   1811  HN  THR A 119      46.270  94.410  21.880  1.00  0.00            
ATOM   1812  CA  THR A 119      44.520  94.190  23.050  1.00  0.00            
ATOM   1813  HA  THR A 119      44.320  94.160  24.110  1.00  0.00            
ATOM   1814  CB  THR A 119      43.570  95.220  22.430  1.00  0.00            
ATOM   1815  HB  THR A 119      43.800  95.320  21.340  1.00  0.00            
ATOM   1816  OG1 THR A 119      43.740  96.480  23.060  1.00  0.00            
ATOM   1817  HG1 THR A 119      43.290  97.130  22.510  1.00  0.00            
ATOM   1818  CG2 THR A 119      42.090  94.860  22.620  1.00  0.00            
ATOM   1819 1HG2 THR A 119      41.440  95.650  22.190  1.00  0.00            
ATOM   1820 2HG2 THR A 119      41.830  93.900  22.120  1.00  0.00            
ATOM   1821 3HG2 THR A 119      41.850  94.760  23.710  1.00  0.00            
ATOM   1822  C   THR A 119      44.160  92.840  22.490  1.00  0.00            
ATOM   1823  O   THR A 119      44.210  92.600  21.280  1.00  0.00            
ATOM   1824  N   HSD A 120      43.730  91.900  23.360  1.00  0.00            
ATOM   1825  HN  HSD A 120      43.770  92.100  24.340  1.00  0.00            
ATOM   1826  CA  HSD A 120      43.090  90.650  22.980  1.00  0.00            
ATOM   1827  HA  HSD A 120      43.180  90.490  21.910  1.00  0.00            
ATOM   1828  CB  HSD A 120      43.660  89.430  23.760  1.00  0.00            
ATOM   1829  HB1 HSD A 120      43.520  89.600  24.840  1.00  0.00            
ATOM   1830  HB2 HSD A 120      43.110  88.510  23.480  1.00  0.00            
ATOM   1831  ND1 HSD A 120      45.850  88.300  24.320  1.00  0.00            
ATOM   1832  HD1 HSD A 120      45.540  87.830  25.150  1.00  0.00            
ATOM   1833  CG  HSD A 120      45.130  89.170  23.540  1.00  0.00            
ATOM   1834  CE1 HSD A 120      47.110  88.270  23.820  1.00  0.00            
ATOM   1835  HE1 HSD A 120      47.910  87.670  24.260  1.00  0.00            
ATOM   1836  NE2 HSD A 120      47.240  89.050  22.770  1.00  0.00            
ATOM   1837  CD2 HSD A 120      45.990  89.620  22.590  1.00  0.00            
ATOM   1838  HD2 HSD A 120      45.840  90.330  21.790  1.00  0.00            
ATOM   1839  C   HSD A 120      41.620  90.720  23.350  1.00  0.00            
ATOM   1840  O   HSD A 120      41.250  91.490  24.230  1.00  0.00            
ATOM   1841  N   VAL A 121      40.740  89.910  22.710  1.00  0.00            
ATOM   1842  HN  VAL A 121      41.030  89.350  21.940  1.00  0.00            
ATOM   1843  CA  VAL A 121      39.390  89.670  23.230  1.00  0.00            
ATOM   1844  HA  VAL A 121      39.210  90.410  23.990  1.00  0.00            
ATOM   1845  CB  VAL A 121      38.260  89.970  22.240  1.00  0.00            
ATOM   1846  HB  VAL A 121      38.180  89.160  21.490  1.00  0.00            
ATOM   1847  CG1 VAL A 121      36.930  90.190  22.990  1.00  0.00            
ATOM   1848 1HG1 VAL A 121      36.100  90.320  22.260  1.00  0.00            
ATOM   1849 2HG1 VAL A 121      36.670  89.340  23.660  1.00  0.00            
ATOM   1850 3HG1 VAL A 121      36.980  91.100  23.610  1.00  0.00            
ATOM   1851  CG2 VAL A 121      38.560  91.300  21.500  1.00  0.00            
ATOM   1852 1HG2 VAL A 121      37.730  91.540  20.810  1.00  0.00            
ATOM   1853 2HG2 VAL A 121      38.650  92.120  22.240  1.00  0.00            
ATOM   1854 3HG2 VAL A 121      39.500  91.240  20.920  1.00  0.00            
ATOM   1855  C   VAL A 121      39.410  88.340  24.020  1.00  0.00            
ATOM   1856  O   VAL A 121      40.280  88.310  24.890  1.00  0.00            
ATOM   1857  N   PRO A 122      38.640  87.230  23.950  1.00  0.00            
ATOM   1858  CD  PRO A 122      37.700  86.850  22.890  1.00  0.00            
ATOM   1859  HD1 PRO A 122      38.300  86.430  22.050  1.00  0.00            
ATOM   1860  HD2 PRO A 122      37.050  87.670  22.540  1.00  0.00            
ATOM   1861  CA  PRO A 122      38.920  86.060  24.770  1.00  0.00            
ATOM   1862  HA  PRO A 122      39.290  86.390  25.720  1.00  0.00            
ATOM   1863  CB  PRO A 122      37.520  85.390  24.800  1.00  0.00            
ATOM   1864  HB1 PRO A 122      37.530  84.310  24.990  1.00  0.00            
ATOM   1865  HB2 PRO A 122      36.910  85.860  25.600  1.00  0.00            
ATOM   1866  CG  PRO A 122      36.830  85.740  23.490  1.00  0.00            
ATOM   1867  HG1 PRO A 122      36.770  84.860  22.810  1.00  0.00            
ATOM   1868  HG2 PRO A 122      35.790  86.100  23.700  1.00  0.00            
ATOM   1869  C   PRO A 122      40.100  85.230  24.290  1.00  0.00            
ATOM   1870  O   PRO A 122      40.670  85.530  23.250  1.00  0.00            
ATOM   1871  N   GLY A 123      40.600  84.240  25.080  1.00  0.00            
ATOM   1872  HN  GLY A 123      41.540  84.000  24.890  1.00  0.00            
ATOM   1873  CA  GLY A 123      39.860  83.270  25.890  1.00  0.00            
ATOM   1874  HA1 GLY A 123      40.570  82.760  26.520  1.00  0.00            
ATOM   1875  HA2 GLY A 123      39.080  83.760  26.460  1.00  0.00            
ATOM   1876  C   GLY A 123      39.250  82.230  24.970  1.00  0.00            
ATOM   1877  O   GLY A 123      39.890  81.780  24.030  1.00  0.00            
ATOM   1878  N   GLY A 124      37.990  81.820  25.200  1.00  0.00            
ATOM   1879  HN  GLY A 124      37.480  82.130  25.990  1.00  0.00            
ATOM   1880  CA  GLY A 124      37.350  80.840  24.320  1.00  0.00            
ATOM   1881  HA1 GLY A 124      36.280  81.010  24.350  1.00  0.00            
ATOM   1882  HA2 GLY A 124      37.760  80.920  23.320  1.00  0.00            
ATOM   1883  C   GLY A 124      37.600  79.450  24.830  1.00  0.00            
ATOM   1884  O   GLY A 124      37.550  79.210  26.030  1.00  0.00            
ATOM   1885  N   GLY A 125      37.830  78.490  23.910  1.00  0.00            
ATOM   1886  HN  GLY A 125      37.860  78.710  22.940  1.00  0.00            
ATOM   1887  CA  GLY A 125      38.180  77.130  24.280  1.00  0.00            
ATOM   1888  HA1 GLY A 125      38.230  77.020  25.360  1.00  0.00            
ATOM   1889  HA2 GLY A 125      37.460  76.470  23.830  1.00  0.00            
ATOM   1890  C   GLY A 125      39.530  76.770  23.720  1.00  0.00            
ATOM   1891  O   GLY A 125      39.710  76.700  22.510  1.00  0.00            
ATOM   1892  N   ASN A 126      40.510  76.480  24.590  1.00  0.00            
ATOM   1893  HN  ASN A 126      40.340  76.570  25.580  1.00  0.00            
ATOM   1894  CA  ASN A 126      41.810  76.000  24.150  1.00  0.00            
ATOM   1895  HA  ASN A 126      41.850  75.920  23.080  1.00  0.00            
ATOM   1896  CB  ASN A 126      43.000  76.870  24.650  1.00  0.00            
ATOM   1897  HB1 ASN A 126      43.050  76.840  25.760  1.00  0.00            
ATOM   1898  HB2 ASN A 126      43.960  76.470  24.250  1.00  0.00            
ATOM   1899  CG  ASN A 126      42.900  78.340  24.250  1.00  0.00            
ATOM   1900  OD1 ASN A 126      43.290  79.200  25.030  1.00  0.00            
ATOM   1901  ND2 ASN A 126      42.410  78.650  23.030  1.00  0.00            
ATOM   1902 1HD2 ASN A 126      41.990  77.950  22.460  1.00  0.00            
ATOM   1903 2HD2 ASN A 126      42.340  79.620  22.810  1.00  0.00            
ATOM   1904  C   ASN A 126      41.990  74.600  24.710  1.00  0.00            
ATOM   1905  O   ASN A 126      41.970  74.380  25.920  1.00  0.00            
ATOM   1906  N   LYS A 127      42.150  73.600  23.830  1.00  0.00            
ATOM   1907  HN  LYS A 127      42.180  73.760  22.850  1.00  0.00            
ATOM   1908  CA  LYS A 127      42.290  72.220  24.250  1.00  0.00            
ATOM   1909  HA  LYS A 127      42.420  72.170  25.320  1.00  0.00            
ATOM   1910  CB  LYS A 127      41.050  71.380  23.870  1.00  0.00            
ATOM   1911  HB1 LYS A 127      40.150  71.900  24.280  1.00  0.00            
ATOM   1912  HB2 LYS A 127      40.950  71.380  22.760  1.00  0.00            
ATOM   1913  CG  LYS A 127      41.100  69.940  24.390  1.00  0.00            
ATOM   1914  HG1 LYS A 127      42.010  69.440  23.970  1.00  0.00            
ATOM   1915  HG2 LYS A 127      41.220  69.970  25.500  1.00  0.00            
ATOM   1916  CD  LYS A 127      39.870  69.110  24.000  1.00  0.00            
ATOM   1917  HD1 LYS A 127      38.970  69.550  24.500  1.00  0.00            
ATOM   1918  HD2 LYS A 127      39.730  69.220  22.900  1.00  0.00            
ATOM   1919  CE  LYS A 127      40.050  67.640  24.350  1.00  0.00            
ATOM   1920  HE1 LYS A 127      40.960  67.250  23.840  1.00  0.00            
ATOM   1921  HE2 LYS A 127      40.160  67.510  25.440  1.00  0.00            
ATOM   1922  NZ  LYS A 127      38.890  66.830  23.880  1.00  0.00            
ATOM   1923  HZ1 LYS A 127      39.040  65.820  24.120  1.00  0.00            
ATOM   1924  HZ2 LYS A 127      38.010  67.170  24.300  1.00  0.00            
ATOM   1925  HZ3 LYS A 127      38.820  66.910  22.850  1.00  0.00            
ATOM   1926  C   LYS A 127      43.530  71.610  23.640  1.00  0.00            
ATOM   1927  O   LYS A 127      43.670  71.550  22.420  1.00  0.00            
ATOM   1928  N   LYS A 128      44.460  71.110  24.480  1.00  0.00            
ATOM   1929  HN  LYS A 128      44.340  71.190  25.480  1.00  0.00            
ATOM   1930  CA  LYS A 128      45.640  70.400  24.030  1.00  0.00            
ATOM   1931  HA  LYS A 128      45.650  70.330  22.950  1.00  0.00            
ATOM   1932  CB  LYS A 128      46.960  71.090  24.490  1.00  0.00            
ATOM   1933  HB1 LYS A 128      46.900  72.180  24.250  1.00  0.00            
ATOM   1934  HB2 LYS A 128      47.050  71.000  25.590  1.00  0.00            
ATOM   1935  CG  LYS A 128      48.180  70.490  23.780  1.00  0.00            
ATOM   1936  HG1 LYS A 128      47.990  69.390  23.710  1.00  0.00            
ATOM   1937  HG2 LYS A 128      48.240  70.850  22.730  1.00  0.00            
ATOM   1938  CD  LYS A 128      49.550  70.590  24.470  1.00  0.00            
ATOM   1939  HD1 LYS A 128      50.000  71.600  24.310  1.00  0.00            
ATOM   1940  HD2 LYS A 128      49.420  70.430  25.560  1.00  0.00            
ATOM   1941  CE  LYS A 128      50.430  69.480  23.880  1.00  0.00            
ATOM   1942  HE1 LYS A 128      49.770  68.600  23.720  1.00  0.00            
ATOM   1943  HE2 LYS A 128      50.830  69.770  22.880  1.00  0.00            
ATOM   1944  NZ  LYS A 128      51.530  68.950  24.710  1.00  0.00            
ATOM   1945  HZ1 LYS A 128      51.880  68.110  24.150  1.00  0.00            
ATOM   1946  HZ2 LYS A 128      52.310  69.610  24.850  1.00  0.00            
ATOM   1947  HZ3 LYS A 128      51.180  68.500  25.590  1.00  0.00            
ATOM   1948  C   LYS A 128      45.610  68.970  24.570  1.00  0.00            
ATOM   1949  O   LYS A 128      45.310  68.750  25.750  1.00  0.00            
ATOM   1950  N   ILE A 129      45.910  67.980  23.710  1.00  0.00            
ATOM   1951  HN  ILE A 129      46.100  68.140  22.750  1.00  0.00            
ATOM   1952  CA  ILE A 129      46.270  66.630  24.120  1.00  0.00            
ATOM   1953  HA  ILE A 129      46.450  66.610  25.180  1.00  0.00            
ATOM   1954  CB  ILE A 129      45.200  65.580  23.800  1.00  0.00            
ATOM   1955  HB  ILE A 129      45.080  65.510  22.690  1.00  0.00            
ATOM   1956  CG2 ILE A 129      45.660  64.200  24.330  1.00  0.00            
ATOM   1957 1HG2 ILE A 129      44.920  63.410  24.090  1.00  0.00            
ATOM   1958 2HG2 ILE A 129      46.620  63.890  23.870  1.00  0.00            
ATOM   1959 3HG2 ILE A 129      45.810  64.230  25.430  1.00  0.00            
ATOM   1960  CG1 ILE A 129      43.820  65.980  24.400  1.00  0.00            
ATOM   1961 1HG1 ILE A 129      43.940  66.050  25.510  1.00  0.00            
ATOM   1962 2HG1 ILE A 129      43.550  66.990  24.020  1.00  0.00            
ATOM   1963  CD  ILE A 129      42.690  65.000  24.060  1.00  0.00            
ATOM   1964  HD1 ILE A 129      41.740  65.320  24.520  1.00  0.00            
ATOM   1965  HD2 ILE A 129      42.580  64.920  22.960  1.00  0.00            
ATOM   1966  HD3 ILE A 129      42.930  63.980  24.450  1.00  0.00            
ATOM   1967  C   ILE A 129      47.570  66.280  23.400  1.00  0.00            
ATOM   1968  O   ILE A 129      47.540  66.320  22.170  1.00  0.00            
ATOM   1969  N   GLU A 130      48.670  65.970  24.130  1.00  0.00            
ATOM   1970  HN  GLU A 130      48.660  66.040  25.130  1.00  0.00            
ATOM   1971  CA  GLU A 130      49.920  65.420  23.600  1.00  0.00            
ATOM   1972  HA  GLU A 130      50.470  65.140  24.490  1.00  0.00            
ATOM   1973  CB  GLU A 130      49.670  64.060  22.860  1.00  0.00            
ATOM   1974  HB1 GLU A 130      48.740  63.640  23.310  1.00  0.00            
ATOM   1975  HB2 GLU A 130      49.450  64.260  21.790  1.00  0.00            
ATOM   1976  CG  GLU A 130      50.770  62.960  23.020  1.00  0.00            
ATOM   1977  HG1 GLU A 130      51.610  63.180  22.330  1.00  0.00            
ATOM   1978  HG2 GLU A 130      51.160  63.000  24.060  1.00  0.00            
ATOM   1979  CD  GLU A 130      50.320  61.520  22.790  1.00  0.00            
ATOM   1980  OE1 GLU A 130      51.220  60.650  22.550  1.00  0.00            
ATOM   1981  OE2 GLU A 130      49.120  61.150  22.900  1.00  0.00            
ATOM   1982  C   GLU A 130      50.860  66.450  22.880  1.00  0.00            
ATOM   1983  OT1 GLU A 130      50.450  67.110  21.890  1.00  0.00            
ATOM   1984  OT2 GLU A 130      51.990  66.710  23.410  1.00  0.00            
ATOM   1985  N   MET B   1      86.140  45.860  28.540  1.00  0.00            
ATOM   1986  H1  MET B   1      86.070  44.900  28.930  1.00  0.00            
ATOM   1987  H2  MET B   1      85.420  46.470  28.980  1.00  0.00            
ATOM   1988  H3  MET B   1      85.940  45.810  27.520  1.00  0.00            
ATOM   1989  CA  MET B   1      87.520  46.410  28.730  1.00  0.00            
ATOM   1990  HA  MET B   1      87.730  46.500  29.780  1.00  0.00            
ATOM   1991  CB  MET B   1      88.530  45.440  28.060  1.00  0.00            
ATOM   1992  HB1 MET B   1      88.280  45.320  26.980  1.00  0.00            
ATOM   1993  HB2 MET B   1      89.560  45.880  28.110  1.00  0.00            
ATOM   1994  CG  MET B   1      88.610  44.050  28.710  1.00  0.00            
ATOM   1995  HG1 MET B   1      89.060  44.140  29.720  1.00  0.00            
ATOM   1996  HG2 MET B   1      87.610  43.580  28.820  1.00  0.00            
ATOM   1997  SD  MET B   1      89.630  42.930  27.710  1.00  0.00            
ATOM   1998  CE  MET B   1      89.670  41.590  28.930  1.00  0.00            
ATOM   1999  HE1 MET B   1      90.230  40.720  28.540  1.00  0.00            
ATOM   2000  HE2 MET B   1      90.180  41.910  29.870  1.00  0.00            
ATOM   2001  HE3 MET B   1      88.650  41.240  29.190  1.00  0.00            
ATOM   2002  C   MET B   1      87.690  47.780  28.100  1.00  0.00            
ATOM   2003  O   MET B   1      87.120  48.020  27.040  1.00  0.00            
ATOM   2004  N   GLN B   2      88.460  48.680  28.750  1.00  0.00            
ATOM   2005  HN  GLN B   2      88.920  48.480  29.610  1.00  0.00            
ATOM   2006  CA  GLN B   2      88.890  49.950  28.200  1.00  0.00            
ATOM   2007  HA  GLN B   2      88.940  49.900  27.120  1.00  0.00            
ATOM   2008  CB  GLN B   2      88.030  51.150  28.680  1.00  0.00            
ATOM   2009  HB1 GLN B   2      88.190  51.290  29.770  1.00  0.00            
ATOM   2010  HB2 GLN B   2      88.400  52.060  28.160  1.00  0.00            
ATOM   2011  CG  GLN B   2      86.510  51.000  28.430  1.00  0.00            
ATOM   2012  HG1 GLN B   2      86.330  50.770  27.360  1.00  0.00            
ATOM   2013  HG2 GLN B   2      86.120  50.160  29.040  1.00  0.00            
ATOM   2014  CD  GLN B   2      85.710  52.250  28.790  1.00  0.00            
ATOM   2015  OE1 GLN B   2      84.540  52.390  28.390  1.00  0.00            
ATOM   2016  NE2 GLN B   2      86.280  53.160  29.610  1.00  0.00            
ATOM   2017 1HE2 GLN B   2      87.230  53.020  29.890  1.00  0.00            
ATOM   2018 2HE2 GLN B   2      85.880  54.060  29.710  1.00  0.00            
ATOM   2019  C   GLN B   2      90.280  50.180  28.750  1.00  0.00            
ATOM   2020  O   GLN B   2      90.460  50.030  29.960  1.00  0.00            
ATOM   2021  N   THR B   3      91.260  50.540  27.900  1.00  0.00            
ATOM   2022  HN  THR B   3      91.100  50.590  26.910  1.00  0.00            
ATOM   2023  CA  THR B   3      92.640  50.740  28.320  1.00  0.00            
ATOM   2024  HA  THR B   3      92.710  50.790  29.400  1.00  0.00            
ATOM   2025  CB  THR B   3      93.560  49.630  27.820  1.00  0.00            
ATOM   2026  HB  THR B   3      93.550  49.610  26.700  1.00  0.00            
ATOM   2027  OG1 THR B   3      93.110  48.370  28.300  1.00  0.00            
ATOM   2028  HG1 THR B   3      93.730  47.730  27.930  1.00  0.00            
ATOM   2029  CG2 THR B   3      94.990  49.810  28.340  1.00  0.00            
ATOM   2030 1HG2 THR B   3      95.640  48.970  27.990  1.00  0.00            
ATOM   2031 2HG2 THR B   3      95.440  50.750  27.970  1.00  0.00            
ATOM   2032 3HG2 THR B   3      95.010  49.810  29.450  1.00  0.00            
ATOM   2033  C   THR B   3      93.130  52.050  27.740  1.00  0.00            
ATOM   2034  O   THR B   3      93.120  52.220  26.520  1.00  0.00            
ATOM   2035  N   ALA B   4      93.550  53.020  28.580  1.00  0.00            
ATOM   2036  HN  ALA B   4      93.520  52.910  29.580  1.00  0.00            
ATOM   2037  CA  ALA B   4      93.950  54.330  28.070  1.00  0.00            
ATOM   2038  HA  ALA B   4      94.330  54.230  27.070  1.00  0.00            
ATOM   2039  CB  ALA B   4      92.720  55.260  28.020  1.00  0.00            
ATOM   2040  HB1 ALA B   4      93.010  56.250  27.600  1.00  0.00            
ATOM   2041  HB2 ALA B   4      91.950  54.820  27.350  1.00  0.00            
ATOM   2042  HB3 ALA B   4      92.290  55.410  29.030  1.00  0.00            
ATOM   2043  C   ALA B   4      95.040  55.000  28.910  1.00  0.00            
ATOM   2044  O   ALA B   4      94.730  55.570  29.950  1.00  0.00            
ATOM   2045  N   PRO B   5      96.320  54.970  28.530  1.00  0.00            
ATOM   2046  CD  PRO B   5      96.860  53.910  27.670  1.00  0.00            
ATOM   2047  HD1 PRO B   5      96.460  54.000  26.640  1.00  0.00            
ATOM   2048  HD2 PRO B   5      96.590  52.920  28.100  1.00  0.00            
ATOM   2049  CA  PRO B   5      97.360  55.640  29.290  1.00  0.00            
ATOM   2050  HA  PRO B   5      97.090  55.730  30.330  1.00  0.00            
ATOM   2051  CB  PRO B   5      98.590  54.730  29.090  1.00  0.00            
ATOM   2052  HB1 PRO B   5      99.560  55.270  29.170  1.00  0.00            
ATOM   2053  HB2 PRO B   5      98.570  53.910  29.830  1.00  0.00            
ATOM   2054  CG  PRO B   5      98.370  54.110  27.710  1.00  0.00            
ATOM   2055  HG1 PRO B   5      98.680  54.870  26.960  1.00  0.00            
ATOM   2056  HG2 PRO B   5      98.940  53.180  27.560  1.00  0.00            
ATOM   2057  C   PRO B   5      97.680  57.040  28.810  1.00  0.00            
ATOM   2058  O   PRO B   5      97.670  57.310  27.610  1.00  0.00            
ATOM   2059  N   VAL B   6      98.010  57.950  29.740  1.00  0.00            
ATOM   2060  HN  VAL B   6      97.920  57.700  30.720  1.00  0.00            
ATOM   2061  CA  VAL B   6      98.660  59.220  29.470  1.00  0.00            
ATOM   2062  HA  VAL B   6      98.440  59.500  28.460  1.00  0.00            
ATOM   2063  CB  VAL B   6      98.150  60.350  30.370  1.00  0.00            
ATOM   2064  HB  VAL B   6      98.450  60.160  31.420  1.00  0.00            
ATOM   2065  CG1 VAL B   6      98.670  61.740  29.940  1.00  0.00            
ATOM   2066 1HG1 VAL B   6      98.200  62.520  30.570  1.00  0.00            
ATOM   2067 2HG1 VAL B   6      99.770  61.820  30.070  1.00  0.00            
ATOM   2068 3HG1 VAL B   6      98.410  61.940  28.880  1.00  0.00            
ATOM   2069  CG2 VAL B   6      96.610  60.360  30.300  1.00  0.00            
ATOM   2070 1HG2 VAL B   6      96.200  61.190  30.910  1.00  0.00            
ATOM   2071 2HG2 VAL B   6      96.270  60.490  29.250  1.00  0.00            
ATOM   2072 3HG2 VAL B   6      96.170  59.420  30.690  1.00  0.00            
ATOM   2073  C   VAL B   6     100.180  58.970  29.560  1.00  0.00            
ATOM   2074  O   VAL B   6     100.600  57.900  30.010  1.00  0.00            
ATOM   2075  N   PRO B   7     100.970  59.840  28.960  1.00  0.00            
ATOM   2076  CD  PRO B   7     101.170  59.300  27.650  1.00  0.00            
ATOM   2077  HD1 PRO B   7     101.150  60.190  27.000  1.00  0.00            
ATOM   2078  HD2 PRO B   7     100.350  58.620  27.290  1.00  0.00            
ATOM   2079  CA  PRO B   7     102.320  60.210  29.410  1.00  0.00            
ATOM   2080  HA  PRO B   7     102.390  60.310  30.470  1.00  0.00            
ATOM   2081  CB  PRO B   7     103.260  59.110  28.870  1.00  0.00            
ATOM   2082  HB1 PRO B   7     104.270  59.490  28.610  1.00  0.00            
ATOM   2083  HB2 PRO B   7     103.380  58.300  29.620  1.00  0.00            
ATOM   2084  CG  PRO B   7     102.510  58.550  27.670  1.00  0.00            
ATOM   2085  HG1 PRO B   7     103.090  58.680  26.750  1.00  0.00            
ATOM   2086  HG2 PRO B   7     102.320  57.460  27.830  1.00  0.00            
ATOM   2087  C   PRO B   7     102.780  61.580  28.930  1.00  0.00            
ATOM   2088  O   PRO B   7     102.750  61.890  27.740  1.00  0.00            
ATOM   2089  N   MET B   8     103.280  62.410  29.860  1.00  0.00            
ATOM   2090  HN  MET B   8     103.230  62.170  30.830  1.00  0.00            
ATOM   2091  CA  MET B   8     104.080  63.570  29.530  1.00  0.00            
ATOM   2092  HA  MET B   8     103.960  63.800  28.480  1.00  0.00            
ATOM   2093  CB  MET B   8     103.640  64.840  30.290  1.00  0.00            
ATOM   2094  HB1 MET B   8     103.580  64.630  31.380  1.00  0.00            
ATOM   2095  HB2 MET B   8     104.390  65.650  30.140  1.00  0.00            
ATOM   2096  CG  MET B   8     102.280  65.340  29.780  1.00  0.00            
ATOM   2097  HG1 MET B   8     102.350  65.470  28.670  1.00  0.00            
ATOM   2098  HG2 MET B   8     101.520  64.540  29.950  1.00  0.00            
ATOM   2099  SD  MET B   8     101.710  66.900  30.510  1.00  0.00            
ATOM   2100  CE  MET B   8     100.180  66.900  29.540  1.00  0.00            
ATOM   2101  HE1 MET B   8      99.540  67.770  29.780  1.00  0.00            
ATOM   2102  HE2 MET B   8     100.390  66.930  28.450  1.00  0.00            
ATOM   2103  HE3 MET B   8      99.580  65.980  29.730  1.00  0.00            
ATOM   2104  C   MET B   8     105.560  63.230  29.710  1.00  0.00            
ATOM   2105  O   MET B   8     105.920  62.150  30.160  1.00  0.00            
ATOM   2106  N   PRO B   9     106.350  64.090  29.090  1.00  0.00            
ATOM   2107  CD  PRO B   9     106.580  63.470  27.800  1.00  0.00            
ATOM   2108  HD1 PRO B   9     106.510  64.310  27.110  1.00  0.00            
ATOM   2109  HD2 PRO B   9     105.820  62.720  27.480  1.00  0.00            
ATOM   2110  CA  PRO B   9     107.690  64.500  29.550  1.00  0.00            
ATOM   2111  HA  PRO B   9     107.730  64.670  30.600  1.00  0.00            
ATOM   2112  CB  PRO B   9     108.650  63.400  29.080  1.00  0.00            
ATOM   2113  HB1 PRO B   9     109.670  63.780  28.850  1.00  0.00            
ATOM   2114  HB2 PRO B   9     108.730  62.600  29.840  1.00  0.00            
ATOM   2115  CG  PRO B   9     107.970  62.800  27.850  1.00  0.00            
ATOM   2116  HG1 PRO B   9     108.560  63.010  26.940  1.00  0.00            
ATOM   2117  HG2 PRO B   9     107.850  61.700  27.980  1.00  0.00            
ATOM   2118  C   PRO B   9     108.100  65.850  28.970  1.00  0.00            
ATOM   2119  O   PRO B   9     107.990  66.080  27.760  1.00  0.00            
ATOM   2120  N   ASP B  10     108.590  66.760  29.820  1.00  0.00            
ATOM   2121  HN  ASP B  10     108.640  66.590  30.810  1.00  0.00            
ATOM   2122  CA  ASP B  10     109.070  68.060  29.390  1.00  0.00            
ATOM   2123  HA  ASP B  10     109.160  68.090  28.310  1.00  0.00            
ATOM   2124  CB  ASP B  10     108.100  69.150  29.900  1.00  0.00            
ATOM   2125  HB1 ASP B  10     107.190  68.630  30.290  1.00  0.00            
ATOM   2126  HB2 ASP B  10     108.530  69.720  30.750  1.00  0.00            
ATOM   2127  CG  ASP B  10     107.670  70.120  28.820  1.00  0.00            
ATOM   2128  OD1 ASP B  10     106.490  70.010  28.350  1.00  0.00            
ATOM   2129  OD2 ASP B  10     108.420  71.070  28.520  1.00  0.00            
ATOM   2130  C   ASP B  10     110.480  68.230  29.960  1.00  0.00            
ATOM   2131  O   ASP B  10     110.680  68.200  31.170  1.00  0.00            
ATOM   2132  N   LEU B  11     111.500  68.360  29.090  1.00  0.00            
ATOM   2133  HN  LEU B  11     111.310  68.370  28.100  1.00  0.00            
ATOM   2134  CA  LEU B  11     112.860  68.570  29.530  1.00  0.00            
ATOM   2135  HA  LEU B  11     112.900  68.630  30.610  1.00  0.00            
ATOM   2136  CB  LEU B  11     113.880  67.480  29.080  1.00  0.00            
ATOM   2137  HB1 LEU B  11     114.050  67.580  27.980  1.00  0.00            
ATOM   2138  HB2 LEU B  11     114.850  67.690  29.580  1.00  0.00            
ATOM   2139  CG  LEU B  11     113.530  65.990  29.350  1.00  0.00            
ATOM   2140  HG  LEU B  11     112.700  65.710  28.660  1.00  0.00            
ATOM   2141  CD1 LEU B  11     114.750  65.090  29.080  1.00  0.00            
ATOM   2142 1HD1 LEU B  11     114.470  64.020  29.230  1.00  0.00            
ATOM   2143 2HD1 LEU B  11     115.130  65.200  28.040  1.00  0.00            
ATOM   2144 3HD1 LEU B  11     115.570  65.330  29.780  1.00  0.00            
ATOM   2145  CD2 LEU B  11     113.070  65.710  30.770  1.00  0.00            
ATOM   2146 1HD2 LEU B  11     112.850  64.630  30.910  1.00  0.00            
ATOM   2147 2HD2 LEU B  11     113.890  65.990  31.450  1.00  0.00            
ATOM   2148 3HD2 LEU B  11     112.160  66.280  31.050  1.00  0.00            
ATOM   2149  C   LEU B  11     113.360  69.900  28.990  1.00  0.00            
ATOM   2150  O   LEU B  11     113.500  70.070  27.780  1.00  0.00            
ATOM   2151  N   LYS B  12     113.680  70.850  29.900  1.00  0.00            
ATOM   2152  HN  LYS B  12     113.390  70.660  30.850  1.00  0.00            
ATOM   2153  CA  LYS B  12     114.540  72.010  29.710  1.00  0.00            
ATOM   2154  HA  LYS B  12     115.250  71.850  30.500  1.00  0.00            
ATOM   2155  CB  LYS B  12     115.490  71.990  28.480  1.00  0.00            
ATOM   2156  HB1 LYS B  12     115.930  70.970  28.400  1.00  0.00            
ATOM   2157  HB2 LYS B  12     114.840  72.100  27.600  1.00  0.00            
ATOM   2158  CG  LYS B  12     116.620  73.020  28.470  1.00  0.00            
ATOM   2159  HG1 LYS B  12     116.210  73.960  28.900  1.00  0.00            
ATOM   2160  HG2 LYS B  12     117.440  72.640  29.130  1.00  0.00            
ATOM   2161  CD  LYS B  12     117.170  73.350  27.080  1.00  0.00            
ATOM   2162  HD1 LYS B  12     117.560  72.420  26.610  1.00  0.00            
ATOM   2163  HD2 LYS B  12     116.300  73.700  26.470  1.00  0.00            
ATOM   2164  CE  LYS B  12     118.230  74.460  27.060  1.00  0.00            
ATOM   2165  HE1 LYS B  12     117.860  75.360  27.590  1.00  0.00            
ATOM   2166  HE2 LYS B  12     119.170  74.100  27.540  1.00  0.00            
ATOM   2167  NZ  LYS B  12     118.550  74.870  25.680  1.00  0.00            
ATOM   2168  HZ1 LYS B  12     119.300  75.590  25.670  1.00  0.00            
ATOM   2169  HZ2 LYS B  12     118.840  74.040  25.120  1.00  0.00            
ATOM   2170  HZ3 LYS B  12     117.680  75.300  25.250  1.00  0.00            
ATOM   2171  C   LYS B  12     113.910  73.370  30.080  1.00  0.00            
ATOM   2172  O   LYS B  12     113.850  73.720  31.260  1.00  0.00            
ATOM   2173  N   ASN B  13     113.520  74.260  29.160  1.00  0.00            
ATOM   2174  HN  ASN B  13     113.460  74.010  28.190  1.00  0.00            
ATOM   2175  CA  ASN B  13     113.150  75.620  29.550  1.00  0.00            
ATOM   2176  HA  ASN B  13     113.130  75.750  30.620  1.00  0.00            
ATOM   2177  CB  ASN B  13     114.110  76.670  28.920  1.00  0.00            
ATOM   2178  HB1 ASN B  13     114.340  76.360  27.890  1.00  0.00            
ATOM   2179  HB2 ASN B  13     113.620  77.670  28.880  1.00  0.00            
ATOM   2180  CG  ASN B  13     115.410  76.810  29.700  1.00  0.00            
ATOM   2181  OD1 ASN B  13     116.460  76.220  29.420  1.00  0.00            
ATOM   2182  ND2 ASN B  13     115.380  77.690  30.740  1.00  0.00            
ATOM   2183 1HD2 ASN B  13     114.530  78.160  30.950  1.00  0.00            
ATOM   2184 2HD2 ASN B  13     116.220  77.870  31.240  1.00  0.00            
ATOM   2185  C   ASN B  13     111.740  75.960  29.110  1.00  0.00            
ATOM   2186  O   ASN B  13     111.480  76.130  27.920  1.00  0.00            
ATOM   2187  N   VAL B  14     110.830  76.130  30.080  1.00  0.00            
ATOM   2188  HN  VAL B  14     111.080  76.010  31.050  1.00  0.00            
ATOM   2189  CA  VAL B  14     109.410  76.330  29.910  1.00  0.00            
ATOM   2190  HA  VAL B  14     109.120  76.180  28.890  1.00  0.00            
ATOM   2191  CB  VAL B  14     108.640  75.360  30.820  1.00  0.00            
ATOM   2192  HB  VAL B  14     108.930  75.560  31.880  1.00  0.00            
ATOM   2193  CG1 VAL B  14     107.120  75.530  30.680  1.00  0.00            
ATOM   2194 1HG1 VAL B  14     106.610  74.790  31.340  1.00  0.00            
ATOM   2195 2HG1 VAL B  14     106.780  76.540  30.980  1.00  0.00            
ATOM   2196 3HG1 VAL B  14     106.820  75.330  29.630  1.00  0.00            
ATOM   2197  CG2 VAL B  14     109.060  73.900  30.530  1.00  0.00            
ATOM   2198 1HG2 VAL B  14     108.510  73.210  31.200  1.00  0.00            
ATOM   2199 2HG2 VAL B  14     108.840  73.620  29.480  1.00  0.00            
ATOM   2200 3HG2 VAL B  14     110.140  73.740  30.720  1.00  0.00            
ATOM   2201  C   VAL B  14     109.040  77.750  30.310  1.00  0.00            
ATOM   2202  O   VAL B  14     109.130  78.130  31.480  1.00  0.00            
ATOM   2203  N   LYS B  15     108.630  78.620  29.360  1.00  0.00            
ATOM   2204  HN  LYS B  15     108.640  78.360  28.390  1.00  0.00            
ATOM   2205  CA  LYS B  15     108.200  79.970  29.720  1.00  0.00            
ATOM   2206  HA  LYS B  15     108.650  80.220  30.670  1.00  0.00            
ATOM   2207  CB  LYS B  15     108.700  81.070  28.750  1.00  0.00            
ATOM   2208  HB1 LYS B  15     109.800  80.960  28.660  1.00  0.00            
ATOM   2209  HB2 LYS B  15     108.250  80.910  27.750  1.00  0.00            
ATOM   2210  CG  LYS B  15     108.350  82.470  29.280  1.00  0.00            
ATOM   2211  HG1 LYS B  15     107.250  82.610  29.170  1.00  0.00            
ATOM   2212  HG2 LYS B  15     108.590  82.500  30.360  1.00  0.00            
ATOM   2213  CD  LYS B  15     109.080  83.610  28.550  1.00  0.00            
ATOM   2214  HD1 LYS B  15     110.180  83.480  28.740  1.00  0.00            
ATOM   2215  HD2 LYS B  15     108.900  83.490  27.460  1.00  0.00            
ATOM   2216  CE  LYS B  15     108.600  84.990  29.020  1.00  0.00            
ATOM   2217  HE1 LYS B  15     107.520  85.120  28.770  1.00  0.00            
ATOM   2218  HE2 LYS B  15     108.720  85.080  30.120  1.00  0.00            
ATOM   2219  NZ  LYS B  15     109.370  86.070  28.370  1.00  0.00            
ATOM   2220  HZ1 LYS B  15     109.040  87.000  28.680  1.00  0.00            
ATOM   2221  HZ2 LYS B  15     110.390  85.970  28.590  1.00  0.00            
ATOM   2222  HZ3 LYS B  15     109.250  85.990  27.350  1.00  0.00            
ATOM   2223  C   LYS B  15     106.710  80.090  29.940  1.00  0.00            
ATOM   2224  O   LYS B  15     106.320  80.490  31.030  1.00  0.00            
ATOM   2225  N   SER B  16     105.840  79.760  28.970  1.00  0.00            
ATOM   2226  HN  SER B  16     106.130  79.590  28.020  1.00  0.00            
ATOM   2227  CA  SER B  16     104.410  79.600  29.210  1.00  0.00            
ATOM   2228  HA  SER B  16     104.270  79.460  30.270  1.00  0.00            
ATOM   2229  CB  SER B  16     103.510  80.820  28.850  1.00  0.00            
ATOM   2230  HB1 SER B  16     102.450  80.570  29.080  1.00  0.00            
ATOM   2231  HB2 SER B  16     103.810  81.670  29.510  1.00  0.00            
ATOM   2232  OG  SER B  16     103.610  81.250  27.490  1.00  0.00            
ATOM   2233  HG1 SER B  16     102.900  81.880  27.340  1.00  0.00            
ATOM   2234  C   SER B  16     103.900  78.330  28.550  1.00  0.00            
ATOM   2235  O   SER B  16     104.040  78.100  27.360  1.00  0.00            
ATOM   2236  N   LYS B  17     103.310  77.440  29.360  1.00  0.00            
ATOM   2237  HN  LYS B  17     103.260  77.620  30.350  1.00  0.00            
ATOM   2238  CA  LYS B  17     102.850  76.140  28.910  1.00  0.00            
ATOM   2239  HA  LYS B  17     102.840  76.090  27.830  1.00  0.00            
ATOM   2240  CB  LYS B  17     103.800  75.060  29.480  1.00  0.00            
ATOM   2241  HB1 LYS B  17     104.800  75.250  29.050  1.00  0.00            
ATOM   2242  HB2 LYS B  17     103.880  75.220  30.580  1.00  0.00            
ATOM   2243  CG  LYS B  17     103.430  73.590  29.230  1.00  0.00            
ATOM   2244  HG1 LYS B  17     102.420  73.380  29.640  1.00  0.00            
ATOM   2245  HG2 LYS B  17     103.400  73.400  28.130  1.00  0.00            
ATOM   2246  CD  LYS B  17     104.470  72.670  29.900  1.00  0.00            
ATOM   2247  HD1 LYS B  17     105.440  72.780  29.360  1.00  0.00            
ATOM   2248  HD2 LYS B  17     104.630  73.040  30.940  1.00  0.00            
ATOM   2249  CE  LYS B  17     104.080  71.200  29.970  1.00  0.00            
ATOM   2250  HE1 LYS B  17     103.150  71.050  30.560  1.00  0.00            
ATOM   2251  HE2 LYS B  17     103.910  70.810  28.940  1.00  0.00            
ATOM   2252  NZ  LYS B  17     105.170  70.400  30.580  1.00  0.00            
ATOM   2253  HZ1 LYS B  17     104.920  69.410  30.690  1.00  0.00            
ATOM   2254  HZ2 LYS B  17     105.940  70.410  29.850  1.00  0.00            
ATOM   2255  HZ3 LYS B  17     105.580  70.740  31.480  1.00  0.00            
ATOM   2256  C   LYS B  17     101.440  75.900  29.390  1.00  0.00            
ATOM   2257  O   LYS B  17     101.160  75.940  30.580  1.00  0.00            
ATOM   2258  N   ILE B  18     100.500  75.640  28.460  1.00  0.00            
ATOM   2259  HN  ILE B  18     100.740  75.660  27.480  1.00  0.00            
ATOM   2260  CA  ILE B  18      99.110  75.370  28.760  1.00  0.00            
ATOM   2261  HA  ILE B  18      98.970  75.310  29.820  1.00  0.00            
ATOM   2262  CB  ILE B  18      98.170  76.440  28.190  1.00  0.00            
ATOM   2263  HB  ILE B  18      98.240  76.430  27.080  1.00  0.00            
ATOM   2264  CG2 ILE B  18      96.720  76.120  28.610  1.00  0.00            
ATOM   2265 1HG2 ILE B  18      96.010  76.880  28.210  1.00  0.00            
ATOM   2266 2HG2 ILE B  18      96.390  75.130  28.220  1.00  0.00            
ATOM   2267 3HG2 ILE B  18      96.630  76.110  29.720  1.00  0.00            
ATOM   2268  CG1 ILE B  18      98.590  77.850  28.680  1.00  0.00            
ATOM   2269 1HG1 ILE B  18      98.520  77.890  29.790  1.00  0.00            
ATOM   2270 2HG1 ILE B  18      99.660  78.030  28.410  1.00  0.00            
ATOM   2271  CD  ILE B  18      97.770  79.000  28.070  1.00  0.00            
ATOM   2272  HD1 ILE B  18      98.150  79.980  28.420  1.00  0.00            
ATOM   2273  HD2 ILE B  18      97.840  78.980  26.960  1.00  0.00            
ATOM   2274  HD3 ILE B  18      96.700  78.920  28.350  1.00  0.00            
ATOM   2275  C   ILE B  18      98.750  74.020  28.160  1.00  0.00            
ATOM   2276  O   ILE B  18      98.900  73.790  26.960  1.00  0.00            
ATOM   2277  N   GLY B  19      98.270  73.080  29.000  1.00  0.00            
ATOM   2278  HN  GLY B  19      98.230  73.260  29.990  1.00  0.00            
ATOM   2279  CA  GLY B  19      97.740  71.800  28.520  1.00  0.00            
ATOM   2280  HA1 GLY B  19      97.660  71.800  27.440  1.00  0.00            
ATOM   2281  HA2 GLY B  19      98.380  71.020  28.900  1.00  0.00            
ATOM   2282  C   GLY B  19      96.370  71.560  29.080  1.00  0.00            
ATOM   2283  O   GLY B  19      96.190  71.610  30.290  1.00  0.00            
ATOM   2284  N   SER B  20      95.380  71.270  28.220  1.00  0.00            
ATOM   2285  HN  SER B  20      95.530  71.300  27.230  1.00  0.00            
ATOM   2286  CA  SER B  20      94.030  70.940  28.650  1.00  0.00            
ATOM   2287  HA  SER B  20      94.030  70.780  29.720  1.00  0.00            
ATOM   2288  CB  SER B  20      92.990  72.060  28.390  1.00  0.00            
ATOM   2289  HB1 SER B  20      91.970  71.710  28.670  1.00  0.00            
ATOM   2290  HB2 SER B  20      93.260  72.910  29.060  1.00  0.00            
ATOM   2291  OG  SER B  20      92.990  72.530  27.040  1.00  0.00            
ATOM   2292  HG1 SER B  20      92.340  73.230  26.980  1.00  0.00            
ATOM   2293  C   SER B  20      93.550  69.630  28.040  1.00  0.00            
ATOM   2294  O   SER B  20      93.580  69.410  26.830  1.00  0.00            
ATOM   2295  N   THR B  21      93.110  68.690  28.900  1.00  0.00            
ATOM   2296  HN  THR B  21      93.140  68.880  29.890  1.00  0.00            
ATOM   2297  CA  THR B  21      92.680  67.360  28.490  1.00  0.00            
ATOM   2298  HA  THR B  21      92.660  67.280  27.410  1.00  0.00            
ATOM   2299  CB  THR B  21      93.570  66.260  29.050  1.00  0.00            
ATOM   2300  HB  THR B  21      93.620  66.360  30.160  1.00  0.00            
ATOM   2301  OG1 THR B  21      94.890  66.370  28.530  1.00  0.00            
ATOM   2302  HG1 THR B  21      95.430  65.790  29.070  1.00  0.00            
ATOM   2303  CG2 THR B  21      93.100  64.850  28.660  1.00  0.00            
ATOM   2304 1HG2 THR B  21      93.790  64.090  29.060  1.00  0.00            
ATOM   2305 2HG2 THR B  21      92.090  64.630  29.070  1.00  0.00            
ATOM   2306 3HG2 THR B  21      93.070  64.750  27.560  1.00  0.00            
ATOM   2307  C   THR B  21      91.280  67.130  29.000  1.00  0.00            
ATOM   2308  O   THR B  21      91.070  67.080  30.210  1.00  0.00            
ATOM   2309  N   GLU B  22      90.280  66.960  28.110  1.00  0.00            
ATOM   2310  HN  GLU B  22      90.470  67.020  27.120  1.00  0.00            
ATOM   2311  CA  GLU B  22      88.900  66.740  28.490  1.00  0.00            
ATOM   2312  HA  GLU B  22      88.860  66.570  29.560  1.00  0.00            
ATOM   2313  CB  GLU B  22      88.020  68.030  28.290  1.00  0.00            
ATOM   2314  HB1 GLU B  22      86.960  67.810  28.520  1.00  0.00            
ATOM   2315  HB2 GLU B  22      88.390  68.760  29.050  1.00  0.00            
ATOM   2316  CG  GLU B  22      88.110  68.800  26.940  1.00  0.00            
ATOM   2317  HG1 GLU B  22      89.150  68.790  26.550  1.00  0.00            
ATOM   2318  HG2 GLU B  22      87.460  68.280  26.210  1.00  0.00            
ATOM   2319  CD  GLU B  22      87.670  70.280  26.990  1.00  0.00            
ATOM   2320  OE1 GLU B  22      88.350  71.140  27.620  1.00  0.00            
ATOM   2321  OE2 GLU B  22      86.670  70.630  26.330  1.00  0.00            
ATOM   2322  C   GLU B  22      88.370  65.430  27.890  1.00  0.00            
ATOM   2323  O   GLU B  22      88.360  65.200  26.680  1.00  0.00            
ATOM   2324  N   ASN B  23      87.990  64.460  28.760  1.00  0.00            
ATOM   2325  HN  ASN B  23      88.010  64.660  29.750  1.00  0.00            
ATOM   2326  CA  ASN B  23      87.620  63.100  28.360  1.00  0.00            
ATOM   2327  HA  ASN B  23      87.580  63.020  27.280  1.00  0.00            
ATOM   2328  CB  ASN B  23      88.570  62.020  28.950  1.00  0.00            
ATOM   2329  HB1 ASN B  23      88.510  62.020  30.060  1.00  0.00            
ATOM   2330  HB2 ASN B  23      88.270  61.010  28.590  1.00  0.00            
ATOM   2331  CG  ASN B  23      90.050  62.200  28.610  1.00  0.00            
ATOM   2332  OD1 ASN B  23      90.910  61.890  29.430  1.00  0.00            
ATOM   2333  ND2 ASN B  23      90.370  62.670  27.390  1.00  0.00            
ATOM   2334 1HD2 ASN B  23      89.670  63.000  26.760  1.00  0.00            
ATOM   2335 2HD2 ASN B  23      91.330  62.630  27.110  1.00  0.00            
ATOM   2336  C   ASN B  23      86.240  62.740  28.890  1.00  0.00            
ATOM   2337  O   ASN B  23      86.050  62.600  30.090  1.00  0.00            
ATOM   2338  N   LEU B  24      85.240  62.520  28.000  1.00  0.00            
ATOM   2339  HN  LEU B  24      85.400  62.600  27.010  1.00  0.00            
ATOM   2340  CA  LEU B  24      83.870  62.240  28.420  1.00  0.00            
ATOM   2341  HA  LEU B  24      83.810  62.230  29.500  1.00  0.00            
ATOM   2342  CB  LEU B  24      82.850  63.290  27.910  1.00  0.00            
ATOM   2343  HB1 LEU B  24      82.710  63.160  26.810  1.00  0.00            
ATOM   2344  HB2 LEU B  24      81.870  63.090  28.390  1.00  0.00            
ATOM   2345  CG  LEU B  24      83.200  64.780  28.140  1.00  0.00            
ATOM   2346  HG  LEU B  24      84.040  65.060  27.460  1.00  0.00            
ATOM   2347  CD1 LEU B  24      81.990  65.680  27.850  1.00  0.00            
ATOM   2348 1HD1 LEU B  24      82.270  66.750  27.990  1.00  0.00            
ATOM   2349 2HD1 LEU B  24      81.620  65.550  26.820  1.00  0.00            
ATOM   2350 3HD1 LEU B  24      81.160  65.440  28.550  1.00  0.00            
ATOM   2351  CD2 LEU B  24      83.650  65.090  29.570  1.00  0.00            
ATOM   2352 1HD2 LEU B  24      83.820  66.180  29.700  1.00  0.00            
ATOM   2353 2HD2 LEU B  24      82.850  64.770  30.250  1.00  0.00            
ATOM   2354 3HD2 LEU B  24      84.590  64.570  29.840  1.00  0.00            
ATOM   2355  C   LEU B  24      83.410  60.880  27.930  1.00  0.00            
ATOM   2356  O   LEU B  24      83.490  60.550  26.750  1.00  0.00            
ATOM   2357  N   LYS B  25      82.890  60.030  28.840  1.00  0.00            
ATOM   2358  HN  LYS B  25      82.910  60.270  29.810  1.00  0.00            
ATOM   2359  CA  LYS B  25      82.310  58.750  28.480  1.00  0.00            
ATOM   2360  HA  LYS B  25      82.270  58.640  27.400  1.00  0.00            
ATOM   2361  CB  LYS B  25      83.120  57.570  29.080  1.00  0.00            
ATOM   2362  HB1 LYS B  25      84.140  57.580  28.630  1.00  0.00            
ATOM   2363  HB2 LYS B  25      83.250  57.770  30.170  1.00  0.00            
ATOM   2364  CG  LYS B  25      82.470  56.180  28.900  1.00  0.00            
ATOM   2365  HG1 LYS B  25      81.410  56.220  29.260  1.00  0.00            
ATOM   2366  HG2 LYS B  25      82.430  55.930  27.820  1.00  0.00            
ATOM   2367  CD  LYS B  25      83.160  55.080  29.710  1.00  0.00            
ATOM   2368  HD1 LYS B  25      84.060  54.760  29.150  1.00  0.00            
ATOM   2369  HD2 LYS B  25      83.500  55.530  30.680  1.00  0.00            
ATOM   2370  CE  LYS B  25      82.200  53.920  30.010  1.00  0.00            
ATOM   2371  HE1 LYS B  25      81.380  54.240  30.680  1.00  0.00            
ATOM   2372  HE2 LYS B  25      81.760  53.540  29.060  1.00  0.00            
ATOM   2373  NZ  LYS B  25      82.940  52.800  30.640  1.00  0.00            
ATOM   2374  HZ1 LYS B  25      82.290  52.010  30.820  1.00  0.00            
ATOM   2375  HZ2 LYS B  25      83.670  52.500  29.950  1.00  0.00            
ATOM   2376  HZ3 LYS B  25      83.410  53.100  31.520  1.00  0.00            
ATOM   2377  C   LYS B  25      80.890  58.630  29.000  1.00  0.00            
ATOM   2378  O   LYS B  25      80.640  58.660  30.200  1.00  0.00            
ATOM   2379  N   HSD B  26      79.930  58.390  28.090  1.00  0.00            
ATOM   2380  HN  HSD B  26      80.140  58.450  27.110  1.00  0.00            
ATOM   2381  CA  HSD B  26      78.570  58.050  28.460  1.00  0.00            
ATOM   2382  HA  HSD B  26      78.430  58.170  29.530  1.00  0.00            
ATOM   2383  CB  HSD B  26      77.530  58.940  27.750  1.00  0.00            
ATOM   2384  HB1 HSD B  26      77.680  58.890  26.650  1.00  0.00            
ATOM   2385  HB2 HSD B  26      76.500  58.580  27.980  1.00  0.00            
ATOM   2386  ND1 HSD B  26      76.740  61.340  27.640  1.00  0.00            
ATOM   2387  HD1 HSD B  26      76.100  61.220  26.880  1.00  0.00            
ATOM   2388  CG  HSD B  26      77.580  60.390  28.170  1.00  0.00            
ATOM   2389  CE1 HSD B  26      77.040  62.520  28.240  1.00  0.00            
ATOM   2390  HE1 HSD B  26      76.550  63.460  28.000  1.00  0.00            
ATOM   2391  NE2 HSD B  26      78.000  62.380  29.130  1.00  0.00            
ATOM   2392  CD2 HSD B  26      78.360  61.050  29.080  1.00  0.00            
ATOM   2393  HD2 HSD B  26      79.160  60.700  29.710  1.00  0.00            
ATOM   2394  C   HSD B  26      78.290  56.590  28.160  1.00  0.00            
ATOM   2395  O   HSD B  26      78.740  56.010  27.170  1.00  0.00            
ATOM   2396  N   GLN B  27      77.510  55.940  29.050  1.00  0.00            
ATOM   2397  HN  GLN B  27      77.170  56.410  29.860  1.00  0.00            
ATOM   2398  CA  GLN B  27      76.950  54.630  28.840  1.00  0.00            
ATOM   2399  HA  GLN B  27      77.010  54.390  27.790  1.00  0.00            
ATOM   2400  CB  GLN B  27      77.760  53.530  29.570  1.00  0.00            
ATOM   2401  HB1 GLN B  27      78.830  53.710  29.290  1.00  0.00            
ATOM   2402  HB2 GLN B  27      77.670  53.670  30.670  1.00  0.00            
ATOM   2403  CG  GLN B  27      77.400  52.080  29.170  1.00  0.00            
ATOM   2404  HG1 GLN B  27      76.420  51.770  29.590  1.00  0.00            
ATOM   2405  HG2 GLN B  27      77.320  51.990  28.060  1.00  0.00            
ATOM   2406  CD  GLN B  27      78.470  51.080  29.620  1.00  0.00            
ATOM   2407  OE1 GLN B  27      78.880  50.160  28.910  1.00  0.00            
ATOM   2408  NE2 GLN B  27      79.020  51.310  30.840  1.00  0.00            
ATOM   2409 1HE2 GLN B  27      78.660  52.090  31.350  1.00  0.00            
ATOM   2410 2HE2 GLN B  27      79.390  50.520  31.300  1.00  0.00            
ATOM   2411  C   GLN B  27      75.470  54.750  29.250  1.00  0.00            
ATOM   2412  O   GLN B  27      75.120  55.770  29.830  1.00  0.00            
ATOM   2413  N   PRO B  28      74.650  53.810  28.750  1.00  0.00            
ATOM   2414  CD  PRO B  28      74.460  54.270  27.400  1.00  0.00            
ATOM   2415  HD1 PRO B  28      74.470  53.350  26.790  1.00  0.00            
ATOM   2416  HD2 PRO B  28      75.250  54.940  26.980  1.00  0.00            
ATOM   2417  CA  PRO B  28      73.270  53.500  29.200  1.00  0.00            
ATOM   2418  HA  PRO B  28      73.200  53.310  30.240  1.00  0.00            
ATOM   2419  CB  PRO B  28      72.450  54.700  28.710  1.00  0.00            
ATOM   2420  HB1 PRO B  28      71.370  54.480  28.570  1.00  0.00            
ATOM   2421  HB2 PRO B  28      72.540  55.560  29.410  1.00  0.00            
ATOM   2422  CG  PRO B  28      73.130  55.060  27.390  1.00  0.00            
ATOM   2423  HG1 PRO B  28      72.480  54.750  26.560  1.00  0.00            
ATOM   2424  HG2 PRO B  28      73.330  56.150  27.320  1.00  0.00            
ATOM   2425  C   PRO B  28      72.660  52.220  28.580  1.00  0.00            
ATOM   2426  O   PRO B  28      72.580  52.050  27.370  1.00  0.00            
ATOM   2427  N   GLY B  29      72.180  51.290  29.430  1.00  0.00            
ATOM   2428  HN  GLY B  29      72.220  51.440  30.430  1.00  0.00            
ATOM   2429  CA  GLY B  29      71.550  50.050  28.980  1.00  0.00            
ATOM   2430  HA1 GLY B  29      71.470  50.040  27.900  1.00  0.00            
ATOM   2431  HA2 GLY B  29      72.140  49.230  29.360  1.00  0.00            
ATOM   2432  C   GLY B  29      70.160  49.900  29.530  1.00  0.00            
ATOM   2433  O   GLY B  29      69.940  49.950  30.740  1.00  0.00            
ATOM   2434  N   GLY B  30      69.150  49.680  28.660  1.00  0.00            
ATOM   2435  HN  GLY B  30      69.360  49.660  27.680  1.00  0.00            
ATOM   2436  CA  GLY B  30      67.760  49.520  29.090  1.00  0.00            
ATOM   2437  HA1 GLY B  30      67.700  49.510  30.170  1.00  0.00            
ATOM   2438  HA2 GLY B  30      67.220  50.340  28.640  1.00  0.00            
ATOM   2439  C   GLY B  30      67.130  48.250  28.590  1.00  0.00            
ATOM   2440  O   GLY B  30      66.810  48.150  27.410  1.00  0.00            
ATOM   2441  N   GLY B  31      66.880  47.280  29.490  1.00  0.00            
ATOM   2442  HN  GLY B  31      67.090  47.440  30.460  1.00  0.00            
ATOM   2443  CA  GLY B  31      66.280  45.990  29.160  1.00  0.00            
ATOM   2444  HA1 GLY B  31      66.240  45.860  28.090  1.00  0.00            
ATOM   2445  HA2 GLY B  31      66.870  45.230  29.650  1.00  0.00            
ATOM   2446  C   GLY B  31      64.880  45.860  29.700  1.00  0.00            
ATOM   2447  O   GLY B  31      64.570  46.300  30.810  1.00  0.00            
ATOM   2448  N   LYS B  32      63.960  45.270  28.910  1.00  0.00            
ATOM   2449  HN  LYS B  32      64.200  44.950  28.000  1.00  0.00            
ATOM   2450  CA  LYS B  32      62.560  45.130  29.300  1.00  0.00            
ATOM   2451  HA  LYS B  32      62.470  45.160  30.370  1.00  0.00            
ATOM   2452  CB  LYS B  32      61.670  46.230  28.630  1.00  0.00            
ATOM   2453  HB1 LYS B  32      61.440  45.920  27.590  1.00  0.00            
ATOM   2454  HB2 LYS B  32      60.710  46.290  29.180  1.00  0.00            
ATOM   2455  CG  LYS B  32      62.340  47.610  28.540  1.00  0.00            
ATOM   2456  HG1 LYS B  32      62.640  47.950  29.560  1.00  0.00            
ATOM   2457  HG2 LYS B  32      63.280  47.500  27.940  1.00  0.00            
ATOM   2458  CD  LYS B  32      61.460  48.650  27.830  1.00  0.00            
ATOM   2459  HD1 LYS B  32      61.090  48.170  26.890  1.00  0.00            
ATOM   2460  HD2 LYS B  32      60.570  48.850  28.460  1.00  0.00            
ATOM   2461  CE  LYS B  32      62.240  49.910  27.480  1.00  0.00            
ATOM   2462  HE1 LYS B  32      62.660  50.380  28.390  1.00  0.00            
ATOM   2463  HE2 LYS B  32      63.080  49.680  26.780  1.00  0.00            
ATOM   2464  NZ  LYS B  32      61.340  50.880  26.820  1.00  0.00            
ATOM   2465  HZ1 LYS B  32      61.880  51.740  26.550  1.00  0.00            
ATOM   2466  HZ2 LYS B  32      60.940  50.430  25.970  1.00  0.00            
ATOM   2467  HZ3 LYS B  32      60.570  51.130  27.460  1.00  0.00            
ATOM   2468  C   LYS B  32      62.050  43.770  28.830  1.00  0.00            
ATOM   2469  O   LYS B  32      62.140  43.480  27.640  1.00  0.00            
ATOM   2470  N   VAL B  33      61.510  42.920  29.730  1.00  0.00            
ATOM   2471  HN  VAL B  33      61.490  43.140  30.710  1.00  0.00            
ATOM   2472  CA  VAL B  33      61.050  41.580  29.390  1.00  0.00            
ATOM   2473  HA  VAL B  33      60.950  41.490  28.310  1.00  0.00            
ATOM   2474  CB  VAL B  33      62.010  40.480  29.870  1.00  0.00            
ATOM   2475  HB  VAL B  33      62.020  40.460  30.980  1.00  0.00            
ATOM   2476  CG1 VAL B  33      61.570  39.100  29.330  1.00  0.00            
ATOM   2477 1HG1 VAL B  33      62.290  38.320  29.640  1.00  0.00            
ATOM   2478 2HG1 VAL B  33      60.570  38.810  29.710  1.00  0.00            
ATOM   2479 3HG1 VAL B  33      61.530  39.120  28.220  1.00  0.00            
ATOM   2480  CG2 VAL B  33      63.450  40.780  29.390  1.00  0.00            
ATOM   2481 1HG2 VAL B  33      64.120  39.950  29.690  1.00  0.00            
ATOM   2482 2HG2 VAL B  33      63.470  40.870  28.280  1.00  0.00            
ATOM   2483 3HG2 VAL B  33      63.830  41.720  29.840  1.00  0.00            
ATOM   2484  C   VAL B  33      59.680  41.310  30.000  1.00  0.00            
ATOM   2485  O   VAL B  33      59.470  41.510  31.200  1.00  0.00            
ATOM   2486  N   GLN B  34      58.690  40.860  29.200  1.00  0.00            
ATOM   2487  HN  GLN B  34      58.850  40.760  28.210  1.00  0.00            
ATOM   2488  CA  GLN B  34      57.360  40.530  29.690  1.00  0.00            
ATOM   2489  HA  GLN B  34      57.390  40.440  30.760  1.00  0.00            
ATOM   2490  CB  GLN B  34      56.310  41.620  29.310  1.00  0.00            
ATOM   2491  HB1 GLN B  34      55.850  41.370  28.330  1.00  0.00            
ATOM   2492  HB2 GLN B  34      55.510  41.590  30.090  1.00  0.00            
ATOM   2493  CG  GLN B  34      56.900  43.040  29.200  1.00  0.00            
ATOM   2494  HG1 GLN B  34      57.450  43.300  30.130  1.00  0.00            
ATOM   2495  HG2 GLN B  34      57.620  43.080  28.360  1.00  0.00            
ATOM   2496  CD  GLN B  34      55.890  44.170  28.950  1.00  0.00            
ATOM   2497  OE1 GLN B  34      56.280  45.340  28.930  1.00  0.00            
ATOM   2498  NE2 GLN B  34      54.600  43.840  28.740  1.00  0.00            
ATOM   2499 1HE2 GLN B  34      54.330  42.880  28.750  1.00  0.00            
ATOM   2500 2HE2 GLN B  34      53.970  44.590  28.580  1.00  0.00            
ATOM   2501  C   GLN B  34      56.900  39.190  29.130  1.00  0.00            
ATOM   2502  O   GLN B  34      56.900  38.990  27.920  1.00  0.00            
ATOM   2503  N   ILE B  35      56.500  38.230  29.990  1.00  0.00            
ATOM   2504  HN  ILE B  35      56.530  38.380  30.990  1.00  0.00            
ATOM   2505  CA  ILE B  35      56.020  36.920  29.560  1.00  0.00            
ATOM   2506  HA  ILE B  35      55.870  36.930  28.490  1.00  0.00            
ATOM   2507  CB  ILE B  35      56.990  35.770  29.860  1.00  0.00            
ATOM   2508  HB  ILE B  35      57.100  35.680  30.970  1.00  0.00            
ATOM   2509  CG2 ILE B  35      56.430  34.440  29.300  1.00  0.00            
ATOM   2510 1HG2 ILE B  35      57.120  33.600  29.510  1.00  0.00            
ATOM   2511 2HG2 ILE B  35      55.460  34.170  29.760  1.00  0.00            
ATOM   2512 3HG2 ILE B  35      56.300  34.510  28.200  1.00  0.00            
ATOM   2513  CG1 ILE B  35      58.390  36.080  29.270  1.00  0.00            
ATOM   2514 1HG1 ILE B  35      58.300  36.170  28.160  1.00  0.00            
ATOM   2515 2HG1 ILE B  35      58.750  37.060  29.650  1.00  0.00            
ATOM   2516  CD  ILE B  35      59.460  35.030  29.610  1.00  0.00            
ATOM   2517  HD1 ILE B  35      60.440  35.330  29.190  1.00  0.00            
ATOM   2518  HD2 ILE B  35      59.560  34.920  30.710  1.00  0.00            
ATOM   2519  HD3 ILE B  35      59.200  34.040  29.180  1.00  0.00            
ATOM   2520  C   ILE B  35      54.660  36.630  30.190  1.00  0.00            
ATOM   2521  O   ILE B  35      54.490  36.690  31.400  1.00  0.00            
ATOM   2522  N   ILE B  36      53.630  36.320  29.370  1.00  0.00            
ATOM   2523  HN  ILE B  36      53.770  36.300  28.380  1.00  0.00            
ATOM   2524  CA  ILE B  36      52.300  36.000  29.880  1.00  0.00            
ATOM   2525  HA  ILE B  36      52.340  35.860  30.950  1.00  0.00            
ATOM   2526  CB  ILE B  36      51.260  37.080  29.580  1.00  0.00            
ATOM   2527  HB  ILE B  36      51.160  37.190  28.480  1.00  0.00            
ATOM   2528  CG2 ILE B  36      49.890  36.680  30.180  1.00  0.00            
ATOM   2529 1HG2 ILE B  36      49.140  37.470  29.980  1.00  0.00            
ATOM   2530 2HG2 ILE B  36      49.510  35.740  29.730  1.00  0.00            
ATOM   2531 3HG2 ILE B  36      49.970  36.540  31.280  1.00  0.00            
ATOM   2532  CG1 ILE B  36      51.720  38.450  30.140  1.00  0.00            
ATOM   2533 1HG1 ILE B  36      51.820  38.370  31.250  1.00  0.00            
ATOM   2534 2HG1 ILE B  36      52.720  38.690  29.730  1.00  0.00            
ATOM   2535  CD  ILE B  36      50.780  39.620  29.800  1.00  0.00            
ATOM   2536  HD1 ILE B  36      51.200  40.570  30.190  1.00  0.00            
ATOM   2537  HD2 ILE B  36      50.660  39.710  28.700  1.00  0.00            
ATOM   2538  HD3 ILE B  36      49.770  39.480  30.250  1.00  0.00            
ATOM   2539  C   ILE B  36      51.830  34.680  29.290  1.00  0.00            
ATOM   2540  O   ILE B  36      51.770  34.500  28.070  1.00  0.00            
ATOM   2541  N   ASN B  37      51.460  33.700  30.140  1.00  0.00            
ATOM   2542  HN  ASN B  37      51.520  33.850  31.130  1.00  0.00            
ATOM   2543  CA  ASN B  37      50.960  32.410  29.680  1.00  0.00            
ATOM   2544  HA  ASN B  37      50.810  32.440  28.610  1.00  0.00            
ATOM   2545  CB  ASN B  37      51.930  31.240  29.990  1.00  0.00            
ATOM   2546  HB1 ASN B  37      51.980  31.060  31.080  1.00  0.00            
ATOM   2547  HB2 ASN B  37      51.590  30.310  29.490  1.00  0.00            
ATOM   2548  CG  ASN B  37      53.360  31.530  29.530  1.00  0.00            
ATOM   2549  OD1 ASN B  37      54.310  31.390  30.300  1.00  0.00            
ATOM   2550  ND2 ASN B  37      53.540  31.950  28.260  1.00  0.00            
ATOM   2551 1HD2 ASN B  37      52.770  32.190  27.680  1.00  0.00            
ATOM   2552 2HD2 ASN B  37      54.480  32.030  27.920  1.00  0.00            
ATOM   2553  C   ASN B  37      49.600  32.120  30.300  1.00  0.00            
ATOM   2554  O   ASN B  37      49.430  32.170  31.520  1.00  0.00            
ATOM   2555  N   LYS B  38      48.580  31.820  29.480  1.00  0.00            
ATOM   2556  HN  LYS B  38      48.720  31.780  28.480  1.00  0.00            
ATOM   2557  CA  LYS B  38      47.240  31.540  29.960  1.00  0.00            
ATOM   2558  HA  LYS B  38      47.250  31.420  31.040  1.00  0.00            
ATOM   2559  CB  LYS B  38      46.220  32.670  29.580  1.00  0.00            
ATOM   2560  HB1 LYS B  38      46.050  32.620  28.480  1.00  0.00            
ATOM   2561  HB2 LYS B  38      45.250  32.440  30.080  1.00  0.00            
ATOM   2562  CG  LYS B  38      46.650  34.120  29.940  1.00  0.00            
ATOM   2563  HG1 LYS B  38      46.790  34.180  31.040  1.00  0.00            
ATOM   2564  HG2 LYS B  38      47.640  34.310  29.460  1.00  0.00            
ATOM   2565  CD  LYS B  38      45.650  35.220  29.450  1.00  0.00            
ATOM   2566  HD1 LYS B  38      45.540  35.080  28.350  1.00  0.00            
ATOM   2567  HD2 LYS B  38      44.670  35.020  29.920  1.00  0.00            
ATOM   2568  CE  LYS B  38      46.090  36.700  29.730  1.00  0.00            
ATOM   2569  HE1 LYS B  38      46.140  36.850  30.830  1.00  0.00            
ATOM   2570  HE2 LYS B  38      47.100  36.860  29.310  1.00  0.00            
ATOM   2571  NZ  LYS B  38      45.200  37.770  29.170  1.00  0.00            
ATOM   2572  HZ1 LYS B  38      45.590  38.760  29.310  1.00  0.00            
ATOM   2573  HZ2 LYS B  38      45.110  37.690  28.150  1.00  0.00            
ATOM   2574  HZ3 LYS B  38      44.250  37.780  29.590  1.00  0.00            
ATOM   2575  C   LYS B  38      46.770  30.200  29.380  1.00  0.00            
ATOM   2576  O   LYS B  38      46.720  30.040  28.170  1.00  0.00            
ATOM   2577  N   LYS B  39      46.430  29.200  30.230  1.00  0.00            
ATOM   2578  HN  LYS B  39      46.490  29.320  31.220  1.00  0.00            
ATOM   2579  CA  LYS B  39      45.910  27.920  29.770  1.00  0.00            
ATOM   2580  HA  LYS B  39      45.750  27.960  28.710  1.00  0.00            
ATOM   2581  CB  LYS B  39      46.880  26.730  30.050  1.00  0.00            
ATOM   2582  HB1 LYS B  39      47.870  26.960  29.610  1.00  0.00            
ATOM   2583  HB2 LYS B  39      47.020  26.630  31.150  1.00  0.00            
ATOM   2584  CG  LYS B  39      46.350  25.410  29.460  1.00  0.00            
ATOM   2585  HG1 LYS B  39      45.290  25.280  29.790  1.00  0.00            
ATOM   2586  HG2 LYS B  39      46.330  25.490  28.350  1.00  0.00            
ATOM   2587  CD  LYS B  39      47.060  24.110  29.880  1.00  0.00            
ATOM   2588  HD1 LYS B  39      48.070  24.040  29.430  1.00  0.00            
ATOM   2589  HD2 LYS B  39      47.160  24.100  30.990  1.00  0.00            
ATOM   2590  CE  LYS B  39      46.160  22.950  29.430  1.00  0.00            
ATOM   2591  HE1 LYS B  39      45.110  23.190  29.740  1.00  0.00            
ATOM   2592  HE2 LYS B  39      46.160  22.850  28.320  1.00  0.00            
ATOM   2593  NZ  LYS B  39      46.460  21.630  30.010  1.00  0.00            
ATOM   2594  HZ1 LYS B  39      45.560  21.080  29.780  1.00  0.00            
ATOM   2595  HZ2 LYS B  39      47.270  21.140  29.610  1.00  0.00            
ATOM   2596  HZ3 LYS B  39      46.470  21.650  31.040  1.00  0.00            
ATOM   2597  C   LYS B  39      44.580  27.610  30.430  1.00  0.00            
ATOM   2598  O   LYS B  39      44.490  27.550  31.650  1.00  0.00            
ATOM   2599  N   LEU B  40      43.500  27.350  29.650  1.00  0.00            
ATOM   2600  HN  LEU B  40      43.570  27.380  28.650  1.00  0.00            
ATOM   2601  CA  LEU B  40      42.240  26.870  30.190  1.00  0.00            
ATOM   2602  HA  LEU B  40      42.330  26.710  31.250  1.00  0.00            
ATOM   2603  CB  LEU B  40      41.040  27.850  29.970  1.00  0.00            
ATOM   2604  HB1 LEU B  40      40.710  27.760  28.910  1.00  0.00            
ATOM   2605  HB2 LEU B  40      40.200  27.510  30.610  1.00  0.00            
ATOM   2606  CG  LEU B  40      41.300  29.350  30.250  1.00  0.00            
ATOM   2607  HG  LEU B  40      42.080  29.710  29.540  1.00  0.00            
ATOM   2608  CD1 LEU B  40      40.010  30.160  30.030  1.00  0.00            
ATOM   2609 1HD1 LEU B  40      40.200  31.240  30.200  1.00  0.00            
ATOM   2610 2HD1 LEU B  40      39.630  30.030  28.990  1.00  0.00            
ATOM   2611 3HD1 LEU B  40      39.220  29.830  30.730  1.00  0.00            
ATOM   2612  CD2 LEU B  40      41.800  29.650  31.670  1.00  0.00            
ATOM   2613 1HD2 LEU B  40      41.950  30.740  31.820  1.00  0.00            
ATOM   2614 2HD2 LEU B  40      41.030  29.300  32.380  1.00  0.00            
ATOM   2615 3HD2 LEU B  40      42.750  29.130  31.890  1.00  0.00            
ATOM   2616  C   LEU B  40      41.900  25.520  29.560  1.00  0.00            
ATOM   2617  O   LEU B  40      42.030  25.350  28.350  1.00  0.00            
ATOM   2618  N   ASP B  41      41.490  24.520  30.370  1.00  0.00            
ATOM   2619  HN  ASP B  41      41.430  24.660  31.370  1.00  0.00            
ATOM   2620  CA  ASP B  41      41.140  23.180  29.950  1.00  0.00            
ATOM   2621  HA  ASP B  41      41.070  23.120  28.870  1.00  0.00            
ATOM   2622  CB  ASP B  41      42.240  22.210  30.500  1.00  0.00            
ATOM   2623  HB1 ASP B  41      43.080  22.810  30.900  1.00  0.00            
ATOM   2624  HB2 ASP B  41      41.830  21.610  31.340  1.00  0.00            
ATOM   2625  CG  ASP B  41      42.800  21.220  29.500  1.00  0.00            
ATOM   2626  OD1 ASP B  41      44.050  20.970  29.550  1.00  0.00            
ATOM   2627  OD2 ASP B  41      42.040  20.710  28.660  1.00  0.00            
ATOM   2628  C   ASP B  41      39.750  22.900  30.560  1.00  0.00            
ATOM   2629  O   ASP B  41      39.610  22.970  31.780  1.00  0.00            
ATOM   2630  N   LEU B  42      38.670  22.650  29.780  1.00  0.00            
ATOM   2631  HN  LEU B  42      38.790  22.520  28.790  1.00  0.00            
ATOM   2632  CA  LEU B  42      37.310  22.590  30.360  1.00  0.00            
ATOM   2633  HA  LEU B  42      37.390  22.360  31.410  1.00  0.00            
ATOM   2634  CB  LEU B  42      36.430  23.870  30.160  1.00  0.00            
ATOM   2635  HB1 LEU B  42      36.090  23.890  29.100  1.00  0.00            
ATOM   2636  HB2 LEU B  42      35.520  23.770  30.790  1.00  0.00            
ATOM   2637  CG  LEU B  42      36.980  25.280  30.440  1.00  0.00            
ATOM   2638  HG  LEU B  42      37.830  25.480  29.760  1.00  0.00            
ATOM   2639  CD1 LEU B  42      35.830  26.270  30.180  1.00  0.00            
ATOM   2640 1HD1 LEU B  42      36.160  27.310  30.350  1.00  0.00            
ATOM   2641 2HD1 LEU B  42      35.450  26.170  29.140  1.00  0.00            
ATOM   2642 3HD1 LEU B  42      34.980  26.050  30.870  1.00  0.00            
ATOM   2643  CD2 LEU B  42      37.450  25.480  31.870  1.00  0.00            
ATOM   2644 1HD2 LEU B  42      37.790  26.520  32.040  1.00  0.00            
ATOM   2645 2HD2 LEU B  42      36.600  25.260  32.540  1.00  0.00            
ATOM   2646 3HD2 LEU B  42      38.280  24.790  32.140  1.00  0.00            
ATOM   2647  C   LEU B  42      36.390  21.540  29.750  1.00  0.00            
ATOM   2648  O   LEU B  42      36.550  21.090  28.620  1.00  0.00            
ATOM   2649  N   SER B  43      35.260  21.260  30.450  1.00  0.00            
ATOM   2650  HN  SER B  43      35.240  21.450  31.430  1.00  0.00            
ATOM   2651  CA  SER B  43      34.010  20.880  29.780  1.00  0.00            
ATOM   2652  HA  SER B  43      34.270  20.650  28.760  1.00  0.00            
ATOM   2653  CB  SER B  43      33.380  19.560  30.280  1.00  0.00            
ATOM   2654  HB1 SER B  43      32.450  19.340  29.700  1.00  0.00            
ATOM   2655  HB2 SER B  43      34.110  18.740  30.070  1.00  0.00            
ATOM   2656  OG  SER B  43      33.080  19.550  31.670  1.00  0.00            
ATOM   2657  HG1 SER B  43      32.950  18.630  31.920  1.00  0.00            
ATOM   2658  C   SER B  43      33.000  22.030  29.620  1.00  0.00            
ATOM   2659  O   SER B  43      33.190  22.900  28.780  1.00  0.00            
ATOM   2660  N   ASN B  44      31.830  22.030  30.320  1.00  0.00            
ATOM   2661  HN  ASN B  44      31.730  21.370  31.050  1.00  0.00            
ATOM   2662  CA  ASN B  44      30.600  22.730  29.880  1.00  0.00            
ATOM   2663  HA  ASN B  44      30.830  23.280  28.990  1.00  0.00            
ATOM   2664  CB  ASN B  44      29.410  21.740  29.630  1.00  0.00            
ATOM   2665  HB1 ASN B  44      29.080  21.260  30.570  1.00  0.00            
ATOM   2666  HB2 ASN B  44      28.550  22.300  29.210  1.00  0.00            
ATOM   2667  CG  ASN B  44      29.680  20.600  28.650  1.00  0.00            
ATOM   2668  OD1 ASN B  44      28.970  19.600  28.600  1.00  0.00            
ATOM   2669  ND2 ASN B  44      30.750  20.720  27.850  1.00  0.00            
ATOM   2670 1HD2 ASN B  44      31.340  21.520  27.960  1.00  0.00            
ATOM   2671 2HD2 ASN B  44      30.970  19.960  27.250  1.00  0.00            
ATOM   2672  C   ASN B  44      30.000  23.750  30.860  1.00  0.00            
ATOM   2673  O   ASN B  44      29.570  23.410  31.950  1.00  0.00            
ATOM   2674  N   VAL B  45      29.900  25.050  30.520  1.00  0.00            
ATOM   2675  HN  VAL B  45      30.170  25.350  29.610  1.00  0.00            
ATOM   2676  CA  VAL B  45      29.690  26.090  31.530  1.00  0.00            
ATOM   2677  HA  VAL B  45      29.180  25.690  32.400  1.00  0.00            
ATOM   2678  CB  VAL B  45      31.090  26.650  31.940  1.00  0.00            
ATOM   2679  HB  VAL B  45      31.550  27.180  31.070  1.00  0.00            
ATOM   2680  CG1 VAL B  45      31.010  27.600  33.120  1.00  0.00            
ATOM   2681 1HG1 VAL B  45      31.990  28.010  33.400  1.00  0.00            
ATOM   2682 2HG1 VAL B  45      30.330  28.420  32.920  1.00  0.00            
ATOM   2683 3HG1 VAL B  45      30.600  27.050  33.980  1.00  0.00            
ATOM   2684  CG2 VAL B  45      32.090  25.580  32.400  1.00  0.00            
ATOM   2685 1HG2 VAL B  45      33.030  26.070  32.750  1.00  0.00            
ATOM   2686 2HG2 VAL B  45      31.680  25.020  33.270  1.00  0.00            
ATOM   2687 3HG2 VAL B  45      32.360  24.870  31.600  1.00  0.00            
ATOM   2688  C   VAL B  45      28.840  27.280  31.020  1.00  0.00            
ATOM   2689  O   VAL B  45      29.420  28.320  30.750  1.00  0.00            
ATOM   2690  N   GLN B  46      27.500  27.230  30.800  1.00  0.00            
ATOM   2691  HN  GLN B  46      26.950  26.440  31.070  1.00  0.00            
ATOM   2692  CA  GLN B  46      26.770  28.310  30.080  1.00  0.00            
ATOM   2693  HA  GLN B  46      27.190  28.340  29.090  1.00  0.00            
ATOM   2694  CB  GLN B  46      25.260  27.990  29.920  1.00  0.00            
ATOM   2695  HB1 GLN B  46      24.800  27.850  30.920  1.00  0.00            
ATOM   2696  HB2 GLN B  46      24.750  28.860  29.450  1.00  0.00            
ATOM   2697  CG  GLN B  46      25.000  26.760  29.030  1.00  0.00            
ATOM   2698  HG1 GLN B  46      25.520  26.920  28.060  1.00  0.00            
ATOM   2699  HG2 GLN B  46      25.390  25.830  29.490  1.00  0.00            
ATOM   2700  CD  GLN B  46      23.520  26.560  28.690  1.00  0.00            
ATOM   2701  OE1 GLN B  46      23.140  26.660  27.520  1.00  0.00            
ATOM   2702  NE2 GLN B  46      22.680  26.230  29.680  1.00  0.00            
ATOM   2703 1HE2 GLN B  46      22.970  26.290  30.640  1.00  0.00            
ATOM   2704 2HE2 GLN B  46      21.720  26.120  29.450  1.00  0.00            
ATOM   2705  C   GLN B  46      26.890  29.760  30.600  1.00  0.00            
ATOM   2706  O   GLN B  46      26.610  30.040  31.770  1.00  0.00            
ATOM   2707  N   SER B  47      27.280  30.710  29.700  1.00  0.00            
ATOM   2708  HN  SER B  47      27.050  30.570  28.730  1.00  0.00            
ATOM   2709  CA  SER B  47      28.510  31.490  29.850  1.00  0.00            
ATOM   2710  HA  SER B  47      28.740  31.620  30.880  1.00  0.00            
ATOM   2711  CB  SER B  47      29.710  30.850  29.070  1.00  0.00            
ATOM   2712  HB1 SER B  47      30.550  31.540  28.840  1.00  0.00            
ATOM   2713  HB2 SER B  47      30.160  30.040  29.650  1.00  0.00            
ATOM   2714  OG  SER B  47      29.230  30.350  27.830  1.00  0.00            
ATOM   2715  HG1 SER B  47      29.810  29.670  27.480  1.00  0.00            
ATOM   2716  C   SER B  47      28.570  32.880  29.280  1.00  0.00            
ATOM   2717  O   SER B  47      27.950  33.210  28.270  1.00  0.00            
ATOM   2718  N   LYS B  48      29.500  33.680  29.870  1.00  0.00            
ATOM   2719  HN  LYS B  48      29.850  33.410  30.760  1.00  0.00            
ATOM   2720  CA  LYS B  48      30.280  34.690  29.180  1.00  0.00            
ATOM   2721  HA  LYS B  48      30.430  34.360  28.160  1.00  0.00            
ATOM   2722  CB  LYS B  48      29.640  36.110  29.190  1.00  0.00            
ATOM   2723  HB1 LYS B  48      29.340  36.350  30.220  1.00  0.00            
ATOM   2724  HB2 LYS B  48      30.400  36.860  28.870  1.00  0.00            
ATOM   2725  CG  LYS B  48      28.450  36.200  28.240  1.00  0.00            
ATOM   2726  HG1 LYS B  48      28.830  36.020  27.220  1.00  0.00            
ATOM   2727  HG2 LYS B  48      27.730  35.380  28.470  1.00  0.00            
ATOM   2728  CD  LYS B  48      27.620  37.480  28.310  1.00  0.00            
ATOM   2729  HD1 LYS B  48      27.060  37.430  29.250  1.00  0.00            
ATOM   2730  HD2 LYS B  48      28.290  38.370  28.320  1.00  0.00            
ATOM   2731  CE  LYS B  48      26.630  37.530  27.160  1.00  0.00            
ATOM   2732  HE1 LYS B  48      27.200  37.770  26.250  1.00  0.00            
ATOM   2733  HE2 LYS B  48      26.120  36.540  27.040  1.00  0.00            
ATOM   2734  NZ  LYS B  48      25.600  38.570  27.380  1.00  0.00            
ATOM   2735  HZ1 LYS B  48      24.960  38.600  26.560  1.00  0.00            
ATOM   2736  HZ2 LYS B  48      25.040  38.320  28.210  1.00  0.00            
ATOM   2737  HZ3 LYS B  48      26.060  39.490  27.510  1.00  0.00            
ATOM   2738  C   LYS B  48      31.660  34.790  29.820  1.00  0.00            
ATOM   2739  O   LYS B  48      31.800  34.630  31.030  1.00  0.00            
ATOM   2740  N   CYS B  49      32.710  35.080  29.020  1.00  0.00            
ATOM   2741  HN  CYS B  49      32.610  35.140  28.030  1.00  0.00            
ATOM   2742  CA  CYS B  49      34.030  35.430  29.530  1.00  0.00            
ATOM   2743  HA  CYS B  49      33.960  35.630  30.580  1.00  0.00            
ATOM   2744  CB  CYS B  49      35.090  34.300  29.330  1.00  0.00            
ATOM   2745  HB1 CYS B  49      34.630  33.350  29.690  1.00  0.00            
ATOM   2746  HB2 CYS B  49      35.280  34.170  28.250  1.00  0.00            
ATOM   2747  SG  CYS B  49      36.650  34.580  30.240  1.00  0.00            
ATOM   2748  HG1 CYS B  49      37.300  33.510  29.790  1.00  0.00            
ATOM   2749  C   CYS B  49      34.510  36.700  28.850  1.00  0.00            
ATOM   2750  O   CYS B  49      34.270  36.920  27.670  1.00  0.00            
ATOM   2751  N   GLY B  50      35.190  37.600  29.590  1.00  0.00            
ATOM   2752  HN  GLY B  50      35.330  37.460  30.570  1.00  0.00            
ATOM   2753  CA  GLY B  50      35.840  38.760  28.990  1.00  0.00            
ATOM   2754  HA1 GLY B  50      36.000  38.590  27.940  1.00  0.00            
ATOM   2755  HA2 GLY B  50      35.240  39.630  29.200  1.00  0.00            
ATOM   2756  C   GLY B  50      37.190  38.990  29.610  1.00  0.00            
ATOM   2757  O   GLY B  50      37.350  38.840  30.820  1.00  0.00            
ATOM   2758  N   SER B  51      38.190  39.400  28.810  1.00  0.00            
ATOM   2759  HN  SER B  51      38.090  39.430  27.820  1.00  0.00            
ATOM   2760  CA  SER B  51      39.470  39.830  29.350  1.00  0.00            
ATOM   2761  HA  SER B  51      39.320  40.130  30.370  1.00  0.00            
ATOM   2762  CB  SER B  51      40.580  38.750  29.380  1.00  0.00            
ATOM   2763  HB1 SER B  51      41.520  39.200  29.790  1.00  0.00            
ATOM   2764  HB2 SER B  51      40.240  37.960  30.090  1.00  0.00            
ATOM   2765  OG  SER B  51      40.840  38.160  28.110  1.00  0.00            
ATOM   2766  HG1 SER B  51      41.360  37.370  28.260  1.00  0.00            
ATOM   2767  C   SER B  51      39.950  41.080  28.640  1.00  0.00            
ATOM   2768  O   SER B  51      39.740  41.280  27.450  1.00  0.00            
ATOM   2769  N   LYS B  52      40.560  42.020  29.380  1.00  0.00            
ATOM   2770  HN  LYS B  52      40.730  41.890  30.350  1.00  0.00            
ATOM   2771  CA  LYS B  52      41.060  43.230  28.760  1.00  0.00            
ATOM   2772  HA  LYS B  52      41.260  43.050  27.710  1.00  0.00            
ATOM   2773  CB  LYS B  52      40.030  44.390  28.870  1.00  0.00            
ATOM   2774  HB1 LYS B  52      39.060  44.040  28.460  1.00  0.00            
ATOM   2775  HB2 LYS B  52      39.870  44.590  29.950  1.00  0.00            
ATOM   2776  CG  LYS B  52      40.470  45.660  28.140  1.00  0.00            
ATOM   2777  HG1 LYS B  52      41.560  45.830  28.340  1.00  0.00            
ATOM   2778  HG2 LYS B  52      40.390  45.500  27.040  1.00  0.00            
ATOM   2779  CD  LYS B  52      39.740  46.940  28.570  1.00  0.00            
ATOM   2780  HD1 LYS B  52      38.730  46.960  28.110  1.00  0.00            
ATOM   2781  HD2 LYS B  52      39.620  46.900  29.670  1.00  0.00            
ATOM   2782  CE  LYS B  52      40.590  48.150  28.170  1.00  0.00            
ATOM   2783  HE1 LYS B  52      41.610  48.030  28.620  1.00  0.00            
ATOM   2784  HE2 LYS B  52      40.690  48.210  27.070  1.00  0.00            
ATOM   2785  NZ  LYS B  52      40.030  49.420  28.670  1.00  0.00            
ATOM   2786  HZ1 LYS B  52      40.690  50.190  28.410  1.00  0.00            
ATOM   2787  HZ2 LYS B  52      39.090  49.580  28.280  1.00  0.00            
ATOM   2788  HZ3 LYS B  52      39.980  49.370  29.710  1.00  0.00            
ATOM   2789  C   LYS B  52      42.380  43.660  29.370  1.00  0.00            
ATOM   2790  O   LYS B  52      42.460  43.940  30.570  1.00  0.00            
ATOM   2791  N   ASP B  53      43.420  43.790  28.540  1.00  0.00            
ATOM   2792  HN  ASP B  53      43.300  43.610  27.560  1.00  0.00            
ATOM   2793  CA  ASP B  53      44.790  43.960  28.960  1.00  0.00            
ATOM   2794  HA  ASP B  53      44.830  44.020  30.040  1.00  0.00            
ATOM   2795  CB  ASP B  53      45.650  42.710  28.480  1.00  0.00            
ATOM   2796  HB1 ASP B  53      45.670  42.730  27.370  1.00  0.00            
ATOM   2797  HB2 ASP B  53      46.690  42.840  28.840  1.00  0.00            
ATOM   2798  CG  ASP B  53      45.210  41.280  28.880  1.00  0.00            
ATOM   2799  OD1 ASP B  53      46.080  40.350  28.950  1.00  0.00            
ATOM   2800  OD2 ASP B  53      44.000  40.990  29.070  1.00  0.00            
ATOM   2801  C   ASP B  53      45.270  45.330  28.390  1.00  0.00            
ATOM   2802  O   ASP B  53      45.140  45.610  27.200  1.00  0.00            
ATOM   2803  N   ASN B  54      45.800  46.280  29.210  1.00  0.00            
ATOM   2804  HN  ASN B  54      45.880  46.090  30.190  1.00  0.00            
ATOM   2805  CA  ASN B  54      46.160  47.630  28.750  1.00  0.00            
ATOM   2806  HA  ASN B  54      46.310  47.600  27.680  1.00  0.00            
ATOM   2807  CB  ASN B  54      45.020  48.650  29.110  1.00  0.00            
ATOM   2808  HB1 ASN B  54      44.160  48.080  29.510  1.00  0.00            
ATOM   2809  HB2 ASN B  54      45.360  49.340  29.900  1.00  0.00            
ATOM   2810  CG  ASN B  54      44.490  49.520  27.970  1.00  0.00            
ATOM   2811  OD1 ASN B  54      43.270  49.600  27.730  1.00  0.00            
ATOM   2812  ND2 ASN B  54      45.390  50.290  27.320  1.00  0.00            
ATOM   2813 1HD2 ASN B  54      46.360  50.180  27.490  1.00  0.00            
ATOM   2814 2HD2 ASN B  54      45.060  50.840  26.560  1.00  0.00            
ATOM   2815  C   ASN B  54      47.480  48.140  29.370  1.00  0.00            
ATOM   2816  O   ASN B  54      47.580  48.270  30.590  1.00  0.00            
ATOM   2817  N   ILE B  55      48.510  48.490  28.560  1.00  0.00            
ATOM   2818  HN  ILE B  55      48.430  48.410  27.560  1.00  0.00            
ATOM   2819  CA  ILE B  55      49.860  48.810  29.060  1.00  0.00            
ATOM   2820  HA  ILE B  55      49.820  48.960  30.130  1.00  0.00            
ATOM   2821  CB  ILE B  55      50.850  47.660  28.800  1.00  0.00            
ATOM   2822  HB  ILE B  55      50.950  47.520  27.700  1.00  0.00            
ATOM   2823  CG2 ILE B  55      52.240  47.980  29.400  1.00  0.00            
ATOM   2824 1HG2 ILE B  55      52.950  47.140  29.210  1.00  0.00            
ATOM   2825 2HG2 ILE B  55      52.690  48.880  28.930  1.00  0.00            
ATOM   2826 3HG2 ILE B  55      52.170  48.130  30.490  1.00  0.00            
ATOM   2827  CG1 ILE B  55      50.300  46.320  29.390  1.00  0.00            
ATOM   2828 1HG1 ILE B  55      50.210  46.420  30.490  1.00  0.00            
ATOM   2829 2HG1 ILE B  55      49.290  46.120  28.980  1.00  0.00            
ATOM   2830  CD  ILE B  55      51.160  45.090  29.060  1.00  0.00            
ATOM   2831  HD1 ILE B  55      50.670  44.170  29.470  1.00  0.00            
ATOM   2832  HD2 ILE B  55      51.260  44.960  27.960  1.00  0.00            
ATOM   2833  HD3 ILE B  55      52.170  45.170  29.520  1.00  0.00            
ATOM   2834  C   ILE B  55      50.400  50.130  28.460  1.00  0.00            
ATOM   2835  O   ILE B  55      50.260  50.380  27.260  1.00  0.00            
ATOM   2836  N   LYS B  56      51.020  51.040  29.270  1.00  0.00            
ATOM   2837  HN  LYS B  56      51.070  50.850  30.250  1.00  0.00            
ATOM   2838  CA  LYS B  56      51.620  52.280  28.780  1.00  0.00            
ATOM   2839  HA  LYS B  56      51.840  52.150  27.730  1.00  0.00            
ATOM   2840  CB  LYS B  56      50.650  53.500  28.910  1.00  0.00            
ATOM   2841  HB1 LYS B  56      49.680  53.200  28.460  1.00  0.00            
ATOM   2842  HB2 LYS B  56      50.460  53.680  29.990  1.00  0.00            
ATOM   2843  CG  LYS B  56      51.100  54.830  28.240  1.00  0.00            
ATOM   2844  HG1 LYS B  56      52.110  55.100  28.630  1.00  0.00            
ATOM   2845  HG2 LYS B  56      51.200  54.660  27.150  1.00  0.00            
ATOM   2846  CD  LYS B  56      50.160  56.040  28.500  1.00  0.00            
ATOM   2847  HD1 LYS B  56      49.160  55.810  28.060  1.00  0.00            
ATOM   2848  HD2 LYS B  56      50.030  56.150  29.600  1.00  0.00            
ATOM   2849  CE  LYS B  56      50.680  57.380  27.920  1.00  0.00            
ATOM   2850  HE1 LYS B  56      51.740  57.530  28.220  1.00  0.00            
ATOM   2851  HE2 LYS B  56      50.640  57.350  26.810  1.00  0.00            
ATOM   2852  NZ  LYS B  56      49.930  58.590  28.350  1.00  0.00            
ATOM   2853  HZ1 LYS B  56      50.390  59.450  27.900  1.00  0.00            
ATOM   2854  HZ2 LYS B  56      48.950  58.680  28.030  1.00  0.00            
ATOM   2855  HZ3 LYS B  56      49.990  58.810  29.360  1.00  0.00            
ATOM   2856  C   LYS B  56      52.960  52.600  29.480  1.00  0.00            
ATOM   2857  O   LYS B  56      53.100  52.510  30.690  1.00  0.00            
ATOM   2858  N   HSD B  57      54.020  53.000  28.740  1.00  0.00            
ATOM   2859  HN  HSD B  57      53.920  53.040  27.740  1.00  0.00            
ATOM   2860  CA  HSD B  57      55.310  53.370  29.340  1.00  0.00            
ATOM   2861  HA  HSD B  57      55.340  53.110  30.380  1.00  0.00            
ATOM   2862  CB  HSD B  57      56.530  52.750  28.590  1.00  0.00            
ATOM   2863  HB1 HSD B  57      56.490  53.060  27.520  1.00  0.00            
ATOM   2864  HB2 HSD B  57      57.460  53.150  29.030  1.00  0.00            
ATOM   2865  ND1 HSD B  57      57.740  50.640  27.990  1.00  0.00            
ATOM   2866  HD1 HSD B  57      58.350  51.090  27.350  1.00  0.00            
ATOM   2867  CG  HSD B  57      56.660  51.260  28.590  1.00  0.00            
ATOM   2868  CE1 HSD B  57      57.530  49.300  28.090  1.00  0.00            
ATOM   2869  HE1 HSD B  57      58.170  48.530  27.650  1.00  0.00            
ATOM   2870  NE2 HSD B  57      56.410  49.040  28.710  1.00  0.00            
ATOM   2871  CD2 HSD B  57      55.840  50.260  29.010  1.00  0.00            
ATOM   2872  HD2 HSD B  57      54.860  50.280  29.460  1.00  0.00            
ATOM   2873  C   HSD B  57      55.570  54.870  29.200  1.00  0.00            
ATOM   2874  O   HSD B  57      55.480  55.350  28.090  1.00  0.00            
ATOM   2875  N   VAL B  58      55.960  55.600  30.260  1.00  0.00            
ATOM   2876  HN  VAL B  58      55.900  55.250  31.200  1.00  0.00            
ATOM   2877  CA  VAL B  58      56.190  57.060  30.260  1.00  0.00            
ATOM   2878  HA  VAL B  58      56.270  57.410  29.240  1.00  0.00            
ATOM   2879  CB  VAL B  58      55.020  57.800  30.930  1.00  0.00            
ATOM   2880  HB  VAL B  58      55.030  57.620  32.030  1.00  0.00            
ATOM   2881  CG1 VAL B  58      55.090  59.330  30.690  1.00  0.00            
ATOM   2882 1HG1 VAL B  58      54.230  59.830  31.180  1.00  0.00            
ATOM   2883 2HG1 VAL B  58      56.010  59.770  31.130  1.00  0.00            
ATOM   2884 3HG1 VAL B  58      55.060  59.560  29.610  1.00  0.00            
ATOM   2885  CG2 VAL B  58      53.660  57.310  30.380  1.00  0.00            
ATOM   2886 1HG2 VAL B  58      52.850  57.920  30.840  1.00  0.00            
ATOM   2887 2HG2 VAL B  58      53.630  57.470  29.280  1.00  0.00            
ATOM   2888 3HG2 VAL B  58      53.480  56.240  30.610  1.00  0.00            
ATOM   2889  C   VAL B  58      57.510  57.460  30.980  1.00  0.00            
ATOM   2890  O   VAL B  58      57.480  58.110  32.020  1.00  0.00            
ATOM   2891  N   PRO B  59      58.710  57.040  30.560  1.00  0.00            
ATOM   2892  CD  PRO B  59      59.090  55.710  31.080  1.00  0.00            
ATOM   2893  HD1 PRO B  59      58.710  54.930  30.380  1.00  0.00            
ATOM   2894  HD2 PRO B  59      58.670  55.560  32.100  1.00  0.00            
ATOM   2895  CA  PRO B  59      59.870  57.900  30.780  1.00  0.00            
ATOM   2896  HA  PRO B  59      59.900  58.140  31.820  1.00  0.00            
ATOM   2897  CB  PRO B  59      61.020  56.970  30.430  1.00  0.00            
ATOM   2898  HB1 PRO B  59      61.040  56.800  29.330  1.00  0.00            
ATOM   2899  HB2 PRO B  59      62.000  57.390  30.750  1.00  0.00            
ATOM   2900  CG  PRO B  59      60.630  55.710  31.180  1.00  0.00            
ATOM   2901  HG1 PRO B  59      61.100  54.810  30.760  1.00  0.00            
ATOM   2902  HG2 PRO B  59      60.920  55.840  32.240  1.00  0.00            
ATOM   2903  C   PRO B  59      60.040  59.230  30.040  1.00  0.00            
ATOM   2904  O   PRO B  59      59.770  59.340  28.860  1.00  0.00            
ATOM   2905  N   GLY B  60      60.630  60.240  30.710  1.00  0.00            
ATOM   2906  HN  GLY B  60      60.720  60.170  31.700  1.00  0.00            
ATOM   2907  CA  GLY B  60      61.210  61.380  30.020  1.00  0.00            
ATOM   2908  HA1 GLY B  60      61.390  61.130  28.980  1.00  0.00            
ATOM   2909  HA2 GLY B  60      60.530  62.210  30.140  1.00  0.00            
ATOM   2910  C   GLY B  60      62.530  61.780  30.610  1.00  0.00            
ATOM   2911  O   GLY B  60      62.640  61.970  31.820  1.00  0.00            
ATOM   2912  N   GLY B  61      63.580  61.930  29.770  1.00  0.00            
ATOM   2913  HN  GLY B  61      63.440  61.800  28.790  1.00  0.00            
ATOM   2914  CA  GLY B  61      64.900  62.400  30.180  1.00  0.00            
ATOM   2915  HA1 GLY B  61      64.950  62.500  31.260  1.00  0.00            
ATOM   2916  HA2 GLY B  61      65.620  61.710  29.800  1.00  0.00            
ATOM   2917  C   GLY B  61      65.210  63.750  29.580  1.00  0.00            
ATOM   2918  O   GLY B  61      64.610  64.170  28.600  1.00  0.00            
ATOM   2919  N   GLY B  62      66.190  64.470  30.160  1.00  0.00            
ATOM   2920  HN  GLY B  62      66.630  64.170  31.000  1.00  0.00            
ATOM   2921  CA  GLY B  62      66.690  65.700  29.570  1.00  0.00            
ATOM   2922  HA1 GLY B  62      66.820  65.560  28.510  1.00  0.00            
ATOM   2923  HA2 GLY B  62      66.010  66.500  29.820  1.00  0.00            
ATOM   2924  C   GLY B  62      68.020  66.050  30.170  1.00  0.00            
ATOM   2925  O   GLY B  62      68.150  66.040  31.390  1.00  0.00            
ATOM   2926  N   SER B  63      69.040  66.340  29.350  1.00  0.00            
ATOM   2927  HN  SER B  63      68.930  66.320  28.350  1.00  0.00            
ATOM   2928  CA  SER B  63      70.390  66.620  29.830  1.00  0.00            
ATOM   2929  HA  SER B  63      70.380  66.740  30.900  1.00  0.00            
ATOM   2930  CB  SER B  63      71.390  65.460  29.530  1.00  0.00            
ATOM   2931  HB1 SER B  63      72.410  65.750  29.860  1.00  0.00            
ATOM   2932  HB2 SER B  63      71.070  64.580  30.130  1.00  0.00            
ATOM   2933  OG  SER B  63      71.410  65.090  28.140  1.00  0.00            
ATOM   2934  HG1 SER B  63      72.030  64.360  28.050  1.00  0.00            
ATOM   2935  C   SER B  63      70.930  67.920  29.260  1.00  0.00            
ATOM   2936  O   SER B  63      70.880  68.170  28.060  1.00  0.00            
ATOM   2937  N   VAL B  64      71.460  68.810  30.130  1.00  0.00            
ATOM   2938  HN  VAL B  64      71.440  68.620  31.120  1.00  0.00            
ATOM   2939  CA  VAL B  64      71.970  70.110  29.730  1.00  0.00            
ATOM   2940  HA  VAL B  64      72.010  70.180  28.660  1.00  0.00            
ATOM   2941  CB  VAL B  64      71.090  71.260  30.260  1.00  0.00            
ATOM   2942  HB  VAL B  64      71.120  71.260  31.370  1.00  0.00            
ATOM   2943  CG1 VAL B  64      71.600  72.620  29.740  1.00  0.00            
ATOM   2944 1HG1 VAL B  64      70.930  73.430  30.110  1.00  0.00            
ATOM   2945 2HG1 VAL B  64      72.620  72.840  30.090  1.00  0.00            
ATOM   2946 3HG1 VAL B  64      71.590  72.640  28.630  1.00  0.00            
ATOM   2947  CG2 VAL B  64      69.630  71.040  29.820  1.00  0.00            
ATOM   2948 1HG2 VAL B  64      69.000  71.890  30.160  1.00  0.00            
ATOM   2949 2HG2 VAL B  64      69.570  70.980  28.710  1.00  0.00            
ATOM   2950 3HG2 VAL B  64      69.210  70.110  30.250  1.00  0.00            
ATOM   2951  C   VAL B  64      73.390  70.300  30.260  1.00  0.00            
ATOM   2952  O   VAL B  64      73.640  70.160  31.460  1.00  0.00            
ATOM   2953  N   GLN B  65      74.360  70.610  29.380  1.00  0.00            
ATOM   2954  HN  GLN B  65      74.160  70.650  28.400  1.00  0.00            
ATOM   2955  CA  GLN B  65      75.730  70.900  29.770  1.00  0.00            
ATOM   2956  HA  GLN B  65      75.810  70.970  30.840  1.00  0.00            
ATOM   2957  CB  GLN B  65      76.680  69.780  29.270  1.00  0.00            
ATOM   2958  HB1 GLN B  65      76.250  68.800  29.570  1.00  0.00            
ATOM   2959  HB2 GLN B  65      76.680  69.800  28.150  1.00  0.00            
ATOM   2960  CG  GLN B  65      78.130  69.880  29.800  1.00  0.00            
ATOM   2961  HG1 GLN B  65      78.500  70.930  29.730  1.00  0.00            
ATOM   2962  HG2 GLN B  65      78.190  69.580  30.870  1.00  0.00            
ATOM   2963  CD  GLN B  65      79.100  69.040  28.980  1.00  0.00            
ATOM   2964  OE1 GLN B  65      80.040  69.550  28.370  1.00  0.00            
ATOM   2965  NE2 GLN B  65      78.870  67.710  28.920  1.00  0.00            
ATOM   2966 1HE2 GLN B  65      78.100  67.320  29.410  1.00  0.00            
ATOM   2967 2HE2 GLN B  65      79.530  67.170  28.400  1.00  0.00            
ATOM   2968  C   GLN B  65      76.190  72.230  29.180  1.00  0.00            
ATOM   2969  O   GLN B  65      76.130  72.440  27.970  1.00  0.00            
ATOM   2970  N   ILE B  66      76.670  73.160  30.020  1.00  0.00            
ATOM   2971  HN  ILE B  66      76.680  73.000  31.020  1.00  0.00            
ATOM   2972  CA  ILE B  66      77.170  74.460  29.580  1.00  0.00            
ATOM   2973  HA  ILE B  66      77.270  74.460  28.500  1.00  0.00            
ATOM   2974  CB  ILE B  66      76.250  75.620  29.970  1.00  0.00            
ATOM   2975  HB  ILE B  66      76.200  75.680  31.090  1.00  0.00            
ATOM   2976  CG2 ILE B  66      76.830  76.950  29.430  1.00  0.00            
ATOM   2977 1HG2 ILE B  66      76.170  77.800  29.700  1.00  0.00            
ATOM   2978 2HG2 ILE B  66      77.830  77.170  29.850  1.00  0.00            
ATOM   2979 3HG2 ILE B  66      76.910  76.910  28.320  1.00  0.00            
ATOM   2980  CG1 ILE B  66      74.810  75.380  29.450  1.00  0.00            
ATOM   2981 1HG1 ILE B  66      74.830  75.350  28.340  1.00  0.00            
ATOM   2982 2HG1 ILE B  66      74.450  74.390  29.800  1.00  0.00            
ATOM   2983  CD  ILE B  66      73.790  76.430  29.920  1.00  0.00            
ATOM   2984  HD1 ILE B  66      72.780  76.180  29.540  1.00  0.00            
ATOM   2985  HD2 ILE B  66      73.750  76.460  31.030  1.00  0.00            
ATOM   2986  HD3 ILE B  66      74.050  77.440  29.540  1.00  0.00            
ATOM   2987  C   ILE B  66      78.570  74.700  30.150  1.00  0.00            
ATOM   2988  O   ILE B  66      78.770  74.650  31.360  1.00  0.00            
ATOM   2989  N   VAL B  67      79.570  74.950  29.290  1.00  0.00            
ATOM   2990  HN  VAL B  67      79.400  74.950  28.300  1.00  0.00            
ATOM   2991  CA  VAL B  67      80.960  75.130  29.700  1.00  0.00            
ATOM   2992  HA  VAL B  67      81.020  75.160  30.780  1.00  0.00            
ATOM   2993  CB  VAL B  67      81.850  73.990  29.210  1.00  0.00            
ATOM   2994  HB  VAL B  67      81.840  73.970  28.090  1.00  0.00            
ATOM   2995  CG1 VAL B  67      83.290  74.160  29.710  1.00  0.00            
ATOM   2996 1HG1 VAL B  67      83.890  73.280  29.390  1.00  0.00            
ATOM   2997 2HG1 VAL B  67      83.770  75.080  29.310  1.00  0.00            
ATOM   2998 3HG1 VAL B  67      83.310  74.200  30.820  1.00  0.00            
ATOM   2999  CG2 VAL B  67      81.290  72.640  29.700  1.00  0.00            
ATOM   3000 1HG2 VAL B  67      81.950  71.810  29.370  1.00  0.00            
ATOM   3001 2HG2 VAL B  67      81.240  72.620  30.810  1.00  0.00            
ATOM   3002 3HG2 VAL B  67      80.280  72.440  29.300  1.00  0.00            
ATOM   3003  C   VAL B  67      81.520  76.450  29.190  1.00  0.00            
ATOM   3004  O   VAL B  67      81.510  76.730  27.990  1.00  0.00            
ATOM   3005  N   TYR B  68      82.060  77.310  30.090  1.00  0.00            
ATOM   3006  HN  TYR B  68      82.000  77.090  31.070  1.00  0.00            
ATOM   3007  CA  TYR B  68      82.660  78.590  29.760  1.00  0.00            
ATOM   3008  HA  TYR B  68      82.760  78.650  28.690  1.00  0.00            
ATOM   3009  CB  TYR B  68      81.640  79.740  30.160  1.00  0.00            
ATOM   3010  HB1 TYR B  68      81.310  80.200  29.200  1.00  0.00            
ATOM   3011  HB2 TYR B  68      80.740  79.230  30.570  1.00  0.00            
ATOM   3012  CG  TYR B  68      81.900  80.910  31.110  1.00  0.00            
ATOM   3013  CD1 TYR B  68      83.050  81.180  31.890  1.00  0.00            
ATOM   3014  HD1 TYR B  68      83.900  80.540  31.910  1.00  0.00            
ATOM   3015  CE1 TYR B  68      83.140  82.330  32.680  1.00  0.00            
ATOM   3016  HE1 TYR B  68      84.040  82.520  33.240  1.00  0.00            
ATOM   3017  CZ  TYR B  68      82.090  83.240  32.730  1.00  0.00            
ATOM   3018  OH  TYR B  68      82.230  84.420  33.490  1.00  0.00            
ATOM   3019  HH  TYR B  68      81.380  84.860  33.470  1.00  0.00            
ATOM   3020  CD2 TYR B  68      80.830  81.830  31.210  1.00  0.00            
ATOM   3021  HD2 TYR B  68      79.930  81.650  30.650  1.00  0.00            
ATOM   3022  CE2 TYR B  68      80.920  82.980  32.010  1.00  0.00            
ATOM   3023  HE2 TYR B  68      80.090  83.660  32.070  1.00  0.00            
ATOM   3024  C   TYR B  68      84.100  78.640  30.290  1.00  0.00            
ATOM   3025  O   TYR B  68      84.370  78.320  31.450  1.00  0.00            
ATOM   3026  N   LYS B  69      85.080  79.030  29.440  1.00  0.00            
ATOM   3027  HN  LYS B  69      84.890  79.120  28.460  1.00  0.00            
ATOM   3028  CA  LYS B  69      86.490  79.150  29.860  1.00  0.00            
ATOM   3029  HA  LYS B  69      86.530  79.280  30.930  1.00  0.00            
ATOM   3030  CB  LYS B  69      87.310  77.850  29.490  1.00  0.00            
ATOM   3031  HB1 LYS B  69      87.460  77.830  28.390  1.00  0.00            
ATOM   3032  HB2 LYS B  69      88.310  77.940  29.970  1.00  0.00            
ATOM   3033  CG  LYS B  69      86.680  76.490  29.890  1.00  0.00            
ATOM   3034  HG1 LYS B  69      86.390  76.530  30.960  1.00  0.00            
ATOM   3035  HG2 LYS B  69      85.740  76.370  29.300  1.00  0.00            
ATOM   3036  CD  LYS B  69      87.560  75.220  29.650  1.00  0.00            
ATOM   3037  HD1 LYS B  69      87.960  75.270  28.610  1.00  0.00            
ATOM   3038  HD2 LYS B  69      88.420  75.260  30.350  1.00  0.00            
ATOM   3039  CE  LYS B  69      86.800  73.870  29.820  1.00  0.00            
ATOM   3040  HE1 LYS B  69      86.320  73.870  30.820  1.00  0.00            
ATOM   3041  HE2 LYS B  69      86.000  73.810  29.050  1.00  0.00            
ATOM   3042  NZ  LYS B  69      87.620  72.630  29.730  1.00  0.00            
ATOM   3043  HZ1 LYS B  69      87.050  71.820  30.120  1.00  0.00            
ATOM   3044  HZ2 LYS B  69      87.880  72.290  28.760  1.00  0.00            
ATOM   3045  HZ3 LYS B  69      88.450  72.620  30.330  1.00  0.00            
ATOM   3046  C   LYS B  69      87.190  80.400  29.240  1.00  0.00            
ATOM   3047  O   LYS B  69      87.810  80.230  28.190  1.00  0.00            
ATOM   3048  N   PRO B  70      87.150  81.640  29.780  1.00  0.00            
ATOM   3049  CD  PRO B  70      86.020  82.070  30.610  1.00  0.00            
ATOM   3050  HD1 PRO B  70      86.190  81.770  31.660  1.00  0.00            
ATOM   3051  HD2 PRO B  70      85.080  81.610  30.230  1.00  0.00            
ATOM   3052  CA  PRO B  70      87.750  82.800  29.100  1.00  0.00            
ATOM   3053  HA  PRO B  70      88.050  82.550  28.090  1.00  0.00            
ATOM   3054  CB  PRO B  70      86.620  83.850  29.130  1.00  0.00            
ATOM   3055  HB1 PRO B  70      86.990  84.890  29.030  1.00  0.00            
ATOM   3056  HB2 PRO B  70      85.900  83.650  28.320  1.00  0.00            
ATOM   3057  CG  PRO B  70      85.920  83.590  30.450  1.00  0.00            
ATOM   3058  HG1 PRO B  70      86.490  84.100  31.250  1.00  0.00            
ATOM   3059  HG2 PRO B  70      84.860  83.950  30.470  1.00  0.00            
ATOM   3060  C   PRO B  70      88.980  83.380  29.790  1.00  0.00            
ATOM   3061  O   PRO B  70      89.010  83.540  31.020  1.00  0.00            
ATOM   3062  N   VAL B  71      90.030  83.760  29.030  1.00  0.00            
ATOM   3063  HN  VAL B  71      89.980  83.670  28.030  1.00  0.00            
ATOM   3064  CA  VAL B  71      91.280  84.290  29.590  1.00  0.00            
ATOM   3065  HA  VAL B  71      91.180  84.410  30.650  1.00  0.00            
ATOM   3066  CB  VAL B  71      92.440  83.330  29.350  1.00  0.00            
ATOM   3067  HB  VAL B  71      92.630  83.220  28.260  1.00  0.00            
ATOM   3068  CG1 VAL B  71      93.730  83.840  30.040  1.00  0.00            
ATOM   3069 1HG1 VAL B  71      94.550  83.100  29.900  1.00  0.00            
ATOM   3070 2HG1 VAL B  71      94.060  84.800  29.610  1.00  0.00            
ATOM   3071 3HG1 VAL B  71      93.560  83.970  31.130  1.00  0.00            
ATOM   3072  CG2 VAL B  71      92.080  81.940  29.930  1.00  0.00            
ATOM   3073 1HG2 VAL B  71      92.940  81.240  29.810  1.00  0.00            
ATOM   3074 2HG2 VAL B  71      91.850  82.020  31.010  1.00  0.00            
ATOM   3075 3HG2 VAL B  71      91.210  81.500  29.410  1.00  0.00            
ATOM   3076  C   VAL B  71      91.580  85.680  29.020  1.00  0.00            
ATOM   3077  O   VAL B  71      91.470  85.910  27.810  1.00  0.00            
ATOM   3078  N   ASP B  72      91.930  86.650  29.880  1.00  0.00            
ATOM   3079  HN  ASP B  72      92.000  86.450  30.860  1.00  0.00            
ATOM   3080  CA  ASP B  72      92.210  88.040  29.510  1.00  0.00            
ATOM   3081  HA  ASP B  72      92.310  88.120  28.450  1.00  0.00            
ATOM   3082  CB  ASP B  72      90.980  88.860  30.040  1.00  0.00            
ATOM   3083  HB1 ASP B  72      90.090  88.220  29.930  1.00  0.00            
ATOM   3084  HB2 ASP B  72      91.130  89.070  31.110  1.00  0.00            
ATOM   3085  CG  ASP B  72      90.680  90.160  29.320  1.00  0.00            
ATOM   3086  OD1 ASP B  72      89.790  90.930  29.800  1.00  0.00            
ATOM   3087  OD2 ASP B  72      91.180  90.430  28.210  1.00  0.00            
ATOM   3088  C   ASP B  72      93.530  88.460  30.180  1.00  0.00            
ATOM   3089  O   ASP B  72      93.590  88.550  31.410  1.00  0.00            
ATOM   3090  N   LEU B  73      94.640  88.710  29.450  1.00  0.00            
ATOM   3091  HN  LEU B  73      94.600  88.710  28.450  1.00  0.00            
ATOM   3092  CA  LEU B  73      95.940  88.970  30.090  1.00  0.00            
ATOM   3093  HA  LEU B  73      95.810  89.060  31.160  1.00  0.00            
ATOM   3094  CB  LEU B  73      97.020  87.870  29.860  1.00  0.00            
ATOM   3095  HB1 LEU B  73      97.370  87.940  28.810  1.00  0.00            
ATOM   3096  HB2 LEU B  73      97.890  88.100  30.510  1.00  0.00            
ATOM   3097  CG  LEU B  73      96.610  86.410  30.130  1.00  0.00            
ATOM   3098  HG  LEU B  73      95.790  86.140  29.410  1.00  0.00            
ATOM   3099  CD1 LEU B  73      97.800  85.460  29.900  1.00  0.00            
ATOM   3100 1HD1 LEU B  73      97.490  84.410  30.070  1.00  0.00            
ATOM   3101 2HD1 LEU B  73      98.190  85.550  28.870  1.00  0.00            
ATOM   3102 3HD1 LEU B  73      98.620  85.710  30.610  1.00  0.00            
ATOM   3103  CD2 LEU B  73      96.090  86.170  31.540  1.00  0.00            
ATOM   3104 1HD2 LEU B  73      95.820  85.100  31.680  1.00  0.00            
ATOM   3105 2HD2 LEU B  73      96.890  86.420  32.250  1.00  0.00            
ATOM   3106 3HD2 LEU B  73      95.200  86.780  31.770  1.00  0.00            
ATOM   3107  C   LEU B  73      96.560  90.290  29.650  1.00  0.00            
ATOM   3108  O   LEU B  73      96.420  90.690  28.500  1.00  0.00            
ATOM   3109  N   SER B  74      97.290  90.960  30.580  1.00  0.00            
ATOM   3110  HN  SER B  74      97.250  90.670  31.540  1.00  0.00            
ATOM   3111  CA  SER B  74      98.130  92.140  30.350  1.00  0.00            
ATOM   3112  HA  SER B  74      98.360  92.460  31.360  1.00  0.00            
ATOM   3113  CB  SER B  74      99.540  91.910  29.740  1.00  0.00            
ATOM   3114  HB1 SER B  74     100.050  92.890  29.600  1.00  0.00            
ATOM   3115  HB2 SER B  74     100.130  91.320  30.470  1.00  0.00            
ATOM   3116  OG  SER B  74      99.530  91.190  28.500  1.00  0.00            
ATOM   3117  HG1 SER B  74     100.440  91.130  28.200  1.00  0.00            
ATOM   3118  C   SER B  74      97.410  93.350  29.780  1.00  0.00            
ATOM   3119  O   SER B  74      97.490  93.660  28.590  1.00  0.00            
ATOM   3120  N   LYS B  75      96.630  94.040  30.630  1.00  0.00            
ATOM   3121  HN  LYS B  75      96.690  93.870  31.620  1.00  0.00            
ATOM   3122  CA  LYS B  75      95.530  94.840  30.140  1.00  0.00            
ATOM   3123  HA  LYS B  75      95.710  95.060  29.100  1.00  0.00            
ATOM   3124  CB  LYS B  75      94.260  93.990  30.230  1.00  0.00            
ATOM   3125  HB1 LYS B  75      94.490  93.020  29.730  1.00  0.00            
ATOM   3126  HB2 LYS B  75      94.030  93.750  31.300  1.00  0.00            
ATOM   3127  CG  LYS B  75      93.050  94.620  29.540  1.00  0.00            
ATOM   3128  HG1 LYS B  75      92.580  95.400  30.190  1.00  0.00            
ATOM   3129  HG2 LYS B  75      93.400  95.130  28.610  1.00  0.00            
ATOM   3130  CD  LYS B  75      92.060  93.530  29.150  1.00  0.00            
ATOM   3131  HD1 LYS B  75      92.650  92.740  28.620  1.00  0.00            
ATOM   3132  HD2 LYS B  75      91.640  93.060  30.060  1.00  0.00            
ATOM   3133  CE  LYS B  75      90.950  94.020  28.230  1.00  0.00            
ATOM   3134  HE1 LYS B  75      90.230  94.660  28.780  1.00  0.00            
ATOM   3135  HE2 LYS B  75      91.370  94.590  27.370  1.00  0.00            
ATOM   3136  NZ  LYS B  75      90.270  92.830  27.720  1.00  0.00            
ATOM   3137  HZ1 LYS B  75      89.500  93.030  27.070  1.00  0.00            
ATOM   3138  HZ2 LYS B  75      90.970  92.180  27.270  1.00  0.00            
ATOM   3139  HZ3 LYS B  75      89.970  92.220  28.530  1.00  0.00            
ATOM   3140  C   LYS B  75      95.280  96.160  30.830  1.00  0.00            
ATOM   3141  O   LYS B  75      95.180  96.270  32.050  1.00  0.00            
ATOM   3142  N   VAL B  76      95.120  97.230  30.030  1.00  0.00            
ATOM   3143  HN  VAL B  76      95.210  97.130  29.040  1.00  0.00            
ATOM   3144  CA  VAL B  76      94.880  98.580  30.540  1.00  0.00            
ATOM   3145  HA  VAL B  76      94.520  98.530  31.560  1.00  0.00            
ATOM   3146  CB  VAL B  76      96.160  99.440  30.540  1.00  0.00            
ATOM   3147  HB  VAL B  76      96.520  99.550  29.490  1.00  0.00            
ATOM   3148  CG1 VAL B  76      95.940 100.840  31.140  1.00  0.00            
ATOM   3149 1HG1 VAL B  76      96.880 101.440  31.060  1.00  0.00            
ATOM   3150 2HG1 VAL B  76      95.140 101.410  30.620  1.00  0.00            
ATOM   3151 3HG1 VAL B  76      95.680 100.770  32.210  1.00  0.00            
ATOM   3152  CG2 VAL B  76      97.260  98.740  31.360  1.00  0.00            
ATOM   3153 1HG2 VAL B  76      98.150  99.390  31.450  1.00  0.00            
ATOM   3154 2HG2 VAL B  76      96.890  98.510  32.380  1.00  0.00            
ATOM   3155 3HG2 VAL B  76      97.580  97.790  30.880  1.00  0.00            
ATOM   3156  C   VAL B  76      93.770  99.230  29.720  1.00  0.00            
ATOM   3157  O   VAL B  76      94.020 100.150  28.960  1.00  0.00            
ATOM   3158  N   THR B  77      92.510  98.740  29.820  1.00  0.00            
ATOM   3159  HN  THR B  77      92.360  97.890  30.320  1.00  0.00            
ATOM   3160  CA  THR B  77      91.250  99.510  29.570  1.00  0.00            
ATOM   3161  HA  THR B  77      91.290 100.390  30.190  1.00  0.00            
ATOM   3162  CB  THR B  77      90.970 100.000  28.200  1.00  0.00            
ATOM   3163  HB  THR B  77      89.890  99.980  27.890  1.00  0.00            
ATOM   3164  OG1 THR B  77      91.660  99.090  27.410  1.00  0.00            
ATOM   3165  HG1 THR B  77      92.240  99.630  26.860  1.00  0.00            
ATOM   3166  CG2 THR B  77      91.450 101.450  27.990  1.00  0.00            
ATOM   3167 1HG2 THR B  77      91.260 101.780  26.950  1.00  0.00            
ATOM   3168 2HG2 THR B  77      90.910 102.130  28.680  1.00  0.00            
ATOM   3169 3HG2 THR B  77      92.530 101.580  28.190  1.00  0.00            
ATOM   3170  C   THR B  77      89.970  98.780  29.980  1.00  0.00            
ATOM   3171  O   THR B  77      89.920  97.560  30.170  1.00  0.00            
ATOM   3172  N   SER B  78      88.890  99.590  30.120  1.00  0.00            
ATOM   3173  HN  SER B  78      89.010 100.570  29.990  1.00  0.00            
ATOM   3174  CA  SER B  78      87.490  99.230  30.280  1.00  0.00            
ATOM   3175  HA  SER B  78      87.350  99.080  31.330  1.00  0.00            
ATOM   3176  CB  SER B  78      86.530 100.410  29.890  1.00  0.00            
ATOM   3177  HB1 SER B  78      85.480 100.060  29.870  1.00  0.00            
ATOM   3178  HB2 SER B  78      86.620 101.180  30.690  1.00  0.00            
ATOM   3179  OG  SER B  78      86.900 101.010  28.650  1.00  0.00            
ATOM   3180  HG1 SER B  78      86.230 101.670  28.440  1.00  0.00            
ATOM   3181  C   SER B  78      87.000  97.960  29.600  1.00  0.00            
ATOM   3182  O   SER B  78      87.130  97.740  28.400  1.00  0.00            
ATOM   3183  N   LYS B  79      86.380  97.080  30.380  1.00  0.00            
ATOM   3184  HN  LYS B  79      86.330  97.240  31.370  1.00  0.00            
ATOM   3185  CA  LYS B  79      85.810  95.850  29.880  1.00  0.00            
ATOM   3186  HA  LYS B  79      85.770  95.860  28.800  1.00  0.00            
ATOM   3187  CB  LYS B  79      86.640  94.640  30.380  1.00  0.00            
ATOM   3188  HB1 LYS B  79      87.690  94.800  30.030  1.00  0.00            
ATOM   3189  HB2 LYS B  79      86.650  94.670  31.490  1.00  0.00            
ATOM   3190  CG  LYS B  79      86.130  93.270  29.900  1.00  0.00            
ATOM   3191  HG1 LYS B  79      85.060  93.140  30.180  1.00  0.00            
ATOM   3192  HG2 LYS B  79      86.190  93.240  28.790  1.00  0.00            
ATOM   3193  CD  LYS B  79      86.960  92.130  30.520  1.00  0.00            
ATOM   3194  HD1 LYS B  79      88.020  92.350  30.280  1.00  0.00            
ATOM   3195  HD2 LYS B  79      86.840  92.180  31.630  1.00  0.00            
ATOM   3196  CE  LYS B  79      86.590  90.720  30.030  1.00  0.00            
ATOM   3197  HE1 LYS B  79      85.580  90.430  30.390  1.00  0.00            
ATOM   3198  HE2 LYS B  79      86.600  90.700  28.920  1.00  0.00            
ATOM   3199  NZ  LYS B  79      87.580  89.740  30.520  1.00  0.00            
ATOM   3200  HZ1 LYS B  79      87.440  88.790  30.120  1.00  0.00            
ATOM   3201  HZ2 LYS B  79      88.540  90.090  30.220  1.00  0.00            
ATOM   3202  HZ3 LYS B  79      87.600  89.680  31.550  1.00  0.00            
ATOM   3203  C   LYS B  79      84.390  95.700  30.380  1.00  0.00            
ATOM   3204  O   LYS B  79      84.150  95.780  31.580  1.00  0.00            
ATOM   3205  N   CYS B  80      83.440  95.440  29.470  1.00  0.00            
ATOM   3206  HN  CYS B  80      83.640  95.470  28.480  1.00  0.00            
ATOM   3207  CA  CYS B  80      82.120  94.980  29.830  1.00  0.00            
ATOM   3208  HA  CYS B  80      82.050  94.840  30.900  1.00  0.00            
ATOM   3209  CB  CYS B  80      81.010  95.970  29.390  1.00  0.00            
ATOM   3210  HB1 CYS B  80      81.340  96.990  29.680  1.00  0.00            
ATOM   3211  HB2 CYS B  80      80.920  95.970  28.280  1.00  0.00            
ATOM   3212  SG  CYS B  80      79.390  95.630  30.180  1.00  0.00            
ATOM   3213  HG1 CYS B  80      78.710  96.590  29.570  1.00  0.00            
ATOM   3214  C   CYS B  80      81.900  93.620  29.180  1.00  0.00            
ATOM   3215  O   CYS B  80      82.430  93.330  28.110  1.00  0.00            
ATOM   3216  N   GLY B  81      81.150  92.730  29.850  1.00  0.00            
ATOM   3217  HN  GLY B  81      80.770  92.960  30.740  1.00  0.00            
ATOM   3218  CA  GLY B  81      80.730  91.470  29.260  1.00  0.00            
ATOM   3219  HA1 GLY B  81      80.610  91.580  28.190  1.00  0.00            
ATOM   3220  HA2 GLY B  81      81.450  90.710  29.540  1.00  0.00            
ATOM   3221  C   GLY B  81      79.410  91.080  29.840  1.00  0.00            
ATOM   3222  O   GLY B  81      79.310  90.900  31.050  1.00  0.00            
ATOM   3223  N   SER B  82      78.370  90.960  29.010  1.00  0.00            
ATOM   3224  HN  SER B  82      78.470  91.090  28.020  1.00  0.00            
ATOM   3225  CA  SER B  82      77.010  90.700  29.450  1.00  0.00            
ATOM   3226  HA  SER B  82      77.000  90.560  30.520  1.00  0.00            
ATOM   3227  CB  SER B  82      76.040  91.880  29.160  1.00  0.00            
ATOM   3228  HB1 SER B  82      74.990  91.590  29.410  1.00  0.00            
ATOM   3229  HB2 SER B  82      76.330  92.720  29.830  1.00  0.00            
ATOM   3230  OG  SER B  82      76.110  92.340  27.810  1.00  0.00            
ATOM   3231  HG1 SER B  82      75.410  92.990  27.700  1.00  0.00            
ATOM   3232  C   SER B  82      76.470  89.420  28.840  1.00  0.00            
ATOM   3233  O   SER B  82      76.390  89.270  27.620  1.00  0.00            
ATOM   3234  N   LEU B  83      76.120  88.430  29.670  1.00  0.00            
ATOM   3235  HN  LEU B  83      76.170  88.570  30.670  1.00  0.00            
ATOM   3236  CA  LEU B  83      75.680  87.120  29.190  1.00  0.00            
ATOM   3237  HA  LEU B  83      75.640  87.120  28.110  1.00  0.00            
ATOM   3238  CB  LEU B  83      76.610  85.960  29.640  1.00  0.00            
ATOM   3239  HB1 LEU B  83      76.440  85.770  30.730  1.00  0.00            
ATOM   3240  HB2 LEU B  83      76.290  85.040  29.100  1.00  0.00            
ATOM   3241  CG  LEU B  83      78.130  86.140  29.440  1.00  0.00            
ATOM   3242  HG  LEU B  83      78.480  86.920  30.160  1.00  0.00            
ATOM   3243  CD1 LEU B  83      78.840  84.810  29.750  1.00  0.00            
ATOM   3244 1HD1 LEU B  83      79.940  84.950  29.770  1.00  0.00            
ATOM   3245 2HD1 LEU B  83      78.520  84.410  30.740  1.00  0.00            
ATOM   3246 3HD1 LEU B  83      78.580  84.050  28.990  1.00  0.00            
ATOM   3247  CD2 LEU B  83      78.550  86.590  28.050  1.00  0.00            
ATOM   3248 1HD2 LEU B  83      79.650  86.660  27.960  1.00  0.00            
ATOM   3249 2HD2 LEU B  83      78.180  85.840  27.320  1.00  0.00            
ATOM   3250 3HD2 LEU B  83      78.120  87.570  27.780  1.00  0.00            
ATOM   3251  C   LEU B  83      74.280  86.810  29.700  1.00  0.00            
ATOM   3252  O   LEU B  83      74.020  86.850  30.910  1.00  0.00            
ATOM   3253  N   GLY B  84      73.340  86.470  28.810  1.00  0.00            
ATOM   3254  HN  GLY B  84      73.560  86.490  27.820  1.00  0.00            
ATOM   3255  CA  GLY B  84      71.980  86.110  29.180  1.00  0.00            
ATOM   3256  HA1 GLY B  84      71.890  86.030  30.250  1.00  0.00            
ATOM   3257  HA2 GLY B  84      71.330  86.860  28.760  1.00  0.00            
ATOM   3258  C   GLY B  84      71.550  84.780  28.600  1.00  0.00            
ATOM   3259  O   GLY B  84      71.510  84.610  27.380  1.00  0.00            
ATOM   3260  N   ASN B  85      71.180  83.810  29.450  1.00  0.00            
ATOM   3261  HN  ASN B  85      71.210  83.970  30.440  1.00  0.00            
ATOM   3262  CA  ASN B  85      70.740  82.490  29.000  1.00  0.00            
ATOM   3263  HA  ASN B  85      70.660  82.470  27.930  1.00  0.00            
ATOM   3264  CB  ASN B  85      71.710  81.370  29.460  1.00  0.00            
ATOM   3265  HB1 ASN B  85      71.660  81.250  30.570  1.00  0.00            
ATOM   3266  HB2 ASN B  85      71.420  80.400  29.010  1.00  0.00            
ATOM   3267  CG  ASN B  85      73.160  81.660  29.100  1.00  0.00            
ATOM   3268  OD1 ASN B  85      74.060  81.610  29.940  1.00  0.00            
ATOM   3269  ND2 ASN B  85      73.430  81.980  27.820  1.00  0.00            
ATOM   3270 1HD2 ASN B  85      72.710  82.020  27.140  1.00  0.00            
ATOM   3271 2HD2 ASN B  85      74.380  82.090  27.550  1.00  0.00            
ATOM   3272  C   ASN B  85      69.350  82.180  29.550  1.00  0.00            
ATOM   3273  O   ASN B  85      69.140  82.240  30.760  1.00  0.00            
ATOM   3274  N   ILE B  86      68.380  81.860  28.670  1.00  0.00            
ATOM   3275  HN  ILE B  86      68.570  81.860  27.680  1.00  0.00            
ATOM   3276  CA  ILE B  86      67.000  81.580  29.020  1.00  0.00            
ATOM   3277  HA  ILE B  86      66.910  81.500  30.100  1.00  0.00            
ATOM   3278  CB  ILE B  86      66.050  82.690  28.560  1.00  0.00            
ATOM   3279  HB  ILE B  86      66.070  82.750  27.440  1.00  0.00            
ATOM   3280  CG2 ILE B  86      64.610  82.360  29.000  1.00  0.00            
ATOM   3281 1HG2 ILE B  86      63.890  83.140  28.660  1.00  0.00            
ATOM   3282 2HG2 ILE B  86      64.240  81.410  28.580  1.00  0.00            
ATOM   3283 3HG2 ILE B  86      64.530  82.310  30.110  1.00  0.00            
ATOM   3284  CG1 ILE B  86      66.490  84.080  29.110  1.00  0.00            
ATOM   3285 1HG1 ILE B  86      66.430  84.040  30.220  1.00  0.00            
ATOM   3286 2HG1 ILE B  86      67.550  84.270  28.830  1.00  0.00            
ATOM   3287  CD  ILE B  86      65.640  85.250  28.600  1.00  0.00            
ATOM   3288  HD1 ILE B  86      66.020  86.220  29.000  1.00  0.00            
ATOM   3289  HD2 ILE B  86      65.650  85.280  27.490  1.00  0.00            
ATOM   3290  HD3 ILE B  86      64.580  85.140  28.930  1.00  0.00            
ATOM   3291  C   ILE B  86      66.590  80.230  28.420  1.00  0.00            
ATOM   3292  O   ILE B  86      66.740  80.010  27.210  1.00  0.00            
ATOM   3293  N   HSD B  87      66.110  79.270  29.230  1.00  0.00            
ATOM   3294  HN  HSD B  87      66.010  79.470  30.210  1.00  0.00            
ATOM   3295  CA  HSD B  87      65.720  77.940  28.760  1.00  0.00            
ATOM   3296  HA  HSD B  87      65.700  77.910  27.680  1.00  0.00            
ATOM   3297  CB  HSD B  87      66.680  76.840  29.320  1.00  0.00            
ATOM   3298  HB1 HSD B  87      66.780  76.990  30.410  1.00  0.00            
ATOM   3299  HB2 HSD B  87      66.240  75.840  29.150  1.00  0.00            
ATOM   3300  ND1 HSD B  87      69.020  75.930  29.240  1.00  0.00            
ATOM   3301  HD1 HSD B  87      69.000  75.500  30.150  1.00  0.00            
ATOM   3302  CG  HSD B  87      68.060  76.780  28.730  1.00  0.00            
ATOM   3303  CE1 HSD B  87      70.100  76.010  28.430  1.00  0.00            
ATOM   3304  HE1 HSD B  87      71.020  75.450  28.610  1.00  0.00            
ATOM   3305  NE2 HSD B  87      69.910  76.850  27.440  1.00  0.00            
ATOM   3306  CD2 HSD B  87      68.630  77.350  27.630  1.00  0.00            
ATOM   3307  HD2 HSD B  87      68.230  78.090  26.940  1.00  0.00            
ATOM   3308  C   HSD B  87      64.340  77.530  29.260  1.00  0.00            
ATOM   3309  O   HSD B  87      64.160  77.340  30.460  1.00  0.00            
ATOM   3310  N   HSD B  88      63.360  77.310  28.360  1.00  0.00            
ATOM   3311  HN  HSD B  88      63.540  77.430  27.380  1.00  0.00            
ATOM   3312  CA  HSD B  88      61.970  76.990  28.720  1.00  0.00            
ATOM   3313  HA  HSD B  88      61.900  76.910  29.800  1.00  0.00            
ATOM   3314  CB  HSD B  88      60.990  78.110  28.280  1.00  0.00            
ATOM   3315  HB1 HSD B  88      61.050  78.260  27.190  1.00  0.00            
ATOM   3316  HB2 HSD B  88      59.940  77.830  28.530  1.00  0.00            
ATOM   3317  ND1 HSD B  88      60.660  80.640  28.590  1.00  0.00            
ATOM   3318  HD1 HSD B  88      60.080  80.890  27.800  1.00  0.00            
ATOM   3319  CG  HSD B  88      61.240  79.450  28.950  1.00  0.00            
ATOM   3320  CE1 HSD B  88      61.100  81.590  29.460  1.00  0.00            
ATOM   3321  HE1 HSD B  88      60.790  82.640  29.390  1.00  0.00            
ATOM   3322  NE2 HSD B  88      61.930  81.070  30.350  1.00  0.00            
ATOM   3323  CD2 HSD B  88      62.000  79.740  30.040  1.00  0.00            
ATOM   3324  HD2 HSD B  88      62.600  79.110  30.680  1.00  0.00            
ATOM   3325  C   HSD B  88      61.470  75.660  28.160  1.00  0.00            
ATOM   3326  O   HSD B  88      61.710  75.280  27.010  1.00  0.00            
ATOM   3327  N   LYS B  89      60.700  74.890  28.970  1.00  0.00            
ATOM   3328  HN  LYS B  89      60.600  75.190  29.920  1.00  0.00            
ATOM   3329  CA  LYS B  89      59.810  73.820  28.490  1.00  0.00            
ATOM   3330  HA  LYS B  89      60.070  73.620  27.460  1.00  0.00            
ATOM   3331  CB  LYS B  89      60.040  72.530  29.320  1.00  0.00            
ATOM   3332  HB1 LYS B  89      61.100  72.560  29.660  1.00  0.00            
ATOM   3333  HB2 LYS B  89      59.410  72.540  30.230  1.00  0.00            
ATOM   3334  CG  LYS B  89      59.870  71.220  28.510  1.00  0.00            
ATOM   3335  HG1 LYS B  89      58.830  71.180  28.100  1.00  0.00            
ATOM   3336  HG2 LYS B  89      60.560  71.260  27.640  1.00  0.00            
ATOM   3337  CD  LYS B  89      60.160  69.960  29.340  1.00  0.00            
ATOM   3338  HD1 LYS B  89      61.250  69.950  29.570  1.00  0.00            
ATOM   3339  HD2 LYS B  89      59.600  70.060  30.300  1.00  0.00            
ATOM   3340  CE  LYS B  89      59.750  68.660  28.630  1.00  0.00            
ATOM   3341  HE1 LYS B  89      58.670  68.700  28.370  1.00  0.00            
ATOM   3342  HE2 LYS B  89      60.340  68.530  27.700  1.00  0.00            
ATOM   3343  NZ  LYS B  89      59.970  67.460  29.480  1.00  0.00            
ATOM   3344  HZ1 LYS B  89      59.680  66.590  28.990  1.00  0.00            
ATOM   3345  HZ2 LYS B  89      60.980  67.380  29.730  1.00  0.00            
ATOM   3346  HZ3 LYS B  89      59.390  67.550  30.340  1.00  0.00            
ATOM   3347  C   LYS B  89      58.400  74.450  28.460  1.00  0.00            
ATOM   3348  O   LYS B  89      58.400  75.540  27.890  1.00  0.00            
ATOM   3349  N   PRO B  90      57.170  74.120  28.890  1.00  0.00            
ATOM   3350  CD  PRO B  90      56.600  75.190  29.710  1.00  0.00            
ATOM   3351  HD1 PRO B  90      55.880  75.810  29.120  1.00  0.00            
ATOM   3352  HD2 PRO B  90      57.370  75.880  30.150  1.00  0.00            
ATOM   3353  CA  PRO B  90      56.560  72.820  29.230  1.00  0.00            
ATOM   3354  HA  PRO B  90      57.130  72.000  28.820  1.00  0.00            
ATOM   3355  CB  PRO B  90      56.510  72.990  30.720  1.00  0.00            
ATOM   3356  HB1 PRO B  90      55.870  72.220  31.200  1.00  0.00            
ATOM   3357  HB2 PRO B  90      57.530  72.950  31.140  1.00  0.00            
ATOM   3358  CG  PRO B  90      55.940  74.430  30.830  1.00  0.00            
ATOM   3359  HG1 PRO B  90      54.840  74.430  30.710  1.00  0.00            
ATOM   3360  HG2 PRO B  90      56.130  74.960  31.770  1.00  0.00            
ATOM   3361  C   PRO B  90      55.080  72.580  28.800  1.00  0.00            
ATOM   3362  O   PRO B  90      54.630  71.430  28.870  1.00  0.00            
ATOM   3363  N   GLY B  91      54.300  73.620  28.420  1.00  0.00            
ATOM   3364  HN  GLY B  91      54.750  74.510  28.350  1.00  0.00            
ATOM   3365  CA  GLY B  91      52.870  73.680  28.160  1.00  0.00            
ATOM   3366  HA1 GLY B  91      52.670  73.180  27.220  1.00  0.00            
ATOM   3367  HA2 GLY B  91      52.330  73.300  29.020  1.00  0.00            
ATOM   3368  C   GLY B  91      52.570  75.150  27.990  1.00  0.00            
ATOM   3369  O   GLY B  91      53.340  75.850  27.350  1.00  0.00            
ATOM   3370  N   GLY B  92      51.480  75.670  28.590  1.00  0.00            
ATOM   3371  HN  GLY B  92      50.830  75.130  29.100  1.00  0.00            
ATOM   3372  CA  GLY B  92      51.250  77.110  28.640  1.00  0.00            
ATOM   3373  HA1 GLY B  92      52.150  77.610  28.990  1.00  0.00            
ATOM   3374  HA2 GLY B  92      50.910  77.450  27.670  1.00  0.00            
ATOM   3375  C   GLY B  92      50.170  77.370  29.650  1.00  0.00            
ATOM   3376  O   GLY B  92      49.760  76.450  30.360  1.00  0.00            
ATOM   3377  N   GLY B  93      49.600  78.590  29.780  1.00  0.00            
ATOM   3378  HN  GLY B  93      48.900  78.640  30.480  1.00  0.00            
ATOM   3379  CA  GLY B  93      49.920  79.830  29.070  1.00  0.00            
ATOM   3380  HA1 GLY B  93      50.190  79.600  28.050  1.00  0.00            
ATOM   3381  HA2 GLY B  93      49.040  80.460  29.120  1.00  0.00            
ATOM   3382  C   GLY B  93      51.040  80.640  29.670  1.00  0.00            
ATOM   3383  O   GLY B  93      51.400  80.450  30.830  1.00  0.00            
ATOM   3384  N   GLN B  94      51.610  81.570  28.880  1.00  0.00            
ATOM   3385  HN  GLN B  94      51.300  81.720  27.940  1.00  0.00            
ATOM   3386  CA  GLN B  94      52.860  82.220  29.210  1.00  0.00            
ATOM   3387  HA  GLN B  94      52.990  82.260  30.290  1.00  0.00            
ATOM   3388  CB  GLN B  94      53.960  81.360  28.550  1.00  0.00            
ATOM   3389  HB1 GLN B  94      53.720  80.310  28.820  1.00  0.00            
ATOM   3390  HB2 GLN B  94      53.880  81.440  27.450  1.00  0.00            
ATOM   3391  CG  GLN B  94      55.430  81.610  28.980  1.00  0.00            
ATOM   3392  HG1 GLN B  94      55.870  82.490  28.470  1.00  0.00            
ATOM   3393  HG2 GLN B  94      55.510  81.750  30.070  1.00  0.00            
ATOM   3394  CD  GLN B  94      56.240  80.360  28.600  1.00  0.00            
ATOM   3395  OE1 GLN B  94      56.630  79.530  29.410  1.00  0.00            
ATOM   3396  NE2 GLN B  94      56.370  80.130  27.280  1.00  0.00            
ATOM   3397 1HE2 GLN B  94      56.130  80.830  26.620  1.00  0.00            
ATOM   3398 2HE2 GLN B  94      56.920  79.350  26.990  1.00  0.00            
ATOM   3399  C   GLN B  94      52.900  83.650  28.680  1.00  0.00            
ATOM   3400  O   GLN B  94      52.620  83.890  27.500  1.00  0.00            
ATOM   3401  N   VAL B  95      53.250  84.630  29.530  1.00  0.00            
ATOM   3402  HN  VAL B  95      53.370  84.440  30.510  1.00  0.00            
ATOM   3403  CA  VAL B  95      53.580  86.000  29.130  1.00  0.00            
ATOM   3404  HA  VAL B  95      53.670  86.060  28.050  1.00  0.00            
ATOM   3405  CB  VAL B  95      52.580  87.060  29.610  1.00  0.00            
ATOM   3406  HB  VAL B  95      52.530  87.030  30.730  1.00  0.00            
ATOM   3407  CG1 VAL B  95      53.020  88.470  29.160  1.00  0.00            
ATOM   3408 1HG1 VAL B  95      52.260  89.220  29.480  1.00  0.00            
ATOM   3409 2HG1 VAL B  95      53.990  88.770  29.620  1.00  0.00            
ATOM   3410 3HG1 VAL B  95      53.110  88.520  28.060  1.00  0.00            
ATOM   3411  CG2 VAL B  95      51.180  86.750  29.050  1.00  0.00            
ATOM   3412 1HG2 VAL B  95      50.460  87.540  29.380  1.00  0.00            
ATOM   3413 2HG2 VAL B  95      51.200  86.740  27.940  1.00  0.00            
ATOM   3414 3HG2 VAL B  95      50.810  85.770  29.420  1.00  0.00            
ATOM   3415  C   VAL B  95      54.930  86.320  29.740  1.00  0.00            
ATOM   3416  O   VAL B  95      55.070  86.270  30.960  1.00  0.00            
ATOM   3417  N   GLU B  96      55.950  86.650  28.930  1.00  0.00            
ATOM   3418  HN  GLU B  96      55.850  86.630  27.930  1.00  0.00            
ATOM   3419  CA  GLU B  96      57.260  86.990  29.440  1.00  0.00            
ATOM   3420  HA  GLU B  96      57.200  87.130  30.510  1.00  0.00            
ATOM   3421  CB  GLU B  96      58.280  85.850  29.220  1.00  0.00            
ATOM   3422  HB1 GLU B  96      59.270  86.130  29.670  1.00  0.00            
ATOM   3423  HB2 GLU B  96      57.920  84.960  29.780  1.00  0.00            
ATOM   3424  CG  GLU B  96      58.500  85.410  27.760  1.00  0.00            
ATOM   3425  HG1 GLU B  96      57.540  85.140  27.280  1.00  0.00            
ATOM   3426  HG2 GLU B  96      59.000  86.220  27.180  1.00  0.00            
ATOM   3427  CD  GLU B  96      59.400  84.180  27.710  1.00  0.00            
ATOM   3428  OE1 GLU B  96      58.850  83.060  27.550  1.00  0.00            
ATOM   3429  OE2 GLU B  96      60.640  84.370  27.830  1.00  0.00            
ATOM   3430  C   GLU B  96      57.760  88.310  28.890  1.00  0.00            
ATOM   3431  O   GLU B  96      57.700  88.600  27.700  1.00  0.00            
ATOM   3432  N   VAL B  97      58.210  89.200  29.800  1.00  0.00            
ATOM   3433  HN  VAL B  97      58.190  88.960  30.780  1.00  0.00            
ATOM   3434  CA  VAL B  97      58.660  90.540  29.470  1.00  0.00            
ATOM   3435  HA  VAL B  97      58.740  90.650  28.400  1.00  0.00            
ATOM   3436  CB  VAL B  97      57.730  91.620  30.010  1.00  0.00            
ATOM   3437  HB  VAL B  97      57.710  91.570  31.130  1.00  0.00            
ATOM   3438  CG1 VAL B  97      58.210  93.020  29.570  1.00  0.00            
ATOM   3439 1HG1 VAL B  97      57.480  93.790  29.930  1.00  0.00            
ATOM   3440 2HG1 VAL B  97      59.200  93.280  30.000  1.00  0.00            
ATOM   3441 3HG1 VAL B  97      58.250  93.090  28.470  1.00  0.00            
ATOM   3442  CG2 VAL B  97      56.300  91.380  29.500  1.00  0.00            
ATOM   3443 1HG2 VAL B  97      55.630  92.200  29.840  1.00  0.00            
ATOM   3444 2HG2 VAL B  97      56.280  91.370  28.390  1.00  0.00            
ATOM   3445 3HG2 VAL B  97      55.890  90.420  29.870  1.00  0.00            
ATOM   3446  C   VAL B  97      60.050  90.750  30.060  1.00  0.00            
ATOM   3447  O   VAL B  97      60.260  90.700  31.270  1.00  0.00            
ATOM   3448  N   LYS B  98      61.060  91.030  29.210  1.00  0.00            
ATOM   3449  HN  LYS B  98      60.890  91.010  28.220  1.00  0.00            
ATOM   3450  CA  LYS B  98      62.380  91.370  29.690  1.00  0.00            
ATOM   3451  HA  LYS B  98      62.380  91.460  30.760  1.00  0.00            
ATOM   3452  CB  LYS B  98      63.430  90.290  29.310  1.00  0.00            
ATOM   3453  HB1 LYS B  98      63.030  89.290  29.620  1.00  0.00            
ATOM   3454  HB2 LYS B  98      63.560  90.270  28.210  1.00  0.00            
ATOM   3455  CG  LYS B  98      64.770  90.530  30.010  1.00  0.00            
ATOM   3456  HG1 LYS B  98      65.050  91.610  29.900  1.00  0.00            
ATOM   3457  HG2 LYS B  98      64.640  90.350  31.100  1.00  0.00            
ATOM   3458  CD  LYS B  98      65.970  89.720  29.480  1.00  0.00            
ATOM   3459  HD1 LYS B  98      65.770  88.630  29.570  1.00  0.00            
ATOM   3460  HD2 LYS B  98      66.100  89.980  28.410  1.00  0.00            
ATOM   3461  CE  LYS B  98      67.200  90.130  30.290  1.00  0.00            
ATOM   3462  HE1 LYS B  98      67.130  91.220  30.480  1.00  0.00            
ATOM   3463  HE2 LYS B  98      67.240  89.600  31.270  1.00  0.00            
ATOM   3464  NZ  LYS B  98      68.480  89.930  29.600  1.00  0.00            
ATOM   3465  HZ1 LYS B  98      69.250  90.400  30.130  1.00  0.00            
ATOM   3466  HZ2 LYS B  98      68.710  88.960  29.340  1.00  0.00            
ATOM   3467  HZ3 LYS B  98      68.450  90.550  28.730  1.00  0.00            
ATOM   3468  C   LYS B  98      62.820  92.710  29.130  1.00  0.00            
ATOM   3469  O   LYS B  98      62.860  92.920  27.920  1.00  0.00            
ATOM   3470  N   SER B  99      63.200  93.660  30.010  1.00  0.00            
ATOM   3471  HN  SER B  99      63.120  93.510  31.010  1.00  0.00            
ATOM   3472  CA  SER B  99      63.770  94.940  29.610  1.00  0.00            
ATOM   3473  HA  SER B  99      63.920  94.930  28.540  1.00  0.00            
ATOM   3474  CB  SER B  99      62.850  96.160  29.890  1.00  0.00            
ATOM   3475  HB1 SER B  99      63.280  97.060  29.410  1.00  0.00            
ATOM   3476  HB2 SER B  99      61.860  95.950  29.410  1.00  0.00            
ATOM   3477  OG  SER B  99      62.640  96.430  31.280  1.00  0.00            
ATOM   3478  HG1 SER B  99      61.780  96.870  31.360  1.00  0.00            
ATOM   3479  C   SER B  99      65.150  95.150  30.220  1.00  0.00            
ATOM   3480  O   SER B  99      65.350  95.040  31.430  1.00  0.00            
ATOM   3481  N   GLU B 100      66.160  95.440  29.390  1.00  0.00            
ATOM   3482  HN  GLU B 100      66.030  95.430  28.400  1.00  0.00            
ATOM   3483  CA  GLU B 100      67.510  95.710  29.880  1.00  0.00            
ATOM   3484  HA  GLU B 100      67.470  95.860  30.950  1.00  0.00            
ATOM   3485  CB  GLU B 100      68.450  94.490  29.690  1.00  0.00            
ATOM   3486  HB1 GLU B 100      69.450  94.690  30.140  1.00  0.00            
ATOM   3487  HB2 GLU B 100      68.000  93.660  30.280  1.00  0.00            
ATOM   3488  CG  GLU B 100      68.660  93.960  28.250  1.00  0.00            
ATOM   3489  HG1 GLU B 100      67.700  94.030  27.680  1.00  0.00            
ATOM   3490  HG2 GLU B 100      69.440  94.550  27.720  1.00  0.00            
ATOM   3491  CD  GLU B 100      69.070  92.490  28.240  1.00  0.00            
ATOM   3492  OE1 GLU B 100      68.330  91.660  27.640  1.00  0.00            
ATOM   3493  OE2 GLU B 100      70.050  92.100  28.910  1.00  0.00            
ATOM   3494  C   GLU B 100      68.040  97.020  29.320  1.00  0.00            
ATOM   3495  O   GLU B 100      68.060  97.260  28.120  1.00  0.00            
ATOM   3496  N   LYS B 101      68.420  97.950  30.220  1.00  0.00            
ATOM   3497  HN  LYS B 101      68.370  97.740  31.210  1.00  0.00            
ATOM   3498  CA  LYS B 101      68.910  99.270  29.850  1.00  0.00            
ATOM   3499  HA  LYS B 101      69.040  99.320  28.790  1.00  0.00            
ATOM   3500  CB  LYS B 101      67.950 100.420  30.290  1.00  0.00            
ATOM   3501  HB1 LYS B 101      66.920 100.180  29.940  1.00  0.00            
ATOM   3502  HB2 LYS B 101      67.920 100.460  31.400  1.00  0.00            
ATOM   3503  CG  LYS B 101      68.390 101.780  29.710  1.00  0.00            
ATOM   3504  HG1 LYS B 101      69.500 101.840  29.800  1.00  0.00            
ATOM   3505  HG2 LYS B 101      68.170 101.790  28.620  1.00  0.00            
ATOM   3506  CD  LYS B 101      67.850 103.050  30.390  1.00  0.00            
ATOM   3507  HD1 LYS B 101      66.770 103.160  30.210  1.00  0.00            
ATOM   3508  HD2 LYS B 101      68.030 102.940  31.490  1.00  0.00            
ATOM   3509  CE  LYS B 101      68.640 104.250  29.860  1.00  0.00            
ATOM   3510  HE1 LYS B 101      69.700 103.920  29.720  1.00  0.00            
ATOM   3511  HE2 LYS B 101      68.270 104.570  28.860  1.00  0.00            
ATOM   3512  NZ  LYS B 101      68.700 105.430  30.760  1.00  0.00            
ATOM   3513  HZ1 LYS B 101      69.580 105.940  30.400  1.00  0.00            
ATOM   3514  HZ2 LYS B 101      67.900 106.070  30.740  1.00  0.00            
ATOM   3515  HZ3 LYS B 101      69.020 105.180  31.710  1.00  0.00            
ATOM   3516  C   LYS B 101      70.260  99.530  30.500  1.00  0.00            
ATOM   3517  O   LYS B 101      70.350  99.640  31.720  1.00  0.00            
ATOM   3518  N   LEU B 102      71.330  99.720  29.710  1.00  0.00            
ATOM   3519  HN  LEU B 102      71.250  99.660  28.710  1.00  0.00            
ATOM   3520  CA  LEU B 102      72.630 100.060  30.250  1.00  0.00            
ATOM   3521  HA  LEU B 102      72.580 100.150  31.330  1.00  0.00            
ATOM   3522  CB  LEU B 102      73.730  99.000  29.920  1.00  0.00            
ATOM   3523  HB1 LEU B 102      74.020  99.110  28.850  1.00  0.00            
ATOM   3524  HB2 LEU B 102      74.630  99.230  30.540  1.00  0.00            
ATOM   3525  CG  LEU B 102      73.340  97.520  30.150  1.00  0.00            
ATOM   3526  HG  LEU B 102      72.520  97.260  29.440  1.00  0.00            
ATOM   3527  CD1 LEU B 102      74.540  96.600  29.900  1.00  0.00            
ATOM   3528 1HD1 LEU B 102      74.240  95.540  30.040  1.00  0.00            
ATOM   3529 2HD1 LEU B 102      74.930  96.720  28.870  1.00  0.00            
ATOM   3530 3HD1 LEU B 102      75.360  96.840  30.620  1.00  0.00            
ATOM   3531  CD2 LEU B 102      72.820  97.230  31.560  1.00  0.00            
ATOM   3532 1HD2 LEU B 102      72.580  96.150  31.680  1.00  0.00            
ATOM   3533 2HD2 LEU B 102      73.610  97.510  32.280  1.00  0.00            
ATOM   3534 3HD2 LEU B 102      71.900  97.800  31.800  1.00  0.00            
ATOM   3535  C   LEU B 102      73.070 101.410  29.720  1.00  0.00            
ATOM   3536  O   LEU B 102      72.990 101.650  28.520  1.00  0.00            
ATOM   3537  N   ASP B 103      73.500 102.320  30.610  1.00  0.00            
ATOM   3538  HN  ASP B 103      73.510 102.120  31.600  1.00  0.00            
ATOM   3539  CA  ASP B 103      73.970 103.650  30.290  1.00  0.00            
ATOM   3540  HA  ASP B 103      74.000 103.790  29.220  1.00  0.00            
ATOM   3541  CB  ASP B 103      73.050 104.710  30.980  1.00  0.00            
ATOM   3542  HB1 ASP B 103      72.320 104.220  31.650  1.00  0.00            
ATOM   3543  HB2 ASP B 103      73.650 105.420  31.600  1.00  0.00            
ATOM   3544  CG  ASP B 103      72.330 105.560  29.970  1.00  0.00            
ATOM   3545  OD1 ASP B 103      71.100 105.810  30.140  1.00  0.00            
ATOM   3546  OD2 ASP B 103      72.970 105.950  28.970  1.00  0.00            
ATOM   3547  C   ASP B 103      75.400 103.810  30.800  1.00  0.00            
ATOM   3548  O   ASP B 103      75.770 103.320  31.870  1.00  0.00            
ATOM   3549  N   PHE B 104      76.280 104.480  30.020  1.00  0.00            
ATOM   3550  HN  PHE B 104      75.970 104.860  29.150  1.00  0.00            
ATOM   3551  CA  PHE B 104      77.630 104.760  30.460  1.00  0.00            
ATOM   3552  HA  PHE B 104      77.600 104.920  31.530  1.00  0.00            
ATOM   3553  CB  PHE B 104      78.570 103.540  30.160  1.00  0.00            
ATOM   3554  HB1 PHE B 104      78.110 102.650  30.650  1.00  0.00            
ATOM   3555  HB2 PHE B 104      78.570 103.360  29.070  1.00  0.00            
ATOM   3556  CG  PHE B 104      80.010 103.600  30.650  1.00  0.00            
ATOM   3557  CD1 PHE B 104      80.950 102.750  30.050  1.00  0.00            
ATOM   3558  HD1 PHE B 104      80.630 102.100  29.240  1.00  0.00            
ATOM   3559  CE1 PHE B 104      82.290 102.720  30.470  1.00  0.00            
ATOM   3560  HE1 PHE B 104      82.990 102.050  29.990  1.00  0.00            
ATOM   3561  CZ  PHE B 104      82.710 103.560  31.510  1.00  0.00            
ATOM   3562  HZ  PHE B 104      83.730 103.530  31.850  1.00  0.00            
ATOM   3563  CD2 PHE B 104      80.450 104.410  31.720  1.00  0.00            
ATOM   3564  HD2 PHE B 104      79.750 105.030  32.240  1.00  0.00            
ATOM   3565  CE2 PHE B 104      81.790 104.410  32.130  1.00  0.00            
ATOM   3566  HE2 PHE B 104      82.080 105.020  32.970  1.00  0.00            
ATOM   3567  C   PHE B 104      78.160 106.050  29.850  1.00  0.00            
ATOM   3568  O   PHE B 104      78.170 106.250  28.630  1.00  0.00            
ATOM   3569  N   LYS B 105      78.670 106.970  30.680  1.00  0.00            
ATOM   3570  HN  LYS B 105      78.530 106.840  31.670  1.00  0.00            
ATOM   3571  CA  LYS B 105      79.290 108.220  30.260  1.00  0.00            
ATOM   3572  HA  LYS B 105      79.510 108.730  31.180  1.00  0.00            
ATOM   3573  CB  LYS B 105      80.680 108.050  29.560  1.00  0.00            
ATOM   3574  HB1 LYS B 105      81.260 107.290  30.120  1.00  0.00            
ATOM   3575  HB2 LYS B 105      80.500 107.650  28.540  1.00  0.00            
ATOM   3576  CG  LYS B 105      81.460 109.380  29.490  1.00  0.00            
ATOM   3577  HG1 LYS B 105      80.750 110.170  29.130  1.00  0.00            
ATOM   3578  HG2 LYS B 105      81.750 109.690  30.510  1.00  0.00            
ATOM   3579  CD  LYS B 105      82.630 109.380  28.500  1.00  0.00            
ATOM   3580  HD1 LYS B 105      83.520 108.880  28.960  1.00  0.00            
ATOM   3581  HD2 LYS B 105      82.310 108.760  27.640  1.00  0.00            
ATOM   3582  CE  LYS B 105      82.930 110.800  28.010  1.00  0.00            
ATOM   3583  HE1 LYS B 105      82.010 111.240  27.550  1.00  0.00            
ATOM   3584  HE2 LYS B 105      83.260 111.450  28.840  1.00  0.00            
ATOM   3585  NZ  LYS B 105      83.990 110.770  26.980  1.00  0.00            
ATOM   3586  HZ1 LYS B 105      84.180 111.730  26.640  1.00  0.00            
ATOM   3587  HZ2 LYS B 105      84.870 110.350  27.360  1.00  0.00            
ATOM   3588  HZ3 LYS B 105      83.650 110.180  26.190  1.00  0.00            
ATOM   3589  C   LYS B 105      78.390 109.190  29.500  1.00  0.00            
ATOM   3590  O   LYS B 105      78.670 109.540  28.350  1.00  0.00            
ATOM   3591  N   ASP B 106      77.330 109.680  30.140  1.00  0.00            
ATOM   3592  HN  ASP B 106      77.050 109.360  31.040  1.00  0.00            
ATOM   3593  CA  ASP B 106      76.570 110.810  29.650  1.00  0.00            
ATOM   3594  HA  ASP B 106      76.570 110.780  28.570  1.00  0.00            
ATOM   3595  CB  ASP B 106      75.080 110.700  30.120  1.00  0.00            
ATOM   3596  HB1 ASP B 106      74.740 109.650  29.990  1.00  0.00            
ATOM   3597  HB2 ASP B 106      74.980 110.960  31.190  1.00  0.00            
ATOM   3598  CG  ASP B 106      74.090 111.570  29.330  1.00  0.00            
ATOM   3599  OD1 ASP B 106      72.870 111.500  29.630  1.00  0.00            
ATOM   3600  OD2 ASP B 106      74.540 112.330  28.430  1.00  0.00            
ATOM   3601  C   ASP B 106      77.260 112.130  30.070  1.00  0.00            
ATOM   3602  O   ASP B 106      78.310 112.180  30.730  1.00  0.00            
ATOM   3603  N   ARG B 107      76.650 113.240  29.610  1.00  0.00            
ATOM   3604  HN  ARG B 107      75.840 113.030  29.030  1.00  0.00            
ATOM   3605  CA  ARG B 107      76.760 114.580  30.100  1.00  0.00            
ATOM   3606  HA  ARG B 107      76.390 114.560  31.110  1.00  0.00            
ATOM   3607  CB  ARG B 107      78.190 115.200  30.040  1.00  0.00            
ATOM   3608  HB1 ARG B 107      78.870 114.530  30.610  1.00  0.00            
ATOM   3609  HB2 ARG B 107      78.520 115.200  28.980  1.00  0.00            
ATOM   3610  CG  ARG B 107      78.270 116.620  30.650  1.00  0.00            
ATOM   3611  HG1 ARG B 107      77.420 117.220  30.270  1.00  0.00            
ATOM   3612  HG2 ARG B 107      78.130 116.510  31.750  1.00  0.00            
ATOM   3613  CD  ARG B 107      79.570 117.370  30.370  1.00  0.00            
ATOM   3614  HD1 ARG B 107      80.430 116.810  30.800  1.00  0.00            
ATOM   3615  HD2 ARG B 107      79.700 117.500  29.270  1.00  0.00            
ATOM   3616  NE  ARG B 107      79.410 118.700  31.040  1.00  0.00            
ATOM   3617  HE  ARG B 107      78.520 118.890  31.450  1.00  0.00            
ATOM   3618  CZ  ARG B 107      80.330 119.680  31.020  1.00  0.00            
ATOM   3619  NH1 ARG B 107      81.520 119.510  30.450  1.00  0.00            
ATOM   3620 1HH1 ARG B 107      81.700 118.640  30.020  1.00  0.00            
ATOM   3621 2HH1 ARG B 107      82.180 120.240  30.450  1.00  0.00            
ATOM   3622  NH2 ARG B 107      80.050 120.860  31.590  1.00  0.00            
ATOM   3623 1HH2 ARG B 107      79.130 121.030  31.930  1.00  0.00            
ATOM   3624 2HH2 ARG B 107      80.690 121.610  31.490  1.00  0.00            
ATOM   3625  C   ARG B 107      75.820 115.470  29.280  1.00  0.00            
ATOM   3626  O   ARG B 107      76.210 115.960  28.220  1.00  0.00            
ATOM   3627  N   VAL B 108      74.620 115.750  29.830  1.00  0.00            
ATOM   3628  HN  VAL B 108      74.330 115.130  30.560  1.00  0.00            
ATOM   3629  CA  VAL B 108      73.660 116.830  29.540  1.00  0.00            
ATOM   3630  HA  VAL B 108      73.840 117.520  30.330  1.00  0.00            
ATOM   3631  CB  VAL B 108      73.860 117.770  28.330  1.00  0.00            
ATOM   3632  HB  VAL B 108      74.010 117.140  27.440  1.00  0.00            
ATOM   3633  CG1 VAL B 108      72.670 118.750  28.130  1.00  0.00            
ATOM   3634 1HG1 VAL B 108      72.890 119.440  27.290  1.00  0.00            
ATOM   3635 2HG1 VAL B 108      71.730 118.220  27.880  1.00  0.00            
ATOM   3636 3HG1 VAL B 108      72.510 119.350  29.050  1.00  0.00            
ATOM   3637  CG2 VAL B 108      75.080 118.710  28.550  1.00  0.00            
ATOM   3638 1HG2 VAL B 108      75.210 119.350  27.660  1.00  0.00            
ATOM   3639 2HG2 VAL B 108      74.900 119.350  29.430  1.00  0.00            
ATOM   3640 3HG2 VAL B 108      76.010 118.150  28.720  1.00  0.00            
ATOM   3641  C   VAL B 108      72.230 116.380  29.840  1.00  0.00            
ATOM   3642  O   VAL B 108      71.850 116.450  31.000  1.00  0.00            
ATOM   3643  N   GLN B 109      71.360 115.980  28.900  1.00  0.00            
ATOM   3644  HN  GLN B 109      71.640 115.850  27.940  1.00  0.00            
ATOM   3645  CA  GLN B 109      69.950 115.780  29.210  1.00  0.00            
ATOM   3646  HA  GLN B 109      69.790 115.760  30.280  1.00  0.00            
ATOM   3647  CB  GLN B 109      69.080 116.920  28.600  1.00  0.00            
ATOM   3648  HB1 GLN B 109      69.480 117.880  29.000  1.00  0.00            
ATOM   3649  HB2 GLN B 109      69.250 116.910  27.500  1.00  0.00            
ATOM   3650  CG  GLN B 109      67.560 116.830  28.910  1.00  0.00            
ATOM   3651  HG1 GLN B 109      67.180 115.820  28.660  1.00  0.00            
ATOM   3652  HG2 GLN B 109      67.380 117.000  29.990  1.00  0.00            
ATOM   3653  CD  GLN B 109      66.690 117.810  28.120  1.00  0.00            
ATOM   3654  OE1 GLN B 109      65.470 117.650  28.020  1.00  0.00            
ATOM   3655  NE2 GLN B 109      67.300 118.870  27.540  1.00  0.00            
ATOM   3656 1HE2 GLN B 109      68.290 118.960  27.620  1.00  0.00            
ATOM   3657 2HE2 GLN B 109      66.730 119.500  27.020  1.00  0.00            
ATOM   3658  C   GLN B 109      69.450 114.450  28.700  1.00  0.00            
ATOM   3659  O   GLN B 109      69.240 114.290  27.490  1.00  0.00            
ATOM   3660  N   SER B 110      69.140 113.510  29.610  1.00  0.00            
ATOM   3661  HN  SER B 110      69.330 113.660  30.590  1.00  0.00            
ATOM   3662  CA  SER B 110      68.600 112.210  29.250  1.00  0.00            
ATOM   3663  HA  SER B 110      68.600 112.130  28.180  1.00  0.00            
ATOM   3664  CB  SER B 110      69.490 111.020  29.750  1.00  0.00            
ATOM   3665  HB1 SER B 110      69.330 110.150  29.070  1.00  0.00            
ATOM   3666  HB2 SER B 110      70.550 111.330  29.640  1.00  0.00            
ATOM   3667  OG  SER B 110      69.260 110.590  31.090  1.00  0.00            
ATOM   3668  HG1 SER B 110      70.160 110.450  31.440  1.00  0.00            
ATOM   3669  C   SER B 110      67.160 112.110  29.700  1.00  0.00            
ATOM   3670  O   SER B 110      66.790 112.310  30.860  1.00  0.00            
ATOM   3671  N   LYS B 111      66.240 111.830  28.760  1.00  0.00            
ATOM   3672  HN  LYS B 111      66.530 111.780  27.790  1.00  0.00            
ATOM   3673  CA  LYS B 111      64.840 111.690  29.070  1.00  0.00            
ATOM   3674  HA  LYS B 111      64.680 111.690  30.140  1.00  0.00            
ATOM   3675  CB  LYS B 111      64.010 112.840  28.450  1.00  0.00            
ATOM   3676  HB1 LYS B 111      64.360 113.790  28.910  1.00  0.00            
ATOM   3677  HB2 LYS B 111      64.260 112.900  27.360  1.00  0.00            
ATOM   3678  CG  LYS B 111      62.480 112.700  28.620  1.00  0.00            
ATOM   3679  HG1 LYS B 111      62.160 111.720  28.180  1.00  0.00            
ATOM   3680  HG2 LYS B 111      62.250 112.660  29.710  1.00  0.00            
ATOM   3681  CD  LYS B 111      61.710 113.820  27.920  1.00  0.00            
ATOM   3682  HD1 LYS B 111      61.940 114.780  28.430  1.00  0.00            
ATOM   3683  HD2 LYS B 111      62.110 113.890  26.880  1.00  0.00            
ATOM   3684  CE  LYS B 111      60.200 113.540  27.870  1.00  0.00            
ATOM   3685  HE1 LYS B 111      60.000 112.580  27.350  1.00  0.00            
ATOM   3686  HE2 LYS B 111      59.780 113.480  28.900  1.00  0.00            
ATOM   3687  NZ  LYS B 111      59.510 114.620  27.140  1.00  0.00            
ATOM   3688  HZ1 LYS B 111      58.480 114.440  27.100  1.00  0.00            
ATOM   3689  HZ2 LYS B 111      59.690 115.540  27.590  1.00  0.00            
ATOM   3690  HZ3 LYS B 111      59.890 114.660  26.180  1.00  0.00            
ATOM   3691  C   LYS B 111      64.320 110.360  28.560  1.00  0.00            
ATOM   3692  O   LYS B 111      64.200 110.140  27.360  1.00  0.00            
ATOM   3693  N   ILE B 112      63.930 109.470  29.480  1.00  0.00            
ATOM   3694  HN  ILE B 112      64.050 109.670  30.460  1.00  0.00            
ATOM   3695  CA  ILE B 112      63.330 108.180  29.180  1.00  0.00            
ATOM   3696  HA  ILE B 112      63.330 108.050  28.110  1.00  0.00            
ATOM   3697  CB  ILE B 112      64.100 106.960  29.770  1.00  0.00            
ATOM   3698  HB  ILE B 112      64.490 106.390  28.900  1.00  0.00            
ATOM   3699  CG2 ILE B 112      65.340 107.430  30.580  1.00  0.00            
ATOM   3700 1HG2 ILE B 112      65.930 106.570  30.930  1.00  0.00            
ATOM   3701 2HG2 ILE B 112      66.010 108.070  29.960  1.00  0.00            
ATOM   3702 3HG2 ILE B 112      65.030 108.010  31.470  1.00  0.00            
ATOM   3703  CG1 ILE B 112      63.220 105.960  30.580  1.00  0.00            
ATOM   3704 1HG1 ILE B 112      62.780 106.480  31.450  1.00  0.00            
ATOM   3705 2HG1 ILE B 112      62.380 105.610  29.940  1.00  0.00            
ATOM   3706  CD  ILE B 112      63.970 104.710  31.080  1.00  0.00            
ATOM   3707  HD1 ILE B 112      63.250 104.030  31.580  1.00  0.00            
ATOM   3708  HD2 ILE B 112      64.440 104.170  30.240  1.00  0.00            
ATOM   3709  HD3 ILE B 112      64.750 104.980  31.830  1.00  0.00            
ATOM   3710  C   ILE B 112      61.870 108.220  29.590  1.00  0.00            
ATOM   3711  O   ILE B 112      61.510 108.640  30.690  1.00  0.00            
ATOM   3712  N   GLY B 113      60.980 107.790  28.680  1.00  0.00            
ATOM   3713  HN  GLY B 113      61.260 107.610  27.730  1.00  0.00            
ATOM   3714  CA  GLY B 113      59.600 107.460  28.980  1.00  0.00            
ATOM   3715  HA1 GLY B 113      59.450 107.370  30.050  1.00  0.00            
ATOM   3716  HA2 GLY B 113      58.970 108.210  28.520  1.00  0.00            
ATOM   3717  C   GLY B 113      59.260 106.140  28.340  1.00  0.00            
ATOM   3718  O   GLY B 113      59.340 106.010  27.130  1.00  0.00            
ATOM   3719  N   SER B 114      58.870 105.130  29.130  1.00  0.00            
ATOM   3720  HN  SER B 114      58.880 105.200  30.130  1.00  0.00            
ATOM   3721  CA  SER B 114      58.440 103.830  28.610  1.00  0.00            
ATOM   3722  HA  SER B 114      58.380 103.860  27.530  1.00  0.00            
ATOM   3723  CB  SER B 114      59.390 102.650  28.990  1.00  0.00            
ATOM   3724  HB1 SER B 114      58.870 101.680  28.830  1.00  0.00            
ATOM   3725  HB2 SER B 114      60.270 102.700  28.310  1.00  0.00            
ATOM   3726  OG  SER B 114      59.870 102.740  30.340  1.00  0.00            
ATOM   3727  HG1 SER B 114      60.160 101.850  30.580  1.00  0.00            
ATOM   3728  C   SER B 114      57.050 103.520  29.110  1.00  0.00            
ATOM   3729  O   SER B 114      56.800 103.550  30.310  1.00  0.00            
ATOM   3730  N   LEU B 115      56.100 103.240  28.200  1.00  0.00            
ATOM   3731  HN  LEU B 115      56.300 103.220  27.210  1.00  0.00            
ATOM   3732  CA  LEU B 115      54.700 103.000  28.540  1.00  0.00            
ATOM   3733  HA  LEU B 115      54.580 103.000  29.620  1.00  0.00            
ATOM   3734  CB  LEU B 115      53.720 104.030  27.910  1.00  0.00            
ATOM   3735  HB1 LEU B 115      53.620 103.820  26.820  1.00  0.00            
ATOM   3736  HB2 LEU B 115      52.720 103.850  28.360  1.00  0.00            
ATOM   3737  CG  LEU B 115      54.050 105.540  28.050  1.00  0.00            
ATOM   3738  HG  LEU B 115      54.870 105.780  27.340  1.00  0.00            
ATOM   3739  CD1 LEU B 115      52.800 106.380  27.720  1.00  0.00            
ATOM   3740 1HD1 LEU B 115      53.040 107.460  27.800  1.00  0.00            
ATOM   3741 2HD1 LEU B 115      52.420 106.170  26.700  1.00  0.00            
ATOM   3742 3HD1 LEU B 115      51.990 106.140  28.440  1.00  0.00            
ATOM   3743  CD2 LEU B 115      54.500 105.940  29.450  1.00  0.00            
ATOM   3744 1HD2 LEU B 115      54.560 107.040  29.550  1.00  0.00            
ATOM   3745 2HD2 LEU B 115      53.760 105.540  30.160  1.00  0.00            
ATOM   3746 3HD2 LEU B 115      55.490 105.520  29.700  1.00  0.00            
ATOM   3747  C   LEU B 115      54.270 101.630  28.030  1.00  0.00            
ATOM   3748  O   LEU B 115      54.350 101.370  26.830  1.00  0.00            
ATOM   3749  N   ASP B 116      53.780 100.750  28.930  1.00  0.00            
ATOM   3750  HN  ASP B 116      53.790 100.940  29.910  1.00  0.00            
ATOM   3751  CA  ASP B 116      53.290  99.420  28.590  1.00  0.00            
ATOM   3752  HA  ASP B 116      53.410  99.240  27.530  1.00  0.00            
ATOM   3753  CB  ASP B 116      54.100  98.370  29.400  1.00  0.00            
ATOM   3754  HB1 ASP B 116      55.160  98.690  29.480  1.00  0.00            
ATOM   3755  HB2 ASP B 116      53.700  98.230  30.420  1.00  0.00            
ATOM   3756  CG  ASP B 116      54.100  97.030  28.690  1.00  0.00            
ATOM   3757  OD1 ASP B 116      55.210  96.500  28.440  1.00  0.00            
ATOM   3758  OD2 ASP B 116      52.980  96.570  28.340  1.00  0.00            
ATOM   3759  C   ASP B 116      51.800  99.330  28.920  1.00  0.00            
ATOM   3760  O   ASP B 116      51.350  99.790  29.970  1.00  0.00            
ATOM   3761  N   ASN B 117      50.970  98.790  28.000  1.00  0.00            
ATOM   3762  HN  ASN B 117      51.380  98.360  27.200  1.00  0.00            
ATOM   3763  CA  ASN B 117      49.540  98.610  28.220  1.00  0.00            
ATOM   3764  HA  ASN B 117      49.330  98.620  29.280  1.00  0.00            
ATOM   3765  CB  ASN B 117      48.670  99.670  27.460  1.00  0.00            
ATOM   3766  HB1 ASN B 117      48.920  99.620  26.380  1.00  0.00            
ATOM   3767  HB2 ASN B 117      47.600  99.420  27.580  1.00  0.00            
ATOM   3768  CG  ASN B 117      48.830 101.130  27.890  1.00  0.00            
ATOM   3769  OD1 ASN B 117      48.530 102.050  27.130  1.00  0.00            
ATOM   3770  ND2 ASN B 117      49.210 101.380  29.160  1.00  0.00            
ATOM   3771 1HD2 ASN B 117      49.710 100.670  29.670  1.00  0.00            
ATOM   3772 2HD2 ASN B 117      49.170 102.310  29.500  1.00  0.00            
ATOM   3773  C   ASN B 117      49.090  97.250  27.710  1.00  0.00            
ATOM   3774  O   ASN B 117      49.000  97.020  26.500  1.00  0.00            
ATOM   3775  N   ILE B 118      48.690  96.330  28.620  1.00  0.00            
ATOM   3776  HN  ILE B 118      48.810  96.520  29.600  1.00  0.00            
ATOM   3777  CA  ILE B 118      48.260  94.980  28.280  1.00  0.00            
ATOM   3778  HA  ILE B 118      48.380  94.810  27.220  1.00  0.00            
ATOM   3779  CB  ILE B 118      49.060  93.920  29.030  1.00  0.00            
ATOM   3780  HB  ILE B 118      48.900  94.050  30.130  1.00  0.00            
ATOM   3781  CG2 ILE B 118      48.580  92.500  28.640  1.00  0.00            
ATOM   3782 1HG2 ILE B 118      49.160  91.730  29.190  1.00  0.00            
ATOM   3783 2HG2 ILE B 118      47.510  92.330  28.900  1.00  0.00            
ATOM   3784 3HG2 ILE B 118      48.720  92.330  27.550  1.00  0.00            
ATOM   3785  CG1 ILE B 118      50.580  94.110  28.790  1.00  0.00            
ATOM   3786 1HG1 ILE B 118      50.790  94.060  27.700  1.00  0.00            
ATOM   3787 2HG1 ILE B 118      50.890  95.130  29.120  1.00  0.00            
ATOM   3788  CD  ILE B 118      51.480  93.110  29.530  1.00  0.00            
ATOM   3789  HD1 ILE B 118      52.540  93.370  29.340  1.00  0.00            
ATOM   3790  HD2 ILE B 118      51.300  93.160  30.620  1.00  0.00            
ATOM   3791  HD3 ILE B 118      51.310  92.070  29.180  1.00  0.00            
ATOM   3792  C   ILE B 118      46.790  94.810  28.620  1.00  0.00            
ATOM   3793  O   ILE B 118      46.390  94.930  29.770  1.00  0.00            
ATOM   3794  N   THR B 119      45.930  94.480  27.630  1.00  0.00            
ATOM   3795  HN  THR B 119      46.240  94.500  26.670  1.00  0.00            
ATOM   3796  CA  THR B 119      44.510  94.190  27.850  1.00  0.00            
ATOM   3797  HA  THR B 119      44.310  94.160  28.910  1.00  0.00            
ATOM   3798  CB  THR B 119      43.570  95.220  27.230  1.00  0.00            
ATOM   3799  HB  THR B 119      43.810  95.340  26.150  1.00  0.00            
ATOM   3800  OG1 THR B 119      43.710  96.480  27.880  1.00  0.00            
ATOM   3801  HG1 THR B 119      43.350  97.130  27.280  1.00  0.00            
ATOM   3802  CG2 THR B 119      42.080  94.850  27.410  1.00  0.00            
ATOM   3803 1HG2 THR B 119      41.440  95.640  26.980  1.00  0.00            
ATOM   3804 2HG2 THR B 119      41.830  93.900  26.900  1.00  0.00            
ATOM   3805 3HG2 THR B 119      41.840  94.750  28.490  1.00  0.00            
ATOM   3806  C   THR B 119      44.150  92.830  27.290  1.00  0.00            
ATOM   3807  O   THR B 119      44.190  92.580  26.080  1.00  0.00            
ATOM   3808  N   HSD B 120      43.720  91.900  28.160  1.00  0.00            
ATOM   3809  HN  HSD B 120      43.760  92.100  29.140  1.00  0.00            
ATOM   3810  CA  HSD B 120      43.080  90.650  27.770  1.00  0.00            
ATOM   3811  HA  HSD B 120      43.160  90.490  26.710  1.00  0.00            
ATOM   3812  CB  HSD B 120      43.660  89.430  28.550  1.00  0.00            
ATOM   3813  HB1 HSD B 120      43.520  89.600  29.640  1.00  0.00            
ATOM   3814  HB2 HSD B 120      43.110  88.510  28.280  1.00  0.00            
ATOM   3815  ND1 HSD B 120      45.840  88.290  29.120  1.00  0.00            
ATOM   3816  HD1 HSD B 120      45.540  87.850  29.960  1.00  0.00            
ATOM   3817  CG  HSD B 120      45.120  89.170  28.330  1.00  0.00            
ATOM   3818  CE1 HSD B 120      47.100  88.250  28.610  1.00  0.00            
ATOM   3819  HE1 HSD B 120      47.900  87.660  29.060  1.00  0.00            
ATOM   3820  NE2 HSD B 120      47.230  89.020  27.550  1.00  0.00            
ATOM   3821  CD2 HSD B 120      45.990  89.610  27.380  1.00  0.00            
ATOM   3822  HD2 HSD B 120      45.840  90.330  26.580  1.00  0.00            
ATOM   3823  C   HSD B 120      41.620  90.710  28.150  1.00  0.00            
ATOM   3824  O   HSD B 120      41.260  91.470  29.050  1.00  0.00            
ATOM   3825  N   VAL B 121      40.730  89.910  27.510  1.00  0.00            
ATOM   3826  HN  VAL B 121      40.970  89.380  26.700  1.00  0.00            
ATOM   3827  CA  VAL B 121      39.380  89.670  28.060  1.00  0.00            
ATOM   3828  HA  VAL B 121      39.210  90.430  28.800  1.00  0.00            
ATOM   3829  CB  VAL B 121      38.250  89.980  27.080  1.00  0.00            
ATOM   3830  HB  VAL B 121      38.160  89.180  26.320  1.00  0.00            
ATOM   3831  CG1 VAL B 121      36.910  90.200  27.820  1.00  0.00            
ATOM   3832 1HG1 VAL B 121      36.090  90.330  27.070  1.00  0.00            
ATOM   3833 2HG1 VAL B 121      36.640  89.370  28.490  1.00  0.00            
ATOM   3834 3HG1 VAL B 121      36.960  91.130  28.430  1.00  0.00            
ATOM   3835  CG2 VAL B 121      38.540  91.320  26.370  1.00  0.00            
ATOM   3836 1HG2 VAL B 121      37.730  91.560  25.650  1.00  0.00            
ATOM   3837 2HG2 VAL B 121      38.610  92.140  27.110  1.00  0.00            
ATOM   3838 3HG2 VAL B 121      39.500  91.290  25.810  1.00  0.00            
ATOM   3839  C   VAL B 121      39.410  88.350  28.870  1.00  0.00            
ATOM   3840  O   VAL B 121      40.330  88.300  29.690  1.00  0.00            
ATOM   3841  N   PRO B 122      38.570  87.280  28.900  1.00  0.00            
ATOM   3842  CD  PRO B 122      37.610  86.910  27.880  1.00  0.00            
ATOM   3843  HD1 PRO B 122      38.240  86.440  27.140  1.00  0.00            
ATOM   3844  HD2 PRO B 122      37.010  87.720  27.420  1.00  0.00            
ATOM   3845  CA  PRO B 122      38.900  86.070  29.630  1.00  0.00            
ATOM   3846  HA  PRO B 122      39.310  86.370  30.570  1.00  0.00            
ATOM   3847  CB  PRO B 122      37.510  85.370  29.670  1.00  0.00            
ATOM   3848  HB1 PRO B 122      37.530  84.290  29.840  1.00  0.00            
ATOM   3849  HB2 PRO B 122      36.910  85.830  30.480  1.00  0.00            
ATOM   3850  CG  PRO B 122      36.760  85.760  28.410  1.00  0.00            
ATOM   3851  HG1 PRO B 122      36.740  84.920  27.690  1.00  0.00            
ATOM   3852  HG2 PRO B 122      35.720  86.080  28.630  1.00  0.00            
ATOM   3853  C   PRO B 122      40.090  85.250  29.120  1.00  0.00            
ATOM   3854  O   PRO B 122      40.630  85.560  28.070  1.00  0.00            
ATOM   3855  N   GLY B 123      40.600  84.250  29.890  1.00  0.00            
ATOM   3856  HN  GLY B 123      41.540  84.010  29.690  1.00  0.00            
ATOM   3857  CA  GLY B 123      39.860  83.270  30.690  1.00  0.00            
ATOM   3858  HA1 GLY B 123      40.570  82.750  31.310  1.00  0.00            
ATOM   3859  HA2 GLY B 123      39.090  83.750  31.270  1.00  0.00            
ATOM   3860  C   GLY B 123      39.240  82.240  29.760  1.00  0.00            
ATOM   3861  O   GLY B 123      39.870  81.820  28.800  1.00  0.00            
ATOM   3862  N   GLY B 124      37.990  81.820  29.990  1.00  0.00            
ATOM   3863  HN  GLY B 124      37.480  82.110  30.800  1.00  0.00            
ATOM   3864  CA  GLY B 124      37.350  80.840  29.120  1.00  0.00            
ATOM   3865  HA1 GLY B 124      36.280  81.000  29.140  1.00  0.00            
ATOM   3866  HA2 GLY B 124      37.760  80.900  28.120  1.00  0.00            
ATOM   3867  C   GLY B 124      37.600  79.450  29.630  1.00  0.00            
ATOM   3868  O   GLY B 124      37.570  79.210  30.830  1.00  0.00            
ATOM   3869  N   GLY B 125      37.830  78.490  28.720  1.00  0.00            
ATOM   3870  HN  GLY B 125      37.820  78.720  27.740  1.00  0.00            
ATOM   3871  CA  GLY B 125      38.190  77.130  29.080  1.00  0.00            
ATOM   3872  HA1 GLY B 125      38.240  77.020  30.150  1.00  0.00            
ATOM   3873  HA2 GLY B 125      37.460  76.470  28.620  1.00  0.00            
ATOM   3874  C   GLY B 125      39.530  76.760  28.520  1.00  0.00            
ATOM   3875  O   GLY B 125      39.720  76.670  27.310  1.00  0.00            
ATOM   3876  N   ASN B 126      40.510  76.480  29.390  1.00  0.00            
ATOM   3877  HN  ASN B 126      40.340  76.570  30.370  1.00  0.00            
ATOM   3878  CA  ASN B 126      41.810  76.000  28.960  1.00  0.00            
ATOM   3879  HA  ASN B 126      41.860  75.930  27.880  1.00  0.00            
ATOM   3880  CB  ASN B 126      43.000  76.870  29.460  1.00  0.00            
ATOM   3881  HB1 ASN B 126      43.060  76.840  30.570  1.00  0.00            
ATOM   3882  HB2 ASN B 126      43.960  76.490  29.050  1.00  0.00            
ATOM   3883  CG  ASN B 126      42.890  78.340  29.070  1.00  0.00            
ATOM   3884  OD1 ASN B 126      43.300  79.210  29.850  1.00  0.00            
ATOM   3885  ND2 ASN B 126      42.380  78.660  27.870  1.00  0.00            
ATOM   3886 1HD2 ASN B 126      42.000  77.960  27.270  1.00  0.00            
ATOM   3887 2HD2 ASN B 126      42.390  79.620  27.590  1.00  0.00            
ATOM   3888  C   ASN B 126      41.990  74.600  29.510  1.00  0.00            
ATOM   3889  O   ASN B 126      41.970  74.370  30.720  1.00  0.00            
ATOM   3890  N   LYS B 127      42.150  73.600  28.630  1.00  0.00            
ATOM   3891  HN  LYS B 127      42.160  73.790  27.640  1.00  0.00            
ATOM   3892  CA  LYS B 127      42.300  72.220  29.040  1.00  0.00            
ATOM   3893  HA  LYS B 127      42.420  72.170  30.110  1.00  0.00            
ATOM   3894  CB  LYS B 127      41.050  71.390  28.660  1.00  0.00            
ATOM   3895  HB1 LYS B 127      40.160  71.900  29.080  1.00  0.00            
ATOM   3896  HB2 LYS B 127      40.940  71.390  27.550  1.00  0.00            
ATOM   3897  CG  LYS B 127      41.100  69.940  29.190  1.00  0.00            
ATOM   3898  HG1 LYS B 127      42.010  69.440  28.770  1.00  0.00            
ATOM   3899  HG2 LYS B 127      41.230  69.970  30.290  1.00  0.00            
ATOM   3900  CD  LYS B 127      39.870  69.110  28.810  1.00  0.00            
ATOM   3901  HD1 LYS B 127      38.980  69.550  29.310  1.00  0.00            
ATOM   3902  HD2 LYS B 127      39.720  69.210  27.700  1.00  0.00            
ATOM   3903  CE  LYS B 127      40.050  67.640  29.180  1.00  0.00            
ATOM   3904  HE1 LYS B 127      40.960  67.240  28.670  1.00  0.00            
ATOM   3905  HE2 LYS B 127      40.190  67.540  30.280  1.00  0.00            
ATOM   3906  NZ  LYS B 127      38.890  66.820  28.770  1.00  0.00            
ATOM   3907  HZ1 LYS B 127      39.040  65.820  29.020  1.00  0.00            
ATOM   3908  HZ2 LYS B 127      38.010  67.170  29.210  1.00  0.00            
ATOM   3909  HZ3 LYS B 127      38.780  66.890  27.740  1.00  0.00            
ATOM   3910  C   LYS B 127      43.540  71.600  28.440  1.00  0.00            
ATOM   3911  O   LYS B 127      43.670  71.500  27.220  1.00  0.00            
ATOM   3912  N   LYS B 128      44.460  71.110  29.280  1.00  0.00            
ATOM   3913  HN  LYS B 128      44.350  71.210  30.280  1.00  0.00            
ATOM   3914  CA  LYS B 128      45.640  70.400  28.830  1.00  0.00            
ATOM   3915  HA  LYS B 128      45.650  70.330  27.750  1.00  0.00            
ATOM   3916  CB  LYS B 128      46.960  71.090  29.290  1.00  0.00            
ATOM   3917  HB1 LYS B 128      46.890  72.180  29.050  1.00  0.00            
ATOM   3918  HB2 LYS B 128      47.050  71.000  30.390  1.00  0.00            
ATOM   3919  CG  LYS B 128      48.180  70.490  28.580  1.00  0.00            
ATOM   3920  HG1 LYS B 128      47.990  69.400  28.510  1.00  0.00            
ATOM   3921  HG2 LYS B 128      48.240  70.860  27.540  1.00  0.00            
ATOM   3922  CD  LYS B 128      49.550  70.600  29.290  1.00  0.00            
ATOM   3923  HD1 LYS B 128      49.990  71.610  29.120  1.00  0.00            
ATOM   3924  HD2 LYS B 128      49.410  70.440  30.380  1.00  0.00            
ATOM   3925  CE  LYS B 128      50.430  69.480  28.710  1.00  0.00            
ATOM   3926  HE1 LYS B 128      49.760  68.600  28.560  1.00  0.00            
ATOM   3927  HE2 LYS B 128      50.840  69.770  27.720  1.00  0.00            
ATOM   3928  NZ  LYS B 128      51.520  68.960  29.550  1.00  0.00            
ATOM   3929  HZ1 LYS B 128      51.880  68.110  29.000  1.00  0.00            
ATOM   3930  HZ2 LYS B 128      52.300  69.620  29.710  1.00  0.00            
ATOM   3931  HZ3 LYS B 128      51.160  68.500  30.430  1.00  0.00            
ATOM   3932  C   LYS B 128      45.610  68.970  29.370  1.00  0.00            
ATOM   3933  O   LYS B 128      45.320  68.750  30.550  1.00  0.00            
ATOM   3934  N   ILE B 129      45.910  67.970  28.510  1.00  0.00            
ATOM   3935  HN  ILE B 129      46.020  68.150  27.530  1.00  0.00            
ATOM   3936  CA  ILE B 129      46.280  66.630  28.920  1.00  0.00            
ATOM   3937  HA  ILE B 129      46.440  66.610  29.980  1.00  0.00            
ATOM   3938  CB  ILE B 129      45.210  65.580  28.590  1.00  0.00            
ATOM   3939  HB  ILE B 129      45.100  65.520  27.480  1.00  0.00            
ATOM   3940  CG2 ILE B 129      45.660  64.200  29.130  1.00  0.00            
ATOM   3941 1HG2 ILE B 129      44.930  63.410  28.890  1.00  0.00            
ATOM   3942 2HG2 ILE B 129      46.630  63.890  28.670  1.00  0.00            
ATOM   3943 3HG2 ILE B 129      45.810  64.240  30.230  1.00  0.00            
ATOM   3944  CG1 ILE B 129      43.830  65.980  29.190  1.00  0.00            
ATOM   3945 1HG1 ILE B 129      43.950  66.050  30.300  1.00  0.00            
ATOM   3946 2HG1 ILE B 129      43.560  66.990  28.810  1.00  0.00            
ATOM   3947  CD  ILE B 129      42.700  65.000  28.850  1.00  0.00            
ATOM   3948  HD1 ILE B 129      41.750  65.320  29.310  1.00  0.00            
ATOM   3949  HD2 ILE B 129      42.580  64.920  27.750  1.00  0.00            
ATOM   3950  HD3 ILE B 129      42.930  63.990  29.240  1.00  0.00            
ATOM   3951  C   ILE B 129      47.610  66.290  28.220  1.00  0.00            
ATOM   3952  O   ILE B 129      47.640  66.340  27.000  1.00  0.00            
ATOM   3953  N   GLU B 130      48.710  65.980  28.940  1.00  0.00            
ATOM   3954  HN  GLU B 130      48.690  66.020  29.950  1.00  0.00            
ATOM   3955  CA  GLU B 130      49.950  65.450  28.360  1.00  0.00            
ATOM   3956  HA  GLU B 130      50.530  65.180  29.240  1.00  0.00            
ATOM   3957  CB  GLU B 130      49.690  64.070  27.640  1.00  0.00            
ATOM   3958  HB1 GLU B 130      48.760  63.660  28.110  1.00  0.00            
ATOM   3959  HB2 GLU B 130      49.460  64.250  26.570  1.00  0.00            
ATOM   3960  CG  GLU B 130      50.770  62.960  27.810  1.00  0.00            
ATOM   3961  HG1 GLU B 130      51.610  63.170  27.120  1.00  0.00            
ATOM   3962  HG2 GLU B 130      51.150  62.990  28.850  1.00  0.00            
ATOM   3963  CD  GLU B 130      50.320  61.510  27.570  1.00  0.00            
ATOM   3964  OE1 GLU B 130      51.200  60.630  27.310  1.00  0.00            
ATOM   3965  OE2 GLU B 130      49.120  61.140  27.710  1.00  0.00            
ATOM   3966  C   GLU B 130      50.860  66.520  27.630  1.00  0.00            
ATOM   3967  OT1 GLU B 130      50.440  67.240  26.670  1.00  0.00            
ATOM   3968  OT2 GLU B 130      52.000  66.780  28.140  1.00  0.00            
ATOM   3969  N   MET C   1      86.140  45.850  33.370  1.00  0.00            
ATOM   3970  H1  MET C   1      86.090  44.890  33.760  1.00  0.00            
ATOM   3971  H2  MET C   1      85.430  46.470  33.810  1.00  0.00            
ATOM   3972  H3  MET C   1      85.930  45.800  32.350  1.00  0.00            
ATOM   3973  CA  MET C   1      87.530  46.410  33.530  1.00  0.00            
ATOM   3974  HA  MET C   1      87.740  46.510  34.590  1.00  0.00            
ATOM   3975  CB  MET C   1      88.530  45.440  32.860  1.00  0.00            
ATOM   3976  HB1 MET C   1      88.280  45.320  31.780  1.00  0.00            
ATOM   3977  HB2 MET C   1      89.560  45.880  32.910  1.00  0.00            
ATOM   3978  CG  MET C   1      88.610  44.050  33.510  1.00  0.00            
ATOM   3979  HG1 MET C   1      89.060  44.140  34.520  1.00  0.00            
ATOM   3980  HG2 MET C   1      87.610  43.580  33.620  1.00  0.00            
ATOM   3981  SD  MET C   1      89.630  42.930  32.510  1.00  0.00            
ATOM   3982  CE  MET C   1      89.670  41.590  33.730  1.00  0.00            
ATOM   3983  HE1 MET C   1      90.230  40.720  33.340  1.00  0.00            
ATOM   3984  HE2 MET C   1      90.180  41.910  34.660  1.00  0.00            
ATOM   3985  HE3 MET C   1      88.650  41.240  33.990  1.00  0.00            
ATOM   3986  C   MET C   1      87.690  47.770  32.900  1.00  0.00            
ATOM   3987  O   MET C   1      87.120  48.010  31.830  1.00  0.00            
ATOM   3988  N   GLN C   2      88.460  48.680  33.540  1.00  0.00            
ATOM   3989  HN  GLN C   2      88.920  48.480  34.410  1.00  0.00            
ATOM   3990  CA  GLN C   2      88.890  49.950  33.000  1.00  0.00            
ATOM   3991  HA  GLN C   2      88.950  49.900  31.920  1.00  0.00            
ATOM   3992  CB  GLN C   2      88.030  51.150  33.480  1.00  0.00            
ATOM   3993  HB1 GLN C   2      88.190  51.290  34.570  1.00  0.00            
ATOM   3994  HB2 GLN C   2      88.410  52.070  32.960  1.00  0.00            
ATOM   3995  CG  GLN C   2      86.510  51.000  33.230  1.00  0.00            
ATOM   3996  HG1 GLN C   2      86.330  50.760  32.160  1.00  0.00            
ATOM   3997  HG2 GLN C   2      86.120  50.170  33.850  1.00  0.00            
ATOM   3998  CD  GLN C   2      85.710  52.260  33.580  1.00  0.00            
ATOM   3999  OE1 GLN C   2      84.550  52.410  33.150  1.00  0.00            
ATOM   4000  NE2 GLN C   2      86.280  53.160  34.410  1.00  0.00            
ATOM   4001 1HE2 GLN C   2      87.220  53.020  34.700  1.00  0.00            
ATOM   4002 2HE2 GLN C   2      85.870  54.060  34.520  1.00  0.00            
ATOM   4003  C   GLN C   2      90.280  50.180  33.550  1.00  0.00            
ATOM   4004  O   GLN C   2      90.460  50.030  34.760  1.00  0.00            
ATOM   4005  N   THR C   3      91.260  50.540  32.700  1.00  0.00            
ATOM   4006  HN  THR C   3      91.110  50.590  31.710  1.00  0.00            
ATOM   4007  CA  THR C   3      92.640  50.740  33.120  1.00  0.00            
ATOM   4008  HA  THR C   3      92.710  50.790  34.200  1.00  0.00            
ATOM   4009  CB  THR C   3      93.560  49.630  32.620  1.00  0.00            
ATOM   4010  HB  THR C   3      93.560  49.620  31.500  1.00  0.00            
ATOM   4011  OG1 THR C   3      93.110  48.370  33.090  1.00  0.00            
ATOM   4012  HG1 THR C   3      93.740  47.730  32.740  1.00  0.00            
ATOM   4013  CG2 THR C   3      94.990  49.810  33.140  1.00  0.00            
ATOM   4014 1HG2 THR C   3      95.640  48.970  32.790  1.00  0.00            
ATOM   4015 2HG2 THR C   3      95.440  50.750  32.770  1.00  0.00            
ATOM   4016 3HG2 THR C   3      95.000  49.810  34.250  1.00  0.00            
ATOM   4017  C   THR C   3      93.120  52.050  32.540  1.00  0.00            
ATOM   4018  O   THR C   3      93.110  52.220  31.320  1.00  0.00            
ATOM   4019  N   ALA C   4      93.550  53.020  33.380  1.00  0.00            
ATOM   4020  HN  ALA C   4      93.520  52.910  34.370  1.00  0.00            
ATOM   4021  CA  ALA C   4      93.950  54.330  32.870  1.00  0.00            
ATOM   4022  HA  ALA C   4      94.330  54.230  31.870  1.00  0.00            
ATOM   4023  CB  ALA C   4      92.720  55.260  32.820  1.00  0.00            
ATOM   4024  HB1 ALA C   4      93.010  56.250  32.410  1.00  0.00            
ATOM   4025  HB2 ALA C   4      91.950  54.830  32.150  1.00  0.00            
ATOM   4026  HB3 ALA C   4      92.290  55.410  33.830  1.00  0.00            
ATOM   4027  C   ALA C   4      95.040  55.000  33.710  1.00  0.00            
ATOM   4028  O   ALA C   4      94.730  55.570  34.750  1.00  0.00            
ATOM   4029  N   PRO C   5      96.320  54.970  33.330  1.00  0.00            
ATOM   4030  CD  PRO C   5      96.860  53.910  32.470  1.00  0.00            
ATOM   4031  HD1 PRO C   5      96.460  54.000  31.440  1.00  0.00            
ATOM   4032  HD2 PRO C   5      96.590  52.920  32.900  1.00  0.00            
ATOM   4033  CA  PRO C   5      97.360  55.640  34.100  1.00  0.00            
ATOM   4034  HA  PRO C   5      97.090  55.730  35.140  1.00  0.00            
ATOM   4035  CB  PRO C   5      98.590  54.730  33.890  1.00  0.00            
ATOM   4036  HB1 PRO C   5      99.550  55.270  33.980  1.00  0.00            
ATOM   4037  HB2 PRO C   5      98.570  53.910  34.640  1.00  0.00            
ATOM   4038  CG  PRO C   5      98.370  54.110  32.520  1.00  0.00            
ATOM   4039  HG1 PRO C   5      98.680  54.870  31.770  1.00  0.00            
ATOM   4040  HG2 PRO C   5      98.940  53.180  32.360  1.00  0.00            
ATOM   4041  C   PRO C   5      97.680  57.040  33.610  1.00  0.00            
ATOM   4042  O   PRO C   5      97.670  57.310  32.410  1.00  0.00            
ATOM   4043  N   VAL C   6      98.010  57.950  34.550  1.00  0.00            
ATOM   4044  HN  VAL C   6      97.920  57.700  35.520  1.00  0.00            
ATOM   4045  CA  VAL C   6      98.670  59.220  34.280  1.00  0.00            
ATOM   4046  HA  VAL C   6      98.450  59.490  33.270  1.00  0.00            
ATOM   4047  CB  VAL C   6      98.150  60.350  35.170  1.00  0.00            
ATOM   4048  HB  VAL C   6      98.450  60.160  36.220  1.00  0.00            
ATOM   4049  CG1 VAL C   6      98.670  61.740  34.740  1.00  0.00            
ATOM   4050 1HG1 VAL C   6      98.200  62.520  35.370  1.00  0.00            
ATOM   4051 2HG1 VAL C   6      99.770  61.820  34.870  1.00  0.00            
ATOM   4052 3HG1 VAL C   6      98.410  61.940  33.680  1.00  0.00            
ATOM   4053  CG2 VAL C   6      96.610  60.360  35.100  1.00  0.00            
ATOM   4054 1HG2 VAL C   6      96.200  61.190  35.710  1.00  0.00            
ATOM   4055 2HG2 VAL C   6      96.270  60.490  34.050  1.00  0.00            
ATOM   4056 3HG2 VAL C   6      96.170  59.420  35.490  1.00  0.00            
ATOM   4057  C   VAL C   6     100.180  58.970  34.380  1.00  0.00            
ATOM   4058  O   VAL C   6     100.600  57.900  34.830  1.00  0.00            
ATOM   4059  N   PRO C   7     100.970  59.850  33.780  1.00  0.00            
ATOM   4060  CD  PRO C   7     101.170  59.300  32.470  1.00  0.00            
ATOM   4061  HD1 PRO C   7     101.150  60.180  31.820  1.00  0.00            
ATOM   4062  HD2 PRO C   7     100.350  58.620  32.120  1.00  0.00            
ATOM   4063  CA  PRO C   7     102.330  60.210  34.220  1.00  0.00            
ATOM   4064  HA  PRO C   7     102.400  60.310  35.280  1.00  0.00            
ATOM   4065  CB  PRO C   7     103.260  59.110  33.690  1.00  0.00            
ATOM   4066  HB1 PRO C   7     104.270  59.490  33.420  1.00  0.00            
ATOM   4067  HB2 PRO C   7     103.380  58.300  34.440  1.00  0.00            
ATOM   4068  CG  PRO C   7     102.510  58.540  32.500  1.00  0.00            
ATOM   4069  HG1 PRO C   7     103.090  58.670  31.570  1.00  0.00            
ATOM   4070  HG2 PRO C   7     102.320  57.460  32.650  1.00  0.00            
ATOM   4071  C   PRO C   7     102.780  61.580  33.740  1.00  0.00            
ATOM   4072  O   PRO C   7     102.740  61.890  32.550  1.00  0.00            
ATOM   4073  N   MET C   8     103.280  62.410  34.660  1.00  0.00            
ATOM   4074  HN  MET C   8     103.230  62.170  35.630  1.00  0.00            
ATOM   4075  CA  MET C   8     104.080  63.570  34.330  1.00  0.00            
ATOM   4076  HA  MET C   8     103.970  63.800  33.280  1.00  0.00            
ATOM   4077  CB  MET C   8     103.640  64.850  35.090  1.00  0.00            
ATOM   4078  HB1 MET C   8     103.580  64.630  36.180  1.00  0.00            
ATOM   4079  HB2 MET C   8     104.390  65.660  34.940  1.00  0.00            
ATOM   4080  CG  MET C   8     102.280  65.340  34.570  1.00  0.00            
ATOM   4081  HG1 MET C   8     102.350  65.460  33.470  1.00  0.00            
ATOM   4082  HG2 MET C   8     101.520  64.540  34.760  1.00  0.00            
ATOM   4083  SD  MET C   8     101.710  66.900  35.310  1.00  0.00            
ATOM   4084  CE  MET C   8     100.180  66.900  34.340  1.00  0.00            
ATOM   4085  HE1 MET C   8      99.540  67.770  34.580  1.00  0.00            
ATOM   4086  HE2 MET C   8     100.390  66.930  33.250  1.00  0.00            
ATOM   4087  HE3 MET C   8      99.580  65.980  34.530  1.00  0.00            
ATOM   4088  C   MET C   8     105.560  63.240  34.520  1.00  0.00            
ATOM   4089  O   MET C   8     105.920  62.150  34.970  1.00  0.00            
ATOM   4090  N   PRO C   9     106.350  64.090  33.900  1.00  0.00            
ATOM   4091  CD  PRO C   9     106.590  63.460  32.630  1.00  0.00            
ATOM   4092  HD1 PRO C   9     106.510  64.310  31.930  1.00  0.00            
ATOM   4093  HD2 PRO C   9     105.820  62.710  32.310  1.00  0.00            
ATOM   4094  CA  PRO C   9     107.690  64.500  34.360  1.00  0.00            
ATOM   4095  HA  PRO C   9     107.740  64.670  35.410  1.00  0.00            
ATOM   4096  CB  PRO C   9     108.660  63.400  33.890  1.00  0.00            
ATOM   4097  HB1 PRO C   9     109.680  63.780  33.660  1.00  0.00            
ATOM   4098  HB2 PRO C   9     108.740  62.600  34.650  1.00  0.00            
ATOM   4099  CG  PRO C   9     107.970  62.800  32.670  1.00  0.00            
ATOM   4100  HG1 PRO C   9     108.560  63.010  31.770  1.00  0.00            
ATOM   4101  HG2 PRO C   9     107.850  61.700  32.790  1.00  0.00            
ATOM   4102  C   PRO C   9     108.100  65.850  33.770  1.00  0.00            
ATOM   4103  O   PRO C   9     107.980  66.090  32.570  1.00  0.00            
ATOM   4104  N   ASP C  10     108.590  66.770  34.620  1.00  0.00            
ATOM   4105  HN  ASP C  10     108.640  66.590  35.610  1.00  0.00            
ATOM   4106  CA  ASP C  10     109.070  68.060  34.190  1.00  0.00            
ATOM   4107  HA  ASP C  10     109.160  68.090  33.110  1.00  0.00            
ATOM   4108  CB  ASP C  10     108.090  69.150  34.700  1.00  0.00            
ATOM   4109  HB1 ASP C  10     107.190  68.640  35.080  1.00  0.00            
ATOM   4110  HB2 ASP C  10     108.530  69.730  35.540  1.00  0.00            
ATOM   4111  CG  ASP C  10     107.660  70.110  33.600  1.00  0.00            
ATOM   4112  OD1 ASP C  10     106.480  70.000  33.130  1.00  0.00            
ATOM   4113  OD2 ASP C  10     108.400  71.060  33.300  1.00  0.00            
ATOM   4114  C   ASP C  10     110.470  68.230  34.760  1.00  0.00            
ATOM   4115  O   ASP C  10     110.680  68.200  35.970  1.00  0.00            
ATOM   4116  N   LEU C  11     111.500  68.370  33.890  1.00  0.00            
ATOM   4117  HN  LEU C  11     111.310  68.370  32.900  1.00  0.00            
ATOM   4118  CA  LEU C  11     112.860  68.570  34.330  1.00  0.00            
ATOM   4119  HA  LEU C  11     112.900  68.630  35.410  1.00  0.00            
ATOM   4120  CB  LEU C  11     113.880  67.480  33.880  1.00  0.00            
ATOM   4121  HB1 LEU C  11     114.050  67.580  32.790  1.00  0.00            
ATOM   4122  HB2 LEU C  11     114.850  67.690  34.390  1.00  0.00            
ATOM   4123  CG  LEU C  11     113.530  65.990  34.150  1.00  0.00            
ATOM   4124  HG  LEU C  11     112.700  65.710  33.470  1.00  0.00            
ATOM   4125  CD1 LEU C  11     114.750  65.090  33.880  1.00  0.00            
ATOM   4126 1HD1 LEU C  11     114.470  64.020  34.030  1.00  0.00            
ATOM   4127 2HD1 LEU C  11     115.130  65.200  32.850  1.00  0.00            
ATOM   4128 3HD1 LEU C  11     115.570  65.330  34.580  1.00  0.00            
ATOM   4129  CD2 LEU C  11     113.070  65.710  35.570  1.00  0.00            
ATOM   4130 1HD2 LEU C  11     112.850  64.630  35.710  1.00  0.00            
ATOM   4131 2HD2 LEU C  11     113.890  65.990  36.250  1.00  0.00            
ATOM   4132 3HD2 LEU C  11     112.160  66.280  35.850  1.00  0.00            
ATOM   4133  C   LEU C  11     113.360  69.900  33.790  1.00  0.00            
ATOM   4134  O   LEU C  11     113.500  70.070  32.580  1.00  0.00            
ATOM   4135  N   LYS C  12     113.680  70.840  34.700  1.00  0.00            
ATOM   4136  HN  LYS C  12     113.400  70.660  35.650  1.00  0.00            
ATOM   4137  CA  LYS C  12     114.540  72.010  34.520  1.00  0.00            
ATOM   4138  HA  LYS C  12     115.250  71.850  35.310  1.00  0.00            
ATOM   4139  CB  LYS C  12     115.490  71.990  33.290  1.00  0.00            
ATOM   4140  HB1 LYS C  12     115.930  70.970  33.210  1.00  0.00            
ATOM   4141  HB2 LYS C  12     114.840  72.100  32.410  1.00  0.00            
ATOM   4142  CG  LYS C  12     116.620  73.020  33.280  1.00  0.00            
ATOM   4143  HG1 LYS C  12     116.210  73.960  33.700  1.00  0.00            
ATOM   4144  HG2 LYS C  12     117.440  72.650  33.930  1.00  0.00            
ATOM   4145  CD  LYS C  12     117.170  73.350  31.880  1.00  0.00            
ATOM   4146  HD1 LYS C  12     117.560  72.420  31.420  1.00  0.00            
ATOM   4147  HD2 LYS C  12     116.300  73.700  31.280  1.00  0.00            
ATOM   4148  CE  LYS C  12     118.230  74.460  31.870  1.00  0.00            
ATOM   4149  HE1 LYS C  12     117.860  75.360  32.400  1.00  0.00            
ATOM   4150  HE2 LYS C  12     119.170  74.100  32.350  1.00  0.00            
ATOM   4151  NZ  LYS C  12     118.550  74.870  30.490  1.00  0.00            
ATOM   4152  HZ1 LYS C  12     119.300  75.590  30.480  1.00  0.00            
ATOM   4153  HZ2 LYS C  12     118.830  74.040  29.940  1.00  0.00            
ATOM   4154  HZ3 LYS C  12     117.680  75.300  30.060  1.00  0.00            
ATOM   4155  C   LYS C  12     113.910  73.370  34.890  1.00  0.00            
ATOM   4156  O   LYS C  12     113.840  73.720  36.060  1.00  0.00            
ATOM   4157  N   ASN C  13     113.520  74.260  33.960  1.00  0.00            
ATOM   4158  HN  ASN C  13     113.460  74.010  32.990  1.00  0.00            
ATOM   4159  CA  ASN C  13     113.150  75.620  34.350  1.00  0.00            
ATOM   4160  HA  ASN C  13     113.140  75.750  35.430  1.00  0.00            
ATOM   4161  CB  ASN C  13     114.110  76.680  33.720  1.00  0.00            
ATOM   4162  HB1 ASN C  13     114.340  76.360  32.690  1.00  0.00            
ATOM   4163  HB2 ASN C  13     113.620  77.670  33.680  1.00  0.00            
ATOM   4164  CG  ASN C  13     115.410  76.810  34.500  1.00  0.00            
ATOM   4165  OD1 ASN C  13     116.460  76.230  34.210  1.00  0.00            
ATOM   4166  ND2 ASN C  13     115.380  77.690  35.540  1.00  0.00            
ATOM   4167 1HD2 ASN C  13     114.540  78.160  35.760  1.00  0.00            
ATOM   4168 2HD2 ASN C  13     116.220  77.860  36.050  1.00  0.00            
ATOM   4169  C   ASN C  13     111.740  75.960  33.910  1.00  0.00            
ATOM   4170  O   ASN C  13     111.480  76.120  32.730  1.00  0.00            
ATOM   4171  N   VAL C  14     110.830  76.130  34.890  1.00  0.00            
ATOM   4172  HN  VAL C  14     111.080  76.010  35.860  1.00  0.00            
ATOM   4173  CA  VAL C  14     109.410  76.330  34.720  1.00  0.00            
ATOM   4174  HA  VAL C  14     109.120  76.180  33.690  1.00  0.00            
ATOM   4175  CB  VAL C  14     108.640  75.360  35.620  1.00  0.00            
ATOM   4176  HB  VAL C  14     108.930  75.560  36.680  1.00  0.00            
ATOM   4177  CG1 VAL C  14     107.120  75.530  35.480  1.00  0.00            
ATOM   4178 1HG1 VAL C  14     106.610  74.790  36.140  1.00  0.00            
ATOM   4179 2HG1 VAL C  14     106.780  76.540  35.780  1.00  0.00            
ATOM   4180 3HG1 VAL C  14     106.820  75.330  34.430  1.00  0.00            
ATOM   4181  CG2 VAL C  14     109.060  73.900  35.330  1.00  0.00            
ATOM   4182 1HG2 VAL C  14     108.510  73.210  36.000  1.00  0.00            
ATOM   4183 2HG2 VAL C  14     108.840  73.620  34.280  1.00  0.00            
ATOM   4184 3HG2 VAL C  14     110.140  73.740  35.530  1.00  0.00            
ATOM   4185  C   VAL C  14     109.040  77.750  35.110  1.00  0.00            
ATOM   4186  O   VAL C  14     109.130  78.130  36.280  1.00  0.00            
ATOM   4187  N   LYS C  15     108.630  78.620  34.160  1.00  0.00            
ATOM   4188  HN  LYS C  15     108.640  78.360  33.190  1.00  0.00            
ATOM   4189  CA  LYS C  15     108.200  79.970  34.520  1.00  0.00            
ATOM   4190  HA  LYS C  15     108.650  80.220  35.470  1.00  0.00            
ATOM   4191  CB  LYS C  15     108.700  81.070  33.560  1.00  0.00            
ATOM   4192  HB1 LYS C  15     109.800  80.960  33.460  1.00  0.00            
ATOM   4193  HB2 LYS C  15     108.250  80.910  32.550  1.00  0.00            
ATOM   4194  CG  LYS C  15     108.350  82.470  34.080  1.00  0.00            
ATOM   4195  HG1 LYS C  15     107.250  82.610  33.980  1.00  0.00            
ATOM   4196  HG2 LYS C  15     108.590  82.500  35.160  1.00  0.00            
ATOM   4197  CD  LYS C  15     109.080  83.610  33.360  1.00  0.00            
ATOM   4198  HD1 LYS C  15     110.180  83.480  33.540  1.00  0.00            
ATOM   4199  HD2 LYS C  15     108.900  83.490  32.270  1.00  0.00            
ATOM   4200  CE  LYS C  15     108.600  84.980  33.830  1.00  0.00            
ATOM   4201  HE1 LYS C  15     107.520  85.120  33.580  1.00  0.00            
ATOM   4202  HE2 LYS C  15     108.720  85.070  34.930  1.00  0.00            
ATOM   4203  NZ  LYS C  15     109.370  86.070  33.190  1.00  0.00            
ATOM   4204  HZ1 LYS C  15     109.030  87.000  33.500  1.00  0.00            
ATOM   4205  HZ2 LYS C  15     110.390  85.970  33.410  1.00  0.00            
ATOM   4206  HZ3 LYS C  15     109.250  86.000  32.160  1.00  0.00            
ATOM   4207  C   LYS C  15     106.710  80.090  34.740  1.00  0.00            
ATOM   4208  O   LYS C  15     106.320  80.490  35.830  1.00  0.00            
ATOM   4209  N   SER C  16     105.840  79.760  33.770  1.00  0.00            
ATOM   4210  HN  SER C  16     106.130  79.590  32.820  1.00  0.00            
ATOM   4211  CA  SER C  16     104.410  79.600  34.000  1.00  0.00            
ATOM   4212  HA  SER C  16     104.270  79.460  35.060  1.00  0.00            
ATOM   4213  CB  SER C  16     103.510  80.820  33.650  1.00  0.00            
ATOM   4214  HB1 SER C  16     102.450  80.570  33.880  1.00  0.00            
ATOM   4215  HB2 SER C  16     103.820  81.670  34.310  1.00  0.00            
ATOM   4216  OG  SER C  16     103.600  81.250  32.290  1.00  0.00            
ATOM   4217  HG1 SER C  16     102.890  81.880  32.140  1.00  0.00            
ATOM   4218  C   SER C  16     103.900  78.330  33.350  1.00  0.00            
ATOM   4219  O   SER C  16     104.040  78.090  32.150  1.00  0.00            
ATOM   4220  N   LYS C  17     103.310  77.440  34.160  1.00  0.00            
ATOM   4221  HN  LYS C  17     103.260  77.620  35.150  1.00  0.00            
ATOM   4222  CA  LYS C  17     102.850  76.140  33.710  1.00  0.00            
ATOM   4223  HA  LYS C  17     102.840  76.090  32.630  1.00  0.00            
ATOM   4224  CB  LYS C  17     103.800  75.060  34.280  1.00  0.00            
ATOM   4225  HB1 LYS C  17     104.800  75.260  33.850  1.00  0.00            
ATOM   4226  HB2 LYS C  17     103.880  75.220  35.380  1.00  0.00            
ATOM   4227  CG  LYS C  17     103.430  73.590  34.030  1.00  0.00            
ATOM   4228  HG1 LYS C  17     102.420  73.380  34.440  1.00  0.00            
ATOM   4229  HG2 LYS C  17     103.400  73.400  32.930  1.00  0.00            
ATOM   4230  CD  LYS C  17     104.470  72.670  34.700  1.00  0.00            
ATOM   4231  HD1 LYS C  17     105.440  72.780  34.160  1.00  0.00            
ATOM   4232  HD2 LYS C  17     104.630  73.050  35.740  1.00  0.00            
ATOM   4233  CE  LYS C  17     104.080  71.200  34.780  1.00  0.00            
ATOM   4234  HE1 LYS C  17     103.150  71.050  35.370  1.00  0.00            
ATOM   4235  HE2 LYS C  17     103.910  70.810  33.740  1.00  0.00            
ATOM   4236  NZ  LYS C  17     105.170  70.400  35.380  1.00  0.00            
ATOM   4237  HZ1 LYS C  17     104.920  69.410  35.490  1.00  0.00            
ATOM   4238  HZ2 LYS C  17     105.940  70.410  34.660  1.00  0.00            
ATOM   4239  HZ3 LYS C  17     105.580  70.750  36.280  1.00  0.00            
ATOM   4240  C   LYS C  17     101.440  75.900  34.190  1.00  0.00            
ATOM   4241  O   LYS C  17     101.170  75.940  35.380  1.00  0.00            
ATOM   4242  N   ILE C  18     100.500  75.640  33.260  1.00  0.00            
ATOM   4243  HN  ILE C  18     100.730  75.660  32.280  1.00  0.00            
ATOM   4244  CA  ILE C  18      99.110  75.370  33.560  1.00  0.00            
ATOM   4245  HA  ILE C  18      98.970  75.310  34.620  1.00  0.00            
ATOM   4246  CB  ILE C  18      98.170  76.440  32.990  1.00  0.00            
ATOM   4247  HB  ILE C  18      98.240  76.430  31.880  1.00  0.00            
ATOM   4248  CG2 ILE C  18      96.720  76.120  33.410  1.00  0.00            
ATOM   4249 1HG2 ILE C  18      96.010  76.880  33.010  1.00  0.00            
ATOM   4250 2HG2 ILE C  18      96.390  75.130  33.020  1.00  0.00            
ATOM   4251 3HG2 ILE C  18      96.630  76.110  34.520  1.00  0.00            
ATOM   4252  CG1 ILE C  18      98.590  77.850  33.480  1.00  0.00            
ATOM   4253 1HG1 ILE C  18      98.520  77.890  34.590  1.00  0.00            
ATOM   4254 2HG1 ILE C  18      99.660  78.030  33.210  1.00  0.00            
ATOM   4255  CD  ILE C  18      97.770  79.000  32.870  1.00  0.00            
ATOM   4256  HD1 ILE C  18      98.150  79.980  33.220  1.00  0.00            
ATOM   4257  HD2 ILE C  18      97.840  78.980  31.760  1.00  0.00            
ATOM   4258  HD3 ILE C  18      96.700  78.920  33.150  1.00  0.00            
ATOM   4259  C   ILE C  18      98.750  74.020  32.960  1.00  0.00            
ATOM   4260  O   ILE C  18      98.900  73.780  31.760  1.00  0.00            
ATOM   4261  N   GLY C  19      98.270  73.080  33.800  1.00  0.00            
ATOM   4262  HN  GLY C  19      98.230  73.260  34.780  1.00  0.00            
ATOM   4263  CA  GLY C  19      97.740  71.800  33.320  1.00  0.00            
ATOM   4264  HA1 GLY C  19      97.660  71.800  32.240  1.00  0.00            
ATOM   4265  HA2 GLY C  19      98.380  71.020  33.700  1.00  0.00            
ATOM   4266  C   GLY C  19      96.370  71.560  33.880  1.00  0.00            
ATOM   4267  O   GLY C  19      96.190  71.610  35.090  1.00  0.00            
ATOM   4268  N   SER C  20      95.380  71.270  33.020  1.00  0.00            
ATOM   4269  HN  SER C  20      95.530  71.300  32.020  1.00  0.00            
ATOM   4270  CA  SER C  20      94.030  70.940  33.450  1.00  0.00            
ATOM   4271  HA  SER C  20      94.030  70.780  34.510  1.00  0.00            
ATOM   4272  CB  SER C  20      92.990  72.060  33.190  1.00  0.00            
ATOM   4273  HB1 SER C  20      91.970  71.700  33.480  1.00  0.00            
ATOM   4274  HB2 SER C  20      93.260  72.910  33.850  1.00  0.00            
ATOM   4275  OG  SER C  20      92.970  72.520  31.830  1.00  0.00            
ATOM   4276  HG1 SER C  20      92.350  73.250  31.790  1.00  0.00            
ATOM   4277  C   SER C  20      93.550  69.630  32.840  1.00  0.00            
ATOM   4278  O   SER C  20      93.570  69.420  31.620  1.00  0.00            
ATOM   4279  N   THR C  21      93.110  68.690  33.690  1.00  0.00            
ATOM   4280  HN  THR C  21      93.140  68.880  34.680  1.00  0.00            
ATOM   4281  CA  THR C  21      92.680  67.360  33.280  1.00  0.00            
ATOM   4282  HA  THR C  21      92.650  67.280  32.210  1.00  0.00            
ATOM   4283  CB  THR C  21      93.570  66.260  33.850  1.00  0.00            
ATOM   4284  HB  THR C  21      93.620  66.360  34.960  1.00  0.00            
ATOM   4285  OG1 THR C  21      94.890  66.370  33.330  1.00  0.00            
ATOM   4286  HG1 THR C  21      95.430  65.790  33.870  1.00  0.00            
ATOM   4287  CG2 THR C  21      93.100  64.850  33.460  1.00  0.00            
ATOM   4288 1HG2 THR C  21      93.790  64.090  33.860  1.00  0.00            
ATOM   4289 2HG2 THR C  21      92.090  64.630  33.870  1.00  0.00            
ATOM   4290 3HG2 THR C  21      93.070  64.750  32.360  1.00  0.00            
ATOM   4291  C   THR C  21      91.280  67.130  33.810  1.00  0.00            
ATOM   4292  O   THR C  21      91.060  67.090  35.020  1.00  0.00            
ATOM   4293  N   GLU C  22      90.280  66.960  32.910  1.00  0.00            
ATOM   4294  HN  GLU C  22      90.470  67.020  31.920  1.00  0.00            
ATOM   4295  CA  GLU C  22      88.900  66.740  33.290  1.00  0.00            
ATOM   4296  HA  GLU C  22      88.860  66.570  34.360  1.00  0.00            
ATOM   4297  CB  GLU C  22      88.020  68.030  33.090  1.00  0.00            
ATOM   4298  HB1 GLU C  22      86.960  67.810  33.330  1.00  0.00            
ATOM   4299  HB2 GLU C  22      88.390  68.760  33.850  1.00  0.00            
ATOM   4300  CG  GLU C  22      88.110  68.800  31.740  1.00  0.00            
ATOM   4301  HG1 GLU C  22      89.150  68.790  31.350  1.00  0.00            
ATOM   4302  HG2 GLU C  22      87.460  68.270  31.010  1.00  0.00            
ATOM   4303  CD  GLU C  22      87.670  70.270  31.780  1.00  0.00            
ATOM   4304  OE1 GLU C  22      88.340  71.160  32.400  1.00  0.00            
ATOM   4305  OE2 GLU C  22      86.670  70.620  31.090  1.00  0.00            
ATOM   4306  C   GLU C  22      88.370  65.430  32.690  1.00  0.00            
ATOM   4307  O   GLU C  22      88.350  65.200  31.480  1.00  0.00            
ATOM   4308  N   ASN C  23      87.990  64.460  33.560  1.00  0.00            
ATOM   4309  HN  ASN C  23      88.010  64.660  34.550  1.00  0.00            
ATOM   4310  CA  ASN C  23      87.620  63.100  33.160  1.00  0.00            
ATOM   4311  HA  ASN C  23      87.580  63.030  32.080  1.00  0.00            
ATOM   4312  CB  ASN C  23      88.570  62.020  33.750  1.00  0.00            
ATOM   4313  HB1 ASN C  23      88.510  62.020  34.860  1.00  0.00            
ATOM   4314  HB2 ASN C  23      88.280  61.010  33.390  1.00  0.00            
ATOM   4315  CG  ASN C  23      90.050  62.200  33.410  1.00  0.00            
ATOM   4316  OD1 ASN C  23      90.910  61.890  34.230  1.00  0.00            
ATOM   4317  ND2 ASN C  23      90.370  62.670  32.190  1.00  0.00            
ATOM   4318 1HD2 ASN C  23      89.670  63.000  31.560  1.00  0.00            
ATOM   4319 2HD2 ASN C  23      91.330  62.620  31.910  1.00  0.00            
ATOM   4320  C   ASN C  23      86.240  62.740  33.680  1.00  0.00            
ATOM   4321  O   ASN C  23      86.050  62.600  34.890  1.00  0.00            
ATOM   4322  N   LEU C  24      85.240  62.520  32.800  1.00  0.00            
ATOM   4323  HN  LEU C  24      85.410  62.600  31.810  1.00  0.00            
ATOM   4324  CA  LEU C  24      83.870  62.240  33.220  1.00  0.00            
ATOM   4325  HA  LEU C  24      83.810  62.230  34.300  1.00  0.00            
ATOM   4326  CB  LEU C  24      82.850  63.290  32.710  1.00  0.00            
ATOM   4327  HB1 LEU C  24      82.710  63.160  31.610  1.00  0.00            
ATOM   4328  HB2 LEU C  24      81.870  63.090  33.190  1.00  0.00            
ATOM   4329  CG  LEU C  24      83.200  64.780  32.940  1.00  0.00            
ATOM   4330  HG  LEU C  24      84.040  65.060  32.260  1.00  0.00            
ATOM   4331  CD1 LEU C  24      81.990  65.680  32.650  1.00  0.00            
ATOM   4332 1HD1 LEU C  24      82.270  66.750  32.790  1.00  0.00            
ATOM   4333 2HD1 LEU C  24      81.620  65.550  31.620  1.00  0.00            
ATOM   4334 3HD1 LEU C  24      81.160  65.440  33.350  1.00  0.00            
ATOM   4335  CD2 LEU C  24      83.650  65.090  34.370  1.00  0.00            
ATOM   4336 1HD2 LEU C  24      83.820  66.180  34.500  1.00  0.00            
ATOM   4337 2HD2 LEU C  24      82.850  64.760  35.050  1.00  0.00            
ATOM   4338 3HD2 LEU C  24      84.590  64.570  34.640  1.00  0.00            
ATOM   4339  C   LEU C  24      83.410  60.870  32.730  1.00  0.00            
ATOM   4340  O   LEU C  24      83.500  60.540  31.550  1.00  0.00            
ATOM   4341  N   LYS C  25      82.890  60.030  33.630  1.00  0.00            
ATOM   4342  HN  LYS C  25      82.910  60.280  34.610  1.00  0.00            
ATOM   4343  CA  LYS C  25      82.310  58.750  33.280  1.00  0.00            
ATOM   4344  HA  LYS C  25      82.270  58.640  32.200  1.00  0.00            
ATOM   4345  CB  LYS C  25      83.120  57.570  33.880  1.00  0.00            
ATOM   4346  HB1 LYS C  25      84.140  57.580  33.430  1.00  0.00            
ATOM   4347  HB2 LYS C  25      83.250  57.770  34.970  1.00  0.00            
ATOM   4348  CG  LYS C  25      82.470  56.180  33.700  1.00  0.00            
ATOM   4349  HG1 LYS C  25      81.410  56.220  34.060  1.00  0.00            
ATOM   4350  HG2 LYS C  25      82.430  55.930  32.620  1.00  0.00            
ATOM   4351  CD  LYS C  25      83.160  55.080  34.510  1.00  0.00            
ATOM   4352  HD1 LYS C  25      84.060  54.760  33.950  1.00  0.00            
ATOM   4353  HD2 LYS C  25      83.500  55.530  35.480  1.00  0.00            
ATOM   4354  CE  LYS C  25      82.210  53.920  34.810  1.00  0.00            
ATOM   4355  HE1 LYS C  25      81.380  54.240  35.490  1.00  0.00            
ATOM   4356  HE2 LYS C  25      81.760  53.540  33.870  1.00  0.00            
ATOM   4357  NZ  LYS C  25      82.940  52.810  35.450  1.00  0.00            
ATOM   4358  HZ1 LYS C  25      82.290  52.010  35.640  1.00  0.00            
ATOM   4359  HZ2 LYS C  25      83.670  52.500  34.770  1.00  0.00            
ATOM   4360  HZ3 LYS C  25      83.410  53.100  36.330  1.00  0.00            
ATOM   4361  C   LYS C  25      80.890  58.630  33.800  1.00  0.00            
ATOM   4362  O   LYS C  25      80.640  58.650  35.000  1.00  0.00            
ATOM   4363  N   HSD C  26      79.930  58.400  32.890  1.00  0.00            
ATOM   4364  HN  HSD C  26      80.130  58.460  31.910  1.00  0.00            
ATOM   4365  CA  HSD C  26      78.570  58.050  33.260  1.00  0.00            
ATOM   4366  HA  HSD C  26      78.430  58.170  34.320  1.00  0.00            
ATOM   4367  CB  HSD C  26      77.530  58.940  32.550  1.00  0.00            
ATOM   4368  HB1 HSD C  26      77.670  58.890  31.450  1.00  0.00            
ATOM   4369  HB2 HSD C  26      76.500  58.580  32.780  1.00  0.00            
ATOM   4370  ND1 HSD C  26      76.740  61.340  32.440  1.00  0.00            
ATOM   4371  HD1 HSD C  26      76.100  61.220  31.680  1.00  0.00            
ATOM   4372  CG  HSD C  26      77.590  60.390  32.970  1.00  0.00            
ATOM   4373  CE1 HSD C  26      77.040  62.520  33.040  1.00  0.00            
ATOM   4374  HE1 HSD C  26      76.550  63.460  32.800  1.00  0.00            
ATOM   4375  NE2 HSD C  26      78.000  62.380  33.920  1.00  0.00            
ATOM   4376  CD2 HSD C  26      78.360  61.050  33.880  1.00  0.00            
ATOM   4377  HD2 HSD C  26      79.160  60.700  34.510  1.00  0.00            
ATOM   4378  C   HSD C  26      78.290  56.580  32.960  1.00  0.00            
ATOM   4379  O   HSD C  26      78.750  56.000  31.970  1.00  0.00            
ATOM   4380  N   GLN C  27      77.510  55.940  33.850  1.00  0.00            
ATOM   4381  HN  GLN C  27      77.170  56.410  34.660  1.00  0.00            
ATOM   4382  CA  GLN C  27      76.950  54.630  33.650  1.00  0.00            
ATOM   4383  HA  GLN C  27      77.000  54.390  32.600  1.00  0.00            
ATOM   4384  CB  GLN C  27      77.760  53.530  34.370  1.00  0.00            
ATOM   4385  HB1 GLN C  27      78.830  53.710  34.090  1.00  0.00            
ATOM   4386  HB2 GLN C  27      77.670  53.670  35.470  1.00  0.00            
ATOM   4387  CG  GLN C  27      77.400  52.080  33.970  1.00  0.00            
ATOM   4388  HG1 GLN C  27      76.420  51.770  34.400  1.00  0.00            
ATOM   4389  HG2 GLN C  27      77.310  51.990  32.870  1.00  0.00            
ATOM   4390  CD  GLN C  27      78.480  51.090  34.410  1.00  0.00            
ATOM   4391  OE1 GLN C  27      78.900  50.190  33.690  1.00  0.00            
ATOM   4392  NE2 GLN C  27      79.020  51.310  35.630  1.00  0.00            
ATOM   4393 1HE2 GLN C  27      78.660  52.080  36.150  1.00  0.00            
ATOM   4394 2HE2 GLN C  27      79.390  50.510  36.100  1.00  0.00            
ATOM   4395  C   GLN C  27      75.480  54.750  34.070  1.00  0.00            
ATOM   4396  O   GLN C  27      75.120  55.770  34.650  1.00  0.00            
ATOM   4397  N   PRO C  28      74.650  53.810  33.570  1.00  0.00            
ATOM   4398  CD  PRO C  28      74.460  54.270  32.230  1.00  0.00            
ATOM   4399  HD1 PRO C  28      74.470  53.360  31.610  1.00  0.00            
ATOM   4400  HD2 PRO C  28      75.240  54.940  31.820  1.00  0.00            
ATOM   4401  CA  PRO C  28      73.270  53.500  34.010  1.00  0.00            
ATOM   4402  HA  PRO C  28      73.200  53.310  35.050  1.00  0.00            
ATOM   4403  CB  PRO C  28      72.450  54.700  33.530  1.00  0.00            
ATOM   4404  HB1 PRO C  28      71.370  54.480  33.380  1.00  0.00            
ATOM   4405  HB2 PRO C  28      72.540  55.560  34.230  1.00  0.00            
ATOM   4406  CG  PRO C  28      73.130  55.070  32.220  1.00  0.00            
ATOM   4407  HG1 PRO C  28      72.470  54.760  31.390  1.00  0.00            
ATOM   4408  HG2 PRO C  28      73.330  56.160  32.140  1.00  0.00            
ATOM   4409  C   PRO C  28      72.660  52.220  33.390  1.00  0.00            
ATOM   4410  O   PRO C  28      72.590  52.040  32.180  1.00  0.00            
ATOM   4411  N   GLY C  29      72.170  51.290  34.240  1.00  0.00            
ATOM   4412  HN  GLY C  29      72.220  51.440  35.240  1.00  0.00            
ATOM   4413  CA  GLY C  29      71.550  50.050  33.780  1.00  0.00            
ATOM   4414  HA1 GLY C  29      71.470  50.040  32.700  1.00  0.00            
ATOM   4415  HA2 GLY C  29      72.140  49.230  34.160  1.00  0.00            
ATOM   4416  C   GLY C  29      70.160  49.890  34.330  1.00  0.00            
ATOM   4417  O   GLY C  29      69.940  49.950  35.540  1.00  0.00            
ATOM   4418  N   GLY C  30      69.150  49.670  33.460  1.00  0.00            
ATOM   4419  HN  GLY C  30      69.360  49.660  32.480  1.00  0.00            
ATOM   4420  CA  GLY C  30      67.760  49.520  33.890  1.00  0.00            
ATOM   4421  HA1 GLY C  30      67.700  49.510  34.970  1.00  0.00            
ATOM   4422  HA2 GLY C  30      67.220  50.340  33.440  1.00  0.00            
ATOM   4423  C   GLY C  30      67.130  48.250  33.390  1.00  0.00            
ATOM   4424  O   GLY C  30      66.810  48.150  32.210  1.00  0.00            
ATOM   4425  N   GLY C  31      66.880  47.280  34.280  1.00  0.00            
ATOM   4426  HN  GLY C  31      67.090  47.440  35.260  1.00  0.00            
ATOM   4427  CA  GLY C  31      66.280  45.990  33.960  1.00  0.00            
ATOM   4428  HA1 GLY C  31      66.240  45.860  32.880  1.00  0.00            
ATOM   4429  HA2 GLY C  31      66.880  45.230  34.440  1.00  0.00            
ATOM   4430  C   GLY C  31      64.880  45.860  34.500  1.00  0.00            
ATOM   4431  O   GLY C  31      64.570  46.300  35.610  1.00  0.00            
ATOM   4432  N   LYS C  32      63.960  45.270  33.710  1.00  0.00            
ATOM   4433  HN  LYS C  32      64.200  44.940  32.800  1.00  0.00            
ATOM   4434  CA  LYS C  32      62.560  45.120  34.100  1.00  0.00            
ATOM   4435  HA  LYS C  32      62.470  45.160  35.170  1.00  0.00            
ATOM   4436  CB  LYS C  32      61.670  46.230  33.430  1.00  0.00            
ATOM   4437  HB1 LYS C  32      61.440  45.920  32.390  1.00  0.00            
ATOM   4438  HB2 LYS C  32      60.710  46.290  33.990  1.00  0.00            
ATOM   4439  CG  LYS C  32      62.340  47.610  33.340  1.00  0.00            
ATOM   4440  HG1 LYS C  32      62.640  47.950  34.360  1.00  0.00            
ATOM   4441  HG2 LYS C  32      63.280  47.500  32.740  1.00  0.00            
ATOM   4442  CD  LYS C  32      61.460  48.640  32.630  1.00  0.00            
ATOM   4443  HD1 LYS C  32      61.090  48.160  31.690  1.00  0.00            
ATOM   4444  HD2 LYS C  32      60.570  48.850  33.270  1.00  0.00            
ATOM   4445  CE  LYS C  32      62.250  49.910  32.290  1.00  0.00            
ATOM   4446  HE1 LYS C  32      62.670  50.380  33.200  1.00  0.00            
ATOM   4447  HE2 LYS C  32      63.080  49.670  31.580  1.00  0.00            
ATOM   4448  NZ  LYS C  32      61.340  50.880  31.640  1.00  0.00            
ATOM   4449  HZ1 LYS C  32      61.870  51.740  31.370  1.00  0.00            
ATOM   4450  HZ2 LYS C  32      60.940  50.420  30.800  1.00  0.00            
ATOM   4451  HZ3 LYS C  32      60.580  51.120  32.290  1.00  0.00            
ATOM   4452  C   LYS C  32      62.050  43.770  33.630  1.00  0.00            
ATOM   4453  O   LYS C  32      62.140  43.480  32.440  1.00  0.00            
ATOM   4454  N   VAL C  33      61.510  42.920  34.530  1.00  0.00            
ATOM   4455  HN  VAL C  33      61.490  43.140  35.510  1.00  0.00            
ATOM   4456  CA  VAL C  33      61.050  41.580  34.180  1.00  0.00            
ATOM   4457  HA  VAL C  33      60.950  41.490  33.110  1.00  0.00            
ATOM   4458  CB  VAL C  33      62.010  40.480  34.670  1.00  0.00            
ATOM   4459  HB  VAL C  33      62.020  40.460  35.780  1.00  0.00            
ATOM   4460  CG1 VAL C  33      61.570  39.100  34.130  1.00  0.00            
ATOM   4461 1HG1 VAL C  33      62.290  38.320  34.440  1.00  0.00            
ATOM   4462 2HG1 VAL C  33      60.570  38.810  34.510  1.00  0.00            
ATOM   4463 3HG1 VAL C  33      61.530  39.120  33.010  1.00  0.00            
ATOM   4464  CG2 VAL C  33      63.450  40.780  34.190  1.00  0.00            
ATOM   4465 1HG2 VAL C  33      64.120  39.950  34.490  1.00  0.00            
ATOM   4466 2HG2 VAL C  33      63.470  40.870  33.080  1.00  0.00            
ATOM   4467 3HG2 VAL C  33      63.830  41.720  34.640  1.00  0.00            
ATOM   4468  C   VAL C  33      59.680  41.310  34.800  1.00  0.00            
ATOM   4469  O   VAL C  33      59.470  41.510  35.990  1.00  0.00            
ATOM   4470  N   GLN C  34      58.690  40.860  33.990  1.00  0.00            
ATOM   4471  HN  GLN C  34      58.850  40.760  33.010  1.00  0.00            
ATOM   4472  CA  GLN C  34      57.360  40.530  34.490  1.00  0.00            
ATOM   4473  HA  GLN C  34      57.390  40.440  35.560  1.00  0.00            
ATOM   4474  CB  GLN C  34      56.310  41.620  34.110  1.00  0.00            
ATOM   4475  HB1 GLN C  34      55.850  41.370  33.130  1.00  0.00            
ATOM   4476  HB2 GLN C  34      55.510  41.590  34.890  1.00  0.00            
ATOM   4477  CG  GLN C  34      56.900  43.040  34.000  1.00  0.00            
ATOM   4478  HG1 GLN C  34      57.450  43.300  34.930  1.00  0.00            
ATOM   4479  HG2 GLN C  34      57.620  43.080  33.150  1.00  0.00            
ATOM   4480  CD  GLN C  34      55.890  44.170  33.750  1.00  0.00            
ATOM   4481  OE1 GLN C  34      56.280  45.340  33.730  1.00  0.00            
ATOM   4482  NE2 GLN C  34      54.600  43.840  33.540  1.00  0.00            
ATOM   4483 1HE2 GLN C  34      54.330  42.880  33.550  1.00  0.00            
ATOM   4484 2HE2 GLN C  34      53.970  44.590  33.380  1.00  0.00            
ATOM   4485  C   GLN C  34      56.900  39.190  33.930  1.00  0.00            
ATOM   4486  O   GLN C  34      56.900  38.990  32.720  1.00  0.00            
ATOM   4487  N   ILE C  35      56.500  38.230  34.790  1.00  0.00            
ATOM   4488  HN  ILE C  35      56.530  38.380  35.780  1.00  0.00            
ATOM   4489  CA  ILE C  35      56.020  36.920  34.360  1.00  0.00            
ATOM   4490  HA  ILE C  35      55.870  36.930  33.290  1.00  0.00            
ATOM   4491  CB  ILE C  35      56.990  35.770  34.660  1.00  0.00            
ATOM   4492  HB  ILE C  35      57.100  35.680  35.770  1.00  0.00            
ATOM   4493  CG2 ILE C  35      56.430  34.440  34.100  1.00  0.00            
ATOM   4494 1HG2 ILE C  35      57.120  33.600  34.310  1.00  0.00            
ATOM   4495 2HG2 ILE C  35      55.460  34.170  34.560  1.00  0.00            
ATOM   4496 3HG2 ILE C  35      56.300  34.510  33.000  1.00  0.00            
ATOM   4497  CG1 ILE C  35      58.390  36.080  34.070  1.00  0.00            
ATOM   4498 1HG1 ILE C  35      58.300  36.170  32.960  1.00  0.00            
ATOM   4499 2HG1 ILE C  35      58.750  37.060  34.450  1.00  0.00            
ATOM   4500  CD  ILE C  35      59.460  35.030  34.410  1.00  0.00            
ATOM   4501  HD1 ILE C  35      60.440  35.330  33.990  1.00  0.00            
ATOM   4502  HD2 ILE C  35      59.560  34.920  35.510  1.00  0.00            
ATOM   4503  HD3 ILE C  35      59.200  34.040  33.980  1.00  0.00            
ATOM   4504  C   ILE C  35      54.660  36.630  34.990  1.00  0.00            
ATOM   4505  O   ILE C  35      54.490  36.690  36.200  1.00  0.00            
ATOM   4506  N   ILE C  36      53.630  36.320  34.170  1.00  0.00            
ATOM   4507  HN  ILE C  36      53.770  36.300  33.180  1.00  0.00            
ATOM   4508  CA  ILE C  36      52.300  36.000  34.680  1.00  0.00            
ATOM   4509  HA  ILE C  36      52.340  35.860  35.750  1.00  0.00            
ATOM   4510  CB  ILE C  36      51.260  37.080  34.380  1.00  0.00            
ATOM   4511  HB  ILE C  36      51.160  37.190  33.270  1.00  0.00            
ATOM   4512  CG2 ILE C  36      49.890  36.680  34.980  1.00  0.00            
ATOM   4513 1HG2 ILE C  36      49.140  37.470  34.780  1.00  0.00            
ATOM   4514 2HG2 ILE C  36      49.510  35.740  34.530  1.00  0.00            
ATOM   4515 3HG2 ILE C  36      49.970  36.540  36.080  1.00  0.00            
ATOM   4516  CG1 ILE C  36      51.720  38.450  34.940  1.00  0.00            
ATOM   4517 1HG1 ILE C  36      51.820  38.370  36.050  1.00  0.00            
ATOM   4518 2HG1 ILE C  36      52.720  38.690  34.530  1.00  0.00            
ATOM   4519  CD  ILE C  36      50.780  39.620  34.600  1.00  0.00            
ATOM   4520  HD1 ILE C  36      51.200  40.570  34.990  1.00  0.00            
ATOM   4521  HD2 ILE C  36      50.660  39.710  33.500  1.00  0.00            
ATOM   4522  HD3 ILE C  36      49.770  39.480  35.050  1.00  0.00            
ATOM   4523  C   ILE C  36      51.830  34.680  34.090  1.00  0.00            
ATOM   4524  O   ILE C  36      51.760  34.500  32.870  1.00  0.00            
ATOM   4525  N   ASN C  37      51.460  33.700  34.940  1.00  0.00            
ATOM   4526  HN  ASN C  37      51.520  33.850  35.930  1.00  0.00            
ATOM   4527  CA  ASN C  37      50.960  32.410  34.480  1.00  0.00            
ATOM   4528  HA  ASN C  37      50.810  32.440  33.410  1.00  0.00            
ATOM   4529  CB  ASN C  37      51.930  31.240  34.790  1.00  0.00            
ATOM   4530  HB1 ASN C  37      51.980  31.060  35.880  1.00  0.00            
ATOM   4531  HB2 ASN C  37      51.590  30.310  34.290  1.00  0.00            
ATOM   4532  CG  ASN C  37      53.360  31.540  34.330  1.00  0.00            
ATOM   4533  OD1 ASN C  37      54.310  31.390  35.110  1.00  0.00            
ATOM   4534  ND2 ASN C  37      53.550  31.950  33.060  1.00  0.00            
ATOM   4535 1HD2 ASN C  37      52.780  32.180  32.480  1.00  0.00            
ATOM   4536 2HD2 ASN C  37      54.480  32.020  32.720  1.00  0.00            
ATOM   4537  C   ASN C  37      49.600  32.120  35.100  1.00  0.00            
ATOM   4538  O   ASN C  37      49.430  32.170  36.320  1.00  0.00            
ATOM   4539  N   LYS C  38      48.580  31.820  34.280  1.00  0.00            
ATOM   4540  HN  LYS C  38      48.720  31.780  33.280  1.00  0.00            
ATOM   4541  CA  LYS C  38      47.240  31.540  34.760  1.00  0.00            
ATOM   4542  HA  LYS C  38      47.250  31.420  35.840  1.00  0.00            
ATOM   4543  CB  LYS C  38      46.220  32.670  34.380  1.00  0.00            
ATOM   4544  HB1 LYS C  38      46.050  32.620  33.280  1.00  0.00            
ATOM   4545  HB2 LYS C  38      45.250  32.440  34.880  1.00  0.00            
ATOM   4546  CG  LYS C  38      46.650  34.120  34.730  1.00  0.00            
ATOM   4547  HG1 LYS C  38      46.790  34.180  35.840  1.00  0.00            
ATOM   4548  HG2 LYS C  38      47.640  34.310  34.260  1.00  0.00            
ATOM   4549  CD  LYS C  38      45.650  35.220  34.250  1.00  0.00            
ATOM   4550  HD1 LYS C  38      45.540  35.090  33.150  1.00  0.00            
ATOM   4551  HD2 LYS C  38      44.670  35.020  34.720  1.00  0.00            
ATOM   4552  CE  LYS C  38      46.090  36.700  34.540  1.00  0.00            
ATOM   4553  HE1 LYS C  38      46.140  36.850  35.640  1.00  0.00            
ATOM   4554  HE2 LYS C  38      47.100  36.860  34.110  1.00  0.00            
ATOM   4555  NZ  LYS C  38      45.200  37.770  33.980  1.00  0.00            
ATOM   4556  HZ1 LYS C  38      45.590  38.760  34.120  1.00  0.00            
ATOM   4557  HZ2 LYS C  38      45.100  37.690  32.950  1.00  0.00            
ATOM   4558  HZ3 LYS C  38      44.250  37.790  34.390  1.00  0.00            
ATOM   4559  C   LYS C  38      46.770  30.200  34.180  1.00  0.00            
ATOM   4560  O   LYS C  38      46.720  30.040  32.960  1.00  0.00            
ATOM   4561  N   LYS C  39      46.430  29.200  35.030  1.00  0.00            
ATOM   4562  HN  LYS C  39      46.490  29.320  36.020  1.00  0.00            
ATOM   4563  CA  LYS C  39      45.910  27.920  34.570  1.00  0.00            
ATOM   4564  HA  LYS C  39      45.750  27.960  33.500  1.00  0.00            
ATOM   4565  CB  LYS C  39      46.880  26.730  34.850  1.00  0.00            
ATOM   4566  HB1 LYS C  39      47.870  26.960  34.410  1.00  0.00            
ATOM   4567  HB2 LYS C  39      47.020  26.630  35.950  1.00  0.00            
ATOM   4568  CG  LYS C  39      46.350  25.410  34.260  1.00  0.00            
ATOM   4569  HG1 LYS C  39      45.290  25.280  34.590  1.00  0.00            
ATOM   4570  HG2 LYS C  39      46.330  25.490  33.150  1.00  0.00            
ATOM   4571  CD  LYS C  39      47.060  24.110  34.680  1.00  0.00            
ATOM   4572  HD1 LYS C  39      48.070  24.040  34.230  1.00  0.00            
ATOM   4573  HD2 LYS C  39      47.160  24.110  35.790  1.00  0.00            
ATOM   4574  CE  LYS C  39      46.160  22.950  34.230  1.00  0.00            
ATOM   4575  HE1 LYS C  39      45.110  23.190  34.540  1.00  0.00            
ATOM   4576  HE2 LYS C  39      46.160  22.850  33.130  1.00  0.00            
ATOM   4577  NZ  LYS C  39      46.460  21.630  34.820  1.00  0.00            
ATOM   4578  HZ1 LYS C  39      45.560  21.080  34.580  1.00  0.00            
ATOM   4579  HZ2 LYS C  39      47.270  21.140  34.420  1.00  0.00            
ATOM   4580  HZ3 LYS C  39      46.470  21.650  35.850  1.00  0.00            
ATOM   4581  C   LYS C  39      44.580  27.610  35.230  1.00  0.00            
ATOM   4582  O   LYS C  39      44.490  27.550  36.450  1.00  0.00            
ATOM   4583  N   LEU C  40      43.500  27.350  34.450  1.00  0.00            
ATOM   4584  HN  LEU C  40      43.570  27.380  33.450  1.00  0.00            
ATOM   4585  CA  LEU C  40      42.240  26.870  34.990  1.00  0.00            
ATOM   4586  HA  LEU C  40      42.330  26.710  36.050  1.00  0.00            
ATOM   4587  CB  LEU C  40      41.040  27.850  34.770  1.00  0.00            
ATOM   4588  HB1 LEU C  40      40.700  27.760  33.720  1.00  0.00            
ATOM   4589  HB2 LEU C  40      40.190  27.510  35.410  1.00  0.00            
ATOM   4590  CG  LEU C  40      41.300  29.350  35.060  1.00  0.00            
ATOM   4591  HG  LEU C  40      42.080  29.710  34.350  1.00  0.00            
ATOM   4592  CD1 LEU C  40      40.010  30.160  34.830  1.00  0.00            
ATOM   4593 1HD1 LEU C  40      40.200  31.240  35.000  1.00  0.00            
ATOM   4594 2HD1 LEU C  40      39.630  30.030  33.790  1.00  0.00            
ATOM   4595 3HD1 LEU C  40      39.220  29.830  35.530  1.00  0.00            
ATOM   4596  CD2 LEU C  40      41.800  29.650  36.470  1.00  0.00            
ATOM   4597 1HD2 LEU C  40      41.950  30.740  36.620  1.00  0.00            
ATOM   4598 2HD2 LEU C  40      41.030  29.300  37.180  1.00  0.00            
ATOM   4599 3HD2 LEU C  40      42.750  29.130  36.690  1.00  0.00            
ATOM   4600  C   LEU C  40      41.900  25.520  34.360  1.00  0.00            
ATOM   4601  O   LEU C  40      42.040  25.350  33.150  1.00  0.00            
ATOM   4602  N   ASP C  41      41.490  24.520  35.170  1.00  0.00            
ATOM   4603  HN  ASP C  41      41.430  24.660  36.170  1.00  0.00            
ATOM   4604  CA  ASP C  41      41.140  23.180  34.740  1.00  0.00            
ATOM   4605  HA  ASP C  41      41.070  23.120  33.670  1.00  0.00            
ATOM   4606  CB  ASP C  41      42.240  22.210  35.310  1.00  0.00            
ATOM   4607  HB1 ASP C  41      43.080  22.810  35.700  1.00  0.00            
ATOM   4608  HB2 ASP C  41      41.830  21.610  36.140  1.00  0.00            
ATOM   4609  CG  ASP C  41      42.810  21.220  34.300  1.00  0.00            
ATOM   4610  OD1 ASP C  41      44.050  20.980  34.350  1.00  0.00            
ATOM   4611  OD2 ASP C  41      42.050  20.700  33.460  1.00  0.00            
ATOM   4612  C   ASP C  41      39.750  22.900  35.360  1.00  0.00            
ATOM   4613  O   ASP C  41      39.610  22.960  36.580  1.00  0.00            
ATOM   4614  N   LEU C  42      38.670  22.650  34.580  1.00  0.00            
ATOM   4615  HN  LEU C  42      38.790  22.520  33.590  1.00  0.00            
ATOM   4616  CA  LEU C  42      37.310  22.590  35.160  1.00  0.00            
ATOM   4617  HA  LEU C  42      37.390  22.360  36.210  1.00  0.00            
ATOM   4618  CB  LEU C  42      36.430  23.870  34.960  1.00  0.00            
ATOM   4619  HB1 LEU C  42      36.090  23.890  33.900  1.00  0.00            
ATOM   4620  HB2 LEU C  42      35.520  23.760  35.590  1.00  0.00            
ATOM   4621  CG  LEU C  42      36.980  25.280  35.250  1.00  0.00            
ATOM   4622  HG  LEU C  42      37.830  25.480  34.560  1.00  0.00            
ATOM   4623  CD1 LEU C  42      35.830  26.270  34.980  1.00  0.00            
ATOM   4624 1HD1 LEU C  42      36.160  27.310  35.150  1.00  0.00            
ATOM   4625 2HD1 LEU C  42      35.450  26.170  33.950  1.00  0.00            
ATOM   4626 3HD1 LEU C  42      34.980  26.050  35.670  1.00  0.00            
ATOM   4627  CD2 LEU C  42      37.450  25.480  36.670  1.00  0.00            
ATOM   4628 1HD2 LEU C  42      37.790  26.520  36.850  1.00  0.00            
ATOM   4629 2HD2 LEU C  42      36.600  25.260  37.340  1.00  0.00            
ATOM   4630 3HD2 LEU C  42      38.280  24.790  36.940  1.00  0.00            
ATOM   4631  C   LEU C  42      36.390  21.540  34.550  1.00  0.00            
ATOM   4632  O   LEU C  42      36.550  21.090  33.420  1.00  0.00            
ATOM   4633  N   SER C  43      35.260  21.260  35.250  1.00  0.00            
ATOM   4634  HN  SER C  43      35.240  21.450  36.230  1.00  0.00            
ATOM   4635  CA  SER C  43      34.010  20.880  34.580  1.00  0.00            
ATOM   4636  HA  SER C  43      34.270  20.650  33.560  1.00  0.00            
ATOM   4637  CB  SER C  43      33.380  19.560  35.080  1.00  0.00            
ATOM   4638  HB1 SER C  43      32.450  19.340  34.500  1.00  0.00            
ATOM   4639  HB2 SER C  43      34.110  18.740  34.880  1.00  0.00            
ATOM   4640  OG  SER C  43      33.080  19.550  36.470  1.00  0.00            
ATOM   4641  HG1 SER C  43      32.950  18.630  36.720  1.00  0.00            
ATOM   4642  C   SER C  43      33.000  22.030  34.420  1.00  0.00            
ATOM   4643  O   SER C  43      33.190  22.900  33.580  1.00  0.00            
ATOM   4644  N   ASN C  44      31.830  22.030  35.120  1.00  0.00            
ATOM   4645  HN  ASN C  44      31.740  21.370  35.860  1.00  0.00            
ATOM   4646  CA  ASN C  44      30.600  22.730  34.690  1.00  0.00            
ATOM   4647  HA  ASN C  44      30.840  23.280  33.800  1.00  0.00            
ATOM   4648  CB  ASN C  44      29.410  21.740  34.430  1.00  0.00            
ATOM   4649  HB1 ASN C  44      29.080  21.260  35.380  1.00  0.00            
ATOM   4650  HB2 ASN C  44      28.550  22.300  34.010  1.00  0.00            
ATOM   4651  CG  ASN C  44      29.680  20.600  33.460  1.00  0.00            
ATOM   4652  OD1 ASN C  44      28.960  19.600  33.400  1.00  0.00            
ATOM   4653  ND2 ASN C  44      30.750  20.710  32.660  1.00  0.00            
ATOM   4654 1HD2 ASN C  44      31.340  21.520  32.770  1.00  0.00            
ATOM   4655 2HD2 ASN C  44      30.970  19.950  32.060  1.00  0.00            
ATOM   4656  C   ASN C  44      30.000  23.750  35.660  1.00  0.00            
ATOM   4657  O   ASN C  44      29.570  23.410  36.750  1.00  0.00            
ATOM   4658  N   VAL C  45      29.890  25.050  35.320  1.00  0.00            
ATOM   4659  HN  VAL C  45      30.170  25.350  34.420  1.00  0.00            
ATOM   4660  CA  VAL C  45      29.690  26.090  36.340  1.00  0.00            
ATOM   4661  HA  VAL C  45      29.180  25.690  37.200  1.00  0.00            
ATOM   4662  CB  VAL C  45      31.090  26.650  36.740  1.00  0.00            
ATOM   4663  HB  VAL C  45      31.550  27.180  35.880  1.00  0.00            
ATOM   4664  CG1 VAL C  45      31.010  27.600  37.920  1.00  0.00            
ATOM   4665 1HG1 VAL C  45      31.990  28.010  38.200  1.00  0.00            
ATOM   4666 2HG1 VAL C  45      30.330  28.420  37.720  1.00  0.00            
ATOM   4667 3HG1 VAL C  45      30.600  27.050  38.780  1.00  0.00            
ATOM   4668  CG2 VAL C  45      32.090  25.580  37.200  1.00  0.00            
ATOM   4669 1HG2 VAL C  45      33.030  26.070  37.550  1.00  0.00            
ATOM   4670 2HG2 VAL C  45      31.680  25.020  38.070  1.00  0.00            
ATOM   4671 3HG2 VAL C  45      32.360  24.870  36.400  1.00  0.00            
ATOM   4672  C   VAL C  45      28.840  27.280  35.820  1.00  0.00            
ATOM   4673  O   VAL C  45      29.410  28.320  35.560  1.00  0.00            
ATOM   4674  N   GLN C  46      27.500  27.230  35.600  1.00  0.00            
ATOM   4675  HN  GLN C  46      26.950  26.440  35.870  1.00  0.00            
ATOM   4676  CA  GLN C  46      26.770  28.310  34.880  1.00  0.00            
ATOM   4677  HA  GLN C  46      27.190  28.340  33.890  1.00  0.00            
ATOM   4678  CB  GLN C  46      25.260  27.990  34.720  1.00  0.00            
ATOM   4679  HB1 GLN C  46      24.800  27.850  35.720  1.00  0.00            
ATOM   4680  HB2 GLN C  46      24.750  28.860  34.250  1.00  0.00            
ATOM   4681  CG  GLN C  46      25.000  26.760  33.830  1.00  0.00            
ATOM   4682  HG1 GLN C  46      25.520  26.920  32.860  1.00  0.00            
ATOM   4683  HG2 GLN C  46      25.390  25.830  34.290  1.00  0.00            
ATOM   4684  CD  GLN C  46      23.520  26.560  33.490  1.00  0.00            
ATOM   4685  OE1 GLN C  46      23.140  26.660  32.330  1.00  0.00            
ATOM   4686  NE2 GLN C  46      22.680  26.230  34.490  1.00  0.00            
ATOM   4687 1HE2 GLN C  46      22.970  26.290  35.450  1.00  0.00            
ATOM   4688 2HE2 GLN C  46      21.720  26.120  34.250  1.00  0.00            
ATOM   4689  C   GLN C  46      26.890  29.760  35.400  1.00  0.00            
ATOM   4690  O   GLN C  46      26.600  30.040  36.570  1.00  0.00            
ATOM   4691  N   SER C  47      27.280  30.710  34.500  1.00  0.00            
ATOM   4692  HN  SER C  47      27.060  30.580  33.530  1.00  0.00            
ATOM   4693  CA  SER C  47      28.510  31.500  34.650  1.00  0.00            
ATOM   4694  HA  SER C  47      28.740  31.630  35.690  1.00  0.00            
ATOM   4695  CB  SER C  47      29.710  30.850  33.880  1.00  0.00            
ATOM   4696  HB1 SER C  47      30.550  31.540  33.650  1.00  0.00            
ATOM   4697  HB2 SER C  47      30.160  30.030  34.460  1.00  0.00            
ATOM   4698  OG  SER C  47      29.220  30.360  32.640  1.00  0.00            
ATOM   4699  HG1 SER C  47      29.760  29.650  32.280  1.00  0.00            
ATOM   4700  C   SER C  47      28.570  32.880  34.080  1.00  0.00            
ATOM   4701  O   SER C  47      27.940  33.210  33.080  1.00  0.00            
ATOM   4702  N   LYS C  48      29.500  33.680  34.670  1.00  0.00            
ATOM   4703  HN  LYS C  48      29.860  33.410  35.560  1.00  0.00            
ATOM   4704  CA  LYS C  48      30.280  34.690  33.980  1.00  0.00            
ATOM   4705  HA  LYS C  48      30.430  34.360  32.960  1.00  0.00            
ATOM   4706  CB  LYS C  48      29.650  36.110  33.990  1.00  0.00            
ATOM   4707  HB1 LYS C  48      29.340  36.350  35.020  1.00  0.00            
ATOM   4708  HB2 LYS C  48      30.400  36.860  33.670  1.00  0.00            
ATOM   4709  CG  LYS C  48      28.450  36.200  33.050  1.00  0.00            
ATOM   4710  HG1 LYS C  48      28.830  36.020  32.020  1.00  0.00            
ATOM   4711  HG2 LYS C  48      27.730  35.380  33.280  1.00  0.00            
ATOM   4712  CD  LYS C  48      27.620  37.480  33.120  1.00  0.00            
ATOM   4713  HD1 LYS C  48      27.060  37.430  34.070  1.00  0.00            
ATOM   4714  HD2 LYS C  48      28.300  38.370  33.130  1.00  0.00            
ATOM   4715  CE  LYS C  48      26.630  37.530  31.980  1.00  0.00            
ATOM   4716  HE1 LYS C  48      27.210  37.780  31.070  1.00  0.00            
ATOM   4717  HE2 LYS C  48      26.120  36.540  31.850  1.00  0.00            
ATOM   4718  NZ  LYS C  48      25.600  38.560  32.200  1.00  0.00            
ATOM   4719  HZ1 LYS C  48      24.950  38.600  31.390  1.00  0.00            
ATOM   4720  HZ2 LYS C  48      25.040  38.320  33.030  1.00  0.00            
ATOM   4721  HZ3 LYS C  48      26.060  39.490  32.330  1.00  0.00            
ATOM   4722  C   LYS C  48      31.660  34.790  34.620  1.00  0.00            
ATOM   4723  O   LYS C  48      31.800  34.620  35.830  1.00  0.00            
ATOM   4724  N   CYS C  49      32.710  35.080  33.820  1.00  0.00            
ATOM   4725  HN  CYS C  49      32.600  35.140  32.820  1.00  0.00            
ATOM   4726  CA  CYS C  49      34.030  35.430  34.330  1.00  0.00            
ATOM   4727  HA  CYS C  49      33.960  35.630  35.380  1.00  0.00            
ATOM   4728  CB  CYS C  49      35.090  34.300  34.130  1.00  0.00            
ATOM   4729  HB1 CYS C  49      34.630  33.350  34.490  1.00  0.00            
ATOM   4730  HB2 CYS C  49      35.280  34.170  33.040  1.00  0.00            
ATOM   4731  SG  CYS C  49      36.660  34.580  35.040  1.00  0.00            
ATOM   4732  HG1 CYS C  49      37.300  33.510  34.590  1.00  0.00            
ATOM   4733  C   CYS C  49      34.510  36.700  33.650  1.00  0.00            
ATOM   4734  O   CYS C  49      34.270  36.920  32.470  1.00  0.00            
ATOM   4735  N   GLY C  50      35.190  37.600  34.390  1.00  0.00            
ATOM   4736  HN  GLY C  50      35.330  37.460  35.370  1.00  0.00            
ATOM   4737  CA  GLY C  50      35.840  38.760  33.790  1.00  0.00            
ATOM   4738  HA1 GLY C  50      36.000  38.590  32.740  1.00  0.00            
ATOM   4739  HA2 GLY C  50      35.240  39.630  34.000  1.00  0.00            
ATOM   4740  C   GLY C  50      37.190  38.990  34.410  1.00  0.00            
ATOM   4741  O   GLY C  50      37.350  38.840  35.620  1.00  0.00            
ATOM   4742  N   SER C  51      38.190  39.400  33.610  1.00  0.00            
ATOM   4743  HN  SER C  51      38.080  39.430  32.610  1.00  0.00            
ATOM   4744  CA  SER C  51      39.470  39.830  34.140  1.00  0.00            
ATOM   4745  HA  SER C  51      39.320  40.130  35.160  1.00  0.00            
ATOM   4746  CB  SER C  51      40.580  38.750  34.180  1.00  0.00            
ATOM   4747  HB1 SER C  51      41.520  39.200  34.590  1.00  0.00            
ATOM   4748  HB2 SER C  51      40.240  37.960  34.890  1.00  0.00            
ATOM   4749  OG  SER C  51      40.840  38.150  32.910  1.00  0.00            
ATOM   4750  HG1 SER C  51      41.360  37.370  33.070  1.00  0.00            
ATOM   4751  C   SER C  51      39.950  41.080  33.440  1.00  0.00            
ATOM   4752  O   SER C  51      39.740  41.280  32.240  1.00  0.00            
ATOM   4753  N   LYS C  52      40.560  42.020  34.170  1.00  0.00            
ATOM   4754  HN  LYS C  52      40.730  41.890  35.150  1.00  0.00            
ATOM   4755  CA  LYS C  52      41.060  43.230  33.550  1.00  0.00            
ATOM   4756  HA  LYS C  52      41.270  43.050  32.510  1.00  0.00            
ATOM   4757  CB  LYS C  52      40.030  44.390  33.670  1.00  0.00            
ATOM   4758  HB1 LYS C  52      39.060  44.040  33.260  1.00  0.00            
ATOM   4759  HB2 LYS C  52      39.870  44.590  34.750  1.00  0.00            
ATOM   4760  CG  LYS C  52      40.470  45.660  32.940  1.00  0.00            
ATOM   4761  HG1 LYS C  52      41.560  45.820  33.150  1.00  0.00            
ATOM   4762  HG2 LYS C  52      40.390  45.500  31.840  1.00  0.00            
ATOM   4763  CD  LYS C  52      39.740  46.940  33.370  1.00  0.00            
ATOM   4764  HD1 LYS C  52      38.730  46.960  32.910  1.00  0.00            
ATOM   4765  HD2 LYS C  52      39.620  46.900  34.480  1.00  0.00            
ATOM   4766  CE  LYS C  52      40.590  48.150  32.980  1.00  0.00            
ATOM   4767  HE1 LYS C  52      41.610  48.030  33.420  1.00  0.00            
ATOM   4768  HE2 LYS C  52      40.690  48.220  31.880  1.00  0.00            
ATOM   4769  NZ  LYS C  52      40.030  49.420  33.490  1.00  0.00            
ATOM   4770  HZ1 LYS C  52      40.690  50.190  33.220  1.00  0.00            
ATOM   4771  HZ2 LYS C  52      39.090  49.580  33.100  1.00  0.00            
ATOM   4772  HZ3 LYS C  52      39.980  49.360  34.520  1.00  0.00            
ATOM   4773  C   LYS C  52      42.380  43.660  34.170  1.00  0.00            
ATOM   4774  O   LYS C  52      42.460  43.940  35.370  1.00  0.00            
ATOM   4775  N   ASP C  53      43.420  43.790  33.330  1.00  0.00            
ATOM   4776  HN  ASP C  53      43.300  43.610  32.360  1.00  0.00            
ATOM   4777  CA  ASP C  53      44.790  43.960  33.760  1.00  0.00            
ATOM   4778  HA  ASP C  53      44.830  44.020  34.840  1.00  0.00            
ATOM   4779  CB  ASP C  53      45.650  42.710  33.280  1.00  0.00            
ATOM   4780  HB1 ASP C  53      45.670  42.730  32.170  1.00  0.00            
ATOM   4781  HB2 ASP C  53      46.690  42.840  33.640  1.00  0.00            
ATOM   4782  CG  ASP C  53      45.210  41.270  33.670  1.00  0.00            
ATOM   4783  OD1 ASP C  53      46.080  40.350  33.740  1.00  0.00            
ATOM   4784  OD2 ASP C  53      44.000  40.990  33.870  1.00  0.00            
ATOM   4785  C   ASP C  53      45.270  45.330  33.190  1.00  0.00            
ATOM   4786  O   ASP C  53      45.130  45.610  31.990  1.00  0.00            
ATOM   4787  N   ASN C  54      45.790  46.280  34.010  1.00  0.00            
ATOM   4788  HN  ASN C  54      45.880  46.090  34.990  1.00  0.00            
ATOM   4789  CA  ASN C  54      46.160  47.630  33.540  1.00  0.00            
ATOM   4790  HA  ASN C  54      46.310  47.600  32.480  1.00  0.00            
ATOM   4791  CB  ASN C  54      45.020  48.650  33.910  1.00  0.00            
ATOM   4792  HB1 ASN C  54      44.160  48.080  34.310  1.00  0.00            
ATOM   4793  HB2 ASN C  54      45.350  49.340  34.700  1.00  0.00            
ATOM   4794  CG  ASN C  54      44.490  49.520  32.770  1.00  0.00            
ATOM   4795  OD1 ASN C  54      43.280  49.600  32.520  1.00  0.00            
ATOM   4796  ND2 ASN C  54      45.390  50.290  32.120  1.00  0.00            
ATOM   4797 1HD2 ASN C  54      46.360  50.170  32.300  1.00  0.00            
ATOM   4798 2HD2 ASN C  54      45.060  50.840  31.360  1.00  0.00            
ATOM   4799  C   ASN C  54      47.480  48.140  34.170  1.00  0.00            
ATOM   4800  O   ASN C  54      47.580  48.270  35.390  1.00  0.00            
ATOM   4801  N   ILE C  55      48.510  48.490  33.360  1.00  0.00            
ATOM   4802  HN  ILE C  55      48.430  48.410  32.360  1.00  0.00            
ATOM   4803  CA  ILE C  55      49.860  48.810  33.860  1.00  0.00            
ATOM   4804  HA  ILE C  55      49.820  48.960  34.930  1.00  0.00            
ATOM   4805  CB  ILE C  55      50.850  47.660  33.600  1.00  0.00            
ATOM   4806  HB  ILE C  55      50.950  47.520  32.500  1.00  0.00            
ATOM   4807  CG2 ILE C  55      52.240  47.980  34.200  1.00  0.00            
ATOM   4808 1HG2 ILE C  55      52.950  47.140  34.010  1.00  0.00            
ATOM   4809 2HG2 ILE C  55      52.690  48.880  33.730  1.00  0.00            
ATOM   4810 3HG2 ILE C  55      52.170  48.130  35.290  1.00  0.00            
ATOM   4811  CG1 ILE C  55      50.300  46.320  34.190  1.00  0.00            
ATOM   4812 1HG1 ILE C  55      50.210  46.420  35.290  1.00  0.00            
ATOM   4813 2HG1 ILE C  55      49.290  46.120  33.780  1.00  0.00            
ATOM   4814  CD  ILE C  55      51.160  45.090  33.860  1.00  0.00            
ATOM   4815  HD1 ILE C  55      50.670  44.170  34.270  1.00  0.00            
ATOM   4816  HD2 ILE C  55      51.260  44.970  32.760  1.00  0.00            
ATOM   4817  HD3 ILE C  55      52.170  45.170  34.320  1.00  0.00            
ATOM   4818  C   ILE C  55      50.400  50.130  33.260  1.00  0.00            
ATOM   4819  O   ILE C  55      50.260  50.380  32.060  1.00  0.00            
ATOM   4820  N   LYS C  56      51.020  51.040  34.070  1.00  0.00            
ATOM   4821  HN  LYS C  56      51.070  50.850  35.050  1.00  0.00            
ATOM   4822  CA  LYS C  56      51.620  52.280  33.580  1.00  0.00            
ATOM   4823  HA  LYS C  56      51.840  52.140  32.540  1.00  0.00            
ATOM   4824  CB  LYS C  56      50.650  53.500  33.710  1.00  0.00            
ATOM   4825  HB1 LYS C  56      49.680  53.200  33.260  1.00  0.00            
ATOM   4826  HB2 LYS C  56      50.460  53.680  34.800  1.00  0.00            
ATOM   4827  CG  LYS C  56      51.100  54.830  33.050  1.00  0.00            
ATOM   4828  HG1 LYS C  56      52.110  55.100  33.430  1.00  0.00            
ATOM   4829  HG2 LYS C  56      51.200  54.660  31.950  1.00  0.00            
ATOM   4830  CD  LYS C  56      50.160  56.040  33.300  1.00  0.00            
ATOM   4831  HD1 LYS C  56      49.160  55.810  32.860  1.00  0.00            
ATOM   4832  HD2 LYS C  56      50.030  56.140  34.400  1.00  0.00            
ATOM   4833  CE  LYS C  56      50.680  57.380  32.720  1.00  0.00            
ATOM   4834  HE1 LYS C  56      51.740  57.530  33.020  1.00  0.00            
ATOM   4835  HE2 LYS C  56      50.640  57.350  31.610  1.00  0.00            
ATOM   4836  NZ  LYS C  56      49.930  58.590  33.160  1.00  0.00            
ATOM   4837  HZ1 LYS C  56      50.390  59.450  32.710  1.00  0.00            
ATOM   4838  HZ2 LYS C  56      48.950  58.680  32.840  1.00  0.00            
ATOM   4839  HZ3 LYS C  56      50.000  58.810  34.170  1.00  0.00            
ATOM   4840  C   LYS C  56      52.960  52.600  34.280  1.00  0.00            
ATOM   4841  O   LYS C  56      53.100  52.510  35.500  1.00  0.00            
ATOM   4842  N   HSD C  57      54.020  52.990  33.540  1.00  0.00            
ATOM   4843  HN  HSD C  57      53.920  53.040  32.540  1.00  0.00            
ATOM   4844  CA  HSD C  57      55.310  53.370  34.140  1.00  0.00            
ATOM   4845  HA  HSD C  57      55.340  53.110  35.190  1.00  0.00            
ATOM   4846  CB  HSD C  57      56.530  52.750  33.390  1.00  0.00            
ATOM   4847  HB1 HSD C  57      56.490  53.070  32.330  1.00  0.00            
ATOM   4848  HB2 HSD C  57      57.460  53.150  33.840  1.00  0.00            
ATOM   4849  ND1 HSD C  57      57.740  50.640  32.790  1.00  0.00            
ATOM   4850  HD1 HSD C  57      58.360  51.090  32.160  1.00  0.00            
ATOM   4851  CG  HSD C  57      56.660  51.260  33.380  1.00  0.00            
ATOM   4852  CE1 HSD C  57      57.530  49.300  32.880  1.00  0.00            
ATOM   4853  HE1 HSD C  57      58.160  48.520  32.450  1.00  0.00            
ATOM   4854  NE2 HSD C  57      56.410  49.040  33.500  1.00  0.00            
ATOM   4855  CD2 HSD C  57      55.840  50.260  33.800  1.00  0.00            
ATOM   4856  HD2 HSD C  57      54.860  50.280  34.260  1.00  0.00            
ATOM   4857  C   HSD C  57      55.570  54.860  34.000  1.00  0.00            
ATOM   4858  O   HSD C  57      55.470  55.350  32.890  1.00  0.00            
ATOM   4859  N   VAL C  58      55.960  55.600  35.070  1.00  0.00            
ATOM   4860  HN  VAL C  58      55.910  55.250  36.010  1.00  0.00            
ATOM   4861  CA  VAL C  58      56.190  57.060  35.060  1.00  0.00            
ATOM   4862  HA  VAL C  58      56.270  57.400  34.040  1.00  0.00            
ATOM   4863  CB  VAL C  58      55.020  57.800  35.730  1.00  0.00            
ATOM   4864  HB  VAL C  58      55.030  57.620  36.830  1.00  0.00            
ATOM   4865  CG1 VAL C  58      55.090  59.330  35.490  1.00  0.00            
ATOM   4866 1HG1 VAL C  58      54.230  59.830  35.980  1.00  0.00            
ATOM   4867 2HG1 VAL C  58      56.010  59.770  35.930  1.00  0.00            
ATOM   4868 3HG1 VAL C  58      55.060  59.560  34.410  1.00  0.00            
ATOM   4869  CG2 VAL C  58      53.660  57.310  35.180  1.00  0.00            
ATOM   4870 1HG2 VAL C  58      52.850  57.920  35.640  1.00  0.00            
ATOM   4871 2HG2 VAL C  58      53.630  57.470  34.080  1.00  0.00            
ATOM   4872 3HG2 VAL C  58      53.480  56.240  35.420  1.00  0.00            
ATOM   4873  C   VAL C  58      57.510  57.460  35.780  1.00  0.00            
ATOM   4874  O   VAL C  58      57.480  58.120  36.810  1.00  0.00            
ATOM   4875  N   PRO C  59      58.710  57.040  35.370  1.00  0.00            
ATOM   4876  CD  PRO C  59      59.090  55.710  35.880  1.00  0.00            
ATOM   4877  HD1 PRO C  59      58.710  54.930  35.190  1.00  0.00            
ATOM   4878  HD2 PRO C  59      58.670  55.560  36.900  1.00  0.00            
ATOM   4879  CA  PRO C  59      59.870  57.900  35.580  1.00  0.00            
ATOM   4880  HA  PRO C  59      59.900  58.140  36.620  1.00  0.00            
ATOM   4881  CB  PRO C  59      61.020  56.970  35.230  1.00  0.00            
ATOM   4882  HB1 PRO C  59      61.040  56.800  34.130  1.00  0.00            
ATOM   4883  HB2 PRO C  59      62.000  57.390  35.550  1.00  0.00            
ATOM   4884  CG  PRO C  59      60.630  55.710  35.980  1.00  0.00            
ATOM   4885  HG1 PRO C  59      61.100  54.810  35.560  1.00  0.00            
ATOM   4886  HG2 PRO C  59      60.920  55.840  37.040  1.00  0.00            
ATOM   4887  C   PRO C  59      60.040  59.230  34.840  1.00  0.00            
ATOM   4888  O   PRO C  59      59.770  59.340  33.660  1.00  0.00            
ATOM   4889  N   GLY C  60      60.630  60.240  35.510  1.00  0.00            
ATOM   4890  HN  GLY C  60      60.730  60.170  36.500  1.00  0.00            
ATOM   4891  CA  GLY C  60      61.210  61.380  34.820  1.00  0.00            
ATOM   4892  HA1 GLY C  60      61.390  61.130  33.780  1.00  0.00            
ATOM   4893  HA2 GLY C  60      60.530  62.210  34.940  1.00  0.00            
ATOM   4894  C   GLY C  60      62.530  61.780  35.410  1.00  0.00            
ATOM   4895  O   GLY C  60      62.640  61.970  36.620  1.00  0.00            
ATOM   4896  N   GLY C  61      63.580  61.930  34.570  1.00  0.00            
ATOM   4897  HN  GLY C  61      63.440  61.790  33.590  1.00  0.00            
ATOM   4898  CA  GLY C  61      64.900  62.400  34.980  1.00  0.00            
ATOM   4899  HA1 GLY C  61      64.950  62.500  36.060  1.00  0.00            
ATOM   4900  HA2 GLY C  61      65.620  61.710  34.600  1.00  0.00            
ATOM   4901  C   GLY C  61      65.210  63.750  34.380  1.00  0.00            
ATOM   4902  O   GLY C  61      64.610  64.180  33.390  1.00  0.00            
ATOM   4903  N   GLY C  62      66.190  64.470  34.950  1.00  0.00            
ATOM   4904  HN  GLY C  62      66.630  64.170  35.800  1.00  0.00            
ATOM   4905  CA  GLY C  62      66.690  65.700  34.370  1.00  0.00            
ATOM   4906  HA1 GLY C  62      66.820  65.560  33.310  1.00  0.00            
ATOM   4907  HA2 GLY C  62      66.010  66.500  34.620  1.00  0.00            
ATOM   4908  C   GLY C  62      68.020  66.050  34.970  1.00  0.00            
ATOM   4909  O   GLY C  62      68.150  66.040  36.190  1.00  0.00            
ATOM   4910  N   SER C  63      69.040  66.340  34.150  1.00  0.00            
ATOM   4911  HN  SER C  63      68.930  66.320  33.150  1.00  0.00            
ATOM   4912  CA  SER C  63      70.390  66.620  34.620  1.00  0.00            
ATOM   4913  HA  SER C  63      70.380  66.740  35.700  1.00  0.00            
ATOM   4914  CB  SER C  63      71.390  65.460  34.320  1.00  0.00            
ATOM   4915  HB1 SER C  63      72.410  65.750  34.660  1.00  0.00            
ATOM   4916  HB2 SER C  63      71.070  64.580  34.920  1.00  0.00            
ATOM   4917  OG  SER C  63      71.420  65.090  32.940  1.00  0.00            
ATOM   4918  HG1 SER C  63      72.030  64.360  32.860  1.00  0.00            
ATOM   4919  C   SER C  63      70.940  67.920  34.050  1.00  0.00            
ATOM   4920  O   SER C  63      70.880  68.170  32.850  1.00  0.00            
ATOM   4921  N   VAL C  64      71.460  68.810  34.930  1.00  0.00            
ATOM   4922  HN  VAL C  64      71.430  68.620  35.910  1.00  0.00            
ATOM   4923  CA  VAL C  64      71.970  70.110  34.530  1.00  0.00            
ATOM   4924  HA  VAL C  64      72.010  70.180  33.450  1.00  0.00            
ATOM   4925  CB  VAL C  64      71.090  71.260  35.060  1.00  0.00            
ATOM   4926  HB  VAL C  64      71.120  71.260  36.170  1.00  0.00            
ATOM   4927  CG1 VAL C  64      71.600  72.620  34.540  1.00  0.00            
ATOM   4928 1HG1 VAL C  64      70.930  73.430  34.910  1.00  0.00            
ATOM   4929 2HG1 VAL C  64      72.620  72.840  34.890  1.00  0.00            
ATOM   4930 3HG1 VAL C  64      71.590  72.640  33.430  1.00  0.00            
ATOM   4931  CG2 VAL C  64      69.630  71.040  34.620  1.00  0.00            
ATOM   4932 1HG2 VAL C  64      69.000  71.890  34.960  1.00  0.00            
ATOM   4933 2HG2 VAL C  64      69.570  70.980  33.510  1.00  0.00            
ATOM   4934 3HG2 VAL C  64      69.210  70.110  35.050  1.00  0.00            
ATOM   4935  C   VAL C  64      73.390  70.300  35.060  1.00  0.00            
ATOM   4936  O   VAL C  64      73.640  70.160  36.260  1.00  0.00            
ATOM   4937  N   GLN C  65      74.360  70.610  34.180  1.00  0.00            
ATOM   4938  HN  GLN C  65      74.160  70.650  33.200  1.00  0.00            
ATOM   4939  CA  GLN C  65      75.730  70.900  34.570  1.00  0.00            
ATOM   4940  HA  GLN C  65      75.810  70.970  35.640  1.00  0.00            
ATOM   4941  CB  GLN C  65      76.680  69.780  34.060  1.00  0.00            
ATOM   4942  HB1 GLN C  65      76.250  68.800  34.370  1.00  0.00            
ATOM   4943  HB2 GLN C  65      76.680  69.800  32.950  1.00  0.00            
ATOM   4944  CG  GLN C  65      78.130  69.880  34.600  1.00  0.00            
ATOM   4945  HG1 GLN C  65      78.500  70.930  34.530  1.00  0.00            
ATOM   4946  HG2 GLN C  65      78.190  69.580  35.660  1.00  0.00            
ATOM   4947  CD  GLN C  65      79.100  69.040  33.770  1.00  0.00            
ATOM   4948  OE1 GLN C  65      80.030  69.550  33.160  1.00  0.00            
ATOM   4949  NE2 GLN C  65      78.870  67.710  33.720  1.00  0.00            
ATOM   4950 1HE2 GLN C  65      78.100  67.320  34.210  1.00  0.00            
ATOM   4951 2HE2 GLN C  65      79.530  67.170  33.200  1.00  0.00            
ATOM   4952  C   GLN C  65      76.190  72.230  33.980  1.00  0.00            
ATOM   4953  O   GLN C  65      76.130  72.440  32.770  1.00  0.00            
ATOM   4954  N   ILE C  66      76.670  73.160  34.820  1.00  0.00            
ATOM   4955  HN  ILE C  66      76.680  73.000  35.810  1.00  0.00            
ATOM   4956  CA  ILE C  66      77.170  74.460  34.380  1.00  0.00            
ATOM   4957  HA  ILE C  66      77.270  74.460  33.300  1.00  0.00            
ATOM   4958  CB  ILE C  66      76.250  75.620  34.770  1.00  0.00            
ATOM   4959  HB  ILE C  66      76.200  75.680  35.890  1.00  0.00            
ATOM   4960  CG2 ILE C  66      76.830  76.950  34.230  1.00  0.00            
ATOM   4961 1HG2 ILE C  66      76.170  77.800  34.500  1.00  0.00            
ATOM   4962 2HG2 ILE C  66      77.830  77.170  34.650  1.00  0.00            
ATOM   4963 3HG2 ILE C  66      76.910  76.910  33.120  1.00  0.00            
ATOM   4964  CG1 ILE C  66      74.810  75.380  34.250  1.00  0.00            
ATOM   4965 1HG1 ILE C  66      74.830  75.350  33.140  1.00  0.00            
ATOM   4966 2HG1 ILE C  66      74.450  74.390  34.600  1.00  0.00            
ATOM   4967  CD  ILE C  66      73.790  76.430  34.720  1.00  0.00            
ATOM   4968  HD1 ILE C  66      72.780  76.180  34.340  1.00  0.00            
ATOM   4969  HD2 ILE C  66      73.750  76.460  35.830  1.00  0.00            
ATOM   4970  HD3 ILE C  66      74.050  77.440  34.340  1.00  0.00            
ATOM   4971  C   ILE C  66      78.570  74.700  34.950  1.00  0.00            
ATOM   4972  O   ILE C  66      78.770  74.650  36.160  1.00  0.00            
ATOM   4973  N   VAL C  67      79.570  74.950  34.090  1.00  0.00            
ATOM   4974  HN  VAL C  67      79.390  74.950  33.100  1.00  0.00            
ATOM   4975  CA  VAL C  67      80.960  75.130  34.500  1.00  0.00            
ATOM   4976  HA  VAL C  67      81.020  75.160  35.580  1.00  0.00            
ATOM   4977  CB  VAL C  67      81.850  73.990  34.010  1.00  0.00            
ATOM   4978  HB  VAL C  67      81.840  73.970  32.890  1.00  0.00            
ATOM   4979  CG1 VAL C  67      83.290  74.160  34.510  1.00  0.00            
ATOM   4980 1HG1 VAL C  67      83.890  73.280  34.190  1.00  0.00            
ATOM   4981 2HG1 VAL C  67      83.760  75.080  34.110  1.00  0.00            
ATOM   4982 3HG1 VAL C  67      83.310  74.200  35.620  1.00  0.00            
ATOM   4983  CG2 VAL C  67      81.290  72.640  34.500  1.00  0.00            
ATOM   4984 1HG2 VAL C  67      81.950  71.810  34.170  1.00  0.00            
ATOM   4985 2HG2 VAL C  67      81.240  72.620  35.610  1.00  0.00            
ATOM   4986 3HG2 VAL C  67      80.280  72.440  34.100  1.00  0.00            
ATOM   4987  C   VAL C  67      81.530  76.450  33.990  1.00  0.00            
ATOM   4988  O   VAL C  67      81.520  76.730  32.790  1.00  0.00            
ATOM   4989  N   TYR C  68      82.060  77.310  34.890  1.00  0.00            
ATOM   4990  HN  TYR C  68      82.000  77.090  35.870  1.00  0.00            
ATOM   4991  CA  TYR C  68      82.660  78.590  34.560  1.00  0.00            
ATOM   4992  HA  TYR C  68      82.760  78.650  33.490  1.00  0.00            
ATOM   4993  CB  TYR C  68      81.640  79.740  34.960  1.00  0.00            
ATOM   4994  HB1 TYR C  68      81.310  80.200  34.000  1.00  0.00            
ATOM   4995  HB2 TYR C  68      80.740  79.230  35.370  1.00  0.00            
ATOM   4996  CG  TYR C  68      81.900  80.910  35.910  1.00  0.00            
ATOM   4997  CD1 TYR C  68      83.050  81.180  36.690  1.00  0.00            
ATOM   4998  HD1 TYR C  68      83.900  80.540  36.710  1.00  0.00            
ATOM   4999  CE1 TYR C  68      83.140  82.330  37.480  1.00  0.00            
ATOM   5000  HE1 TYR C  68      84.040  82.530  38.040  1.00  0.00            
ATOM   5001  CZ  TYR C  68      82.090  83.240  37.530  1.00  0.00            
ATOM   5002  OH  TYR C  68      82.230  84.420  38.290  1.00  0.00            
ATOM   5003  HH  TYR C  68      81.380  84.860  38.270  1.00  0.00            
ATOM   5004  CD2 TYR C  68      80.830  81.830  36.010  1.00  0.00            
ATOM   5005  HD2 TYR C  68      79.930  81.650  35.450  1.00  0.00            
ATOM   5006  CE2 TYR C  68      80.920  82.980  36.810  1.00  0.00            
ATOM   5007  HE2 TYR C  68      80.090  83.660  36.870  1.00  0.00            
ATOM   5008  C   TYR C  68      84.100  78.640  35.090  1.00  0.00            
ATOM   5009  O   TYR C  68      84.370  78.320  36.240  1.00  0.00            
ATOM   5010  N   LYS C  69      85.080  79.030  34.240  1.00  0.00            
ATOM   5011  HN  LYS C  69      84.890  79.130  33.260  1.00  0.00            
ATOM   5012  CA  LYS C  69      86.490  79.150  34.660  1.00  0.00            
ATOM   5013  HA  LYS C  69      86.530  79.280  35.730  1.00  0.00            
ATOM   5014  CB  LYS C  69      87.310  77.850  34.290  1.00  0.00            
ATOM   5015  HB1 LYS C  69      87.460  77.830  33.190  1.00  0.00            
ATOM   5016  HB2 LYS C  69      88.310  77.940  34.770  1.00  0.00            
ATOM   5017  CG  LYS C  69      86.680  76.490  34.690  1.00  0.00            
ATOM   5018  HG1 LYS C  69      86.390  76.530  35.760  1.00  0.00            
ATOM   5019  HG2 LYS C  69      85.740  76.370  34.100  1.00  0.00            
ATOM   5020  CD  LYS C  69      87.560  75.220  34.450  1.00  0.00            
ATOM   5021  HD1 LYS C  69      87.970  75.270  33.410  1.00  0.00            
ATOM   5022  HD2 LYS C  69      88.420  75.270  35.150  1.00  0.00            
ATOM   5023  CE  LYS C  69      86.800  73.880  34.620  1.00  0.00            
ATOM   5024  HE1 LYS C  69      86.320  73.870  35.630  1.00  0.00            
ATOM   5025  HE2 LYS C  69      86.000  73.810  33.850  1.00  0.00            
ATOM   5026  NZ  LYS C  69      87.620  72.630  34.530  1.00  0.00            
ATOM   5027  HZ1 LYS C  69      87.050  71.820  34.920  1.00  0.00            
ATOM   5028  HZ2 LYS C  69      87.880  72.290  33.560  1.00  0.00            
ATOM   5029  HZ3 LYS C  69      88.450  72.630  35.130  1.00  0.00            
ATOM   5030  C   LYS C  69      87.190  80.400  34.040  1.00  0.00            
ATOM   5031  O   LYS C  69      87.810  80.230  32.990  1.00  0.00            
ATOM   5032  N   PRO C  70      87.150  81.640  34.580  1.00  0.00            
ATOM   5033  CD  PRO C  70      86.020  82.070  35.410  1.00  0.00            
ATOM   5034  HD1 PRO C  70      86.190  81.770  36.460  1.00  0.00            
ATOM   5035  HD2 PRO C  70      85.080  81.610  35.030  1.00  0.00            
ATOM   5036  CA  PRO C  70      87.750  82.800  33.900  1.00  0.00            
ATOM   5037  HA  PRO C  70      88.050  82.550  32.890  1.00  0.00            
ATOM   5038  CB  PRO C  70      86.620  83.850  33.940  1.00  0.00            
ATOM   5039  HB1 PRO C  70      86.990  84.890  33.840  1.00  0.00            
ATOM   5040  HB2 PRO C  70      85.900  83.650  33.130  1.00  0.00            
ATOM   5041  CG  PRO C  70      85.920  83.590  35.260  1.00  0.00            
ATOM   5042  HG1 PRO C  70      86.490  84.100  36.050  1.00  0.00            
ATOM   5043  HG2 PRO C  70      84.870  83.950  35.270  1.00  0.00            
ATOM   5044  C   PRO C  70      88.980  83.380  34.590  1.00  0.00            
ATOM   5045  O   PRO C  70      89.010  83.540  35.810  1.00  0.00            
ATOM   5046  N   VAL C  71      90.030  83.760  33.830  1.00  0.00            
ATOM   5047  HN  VAL C  71      89.980  83.660  32.830  1.00  0.00            
ATOM   5048  CA  VAL C  71      91.280  84.290  34.380  1.00  0.00            
ATOM   5049  HA  VAL C  71      91.180  84.410  35.450  1.00  0.00            
ATOM   5050  CB  VAL C  71      92.440  83.330  34.150  1.00  0.00            
ATOM   5051  HB  VAL C  71      92.630  83.220  33.060  1.00  0.00            
ATOM   5052  CG1 VAL C  71      93.730  83.840  34.840  1.00  0.00            
ATOM   5053 1HG1 VAL C  71      94.550  83.100  34.700  1.00  0.00            
ATOM   5054 2HG1 VAL C  71      94.060  84.810  34.410  1.00  0.00            
ATOM   5055 3HG1 VAL C  71      93.560  83.970  35.930  1.00  0.00            
ATOM   5056  CG2 VAL C  71      92.080  81.940  34.730  1.00  0.00            
ATOM   5057 1HG2 VAL C  71      92.940  81.240  34.610  1.00  0.00            
ATOM   5058 2HG2 VAL C  71      91.850  82.020  35.810  1.00  0.00            
ATOM   5059 3HG2 VAL C  71      91.210  81.500  34.210  1.00  0.00            
ATOM   5060  C   VAL C  71      91.580  85.680  33.810  1.00  0.00
[truncated: 383,952 more chars]
